# Supplementary material
Source: PubMed Central journal article supplement (PMC3098479)
Supplement: emboj2011106s1.pdf [file emboj2011106s1.pdf]

# Supplementary Figure S1C

Rösel *et al.*

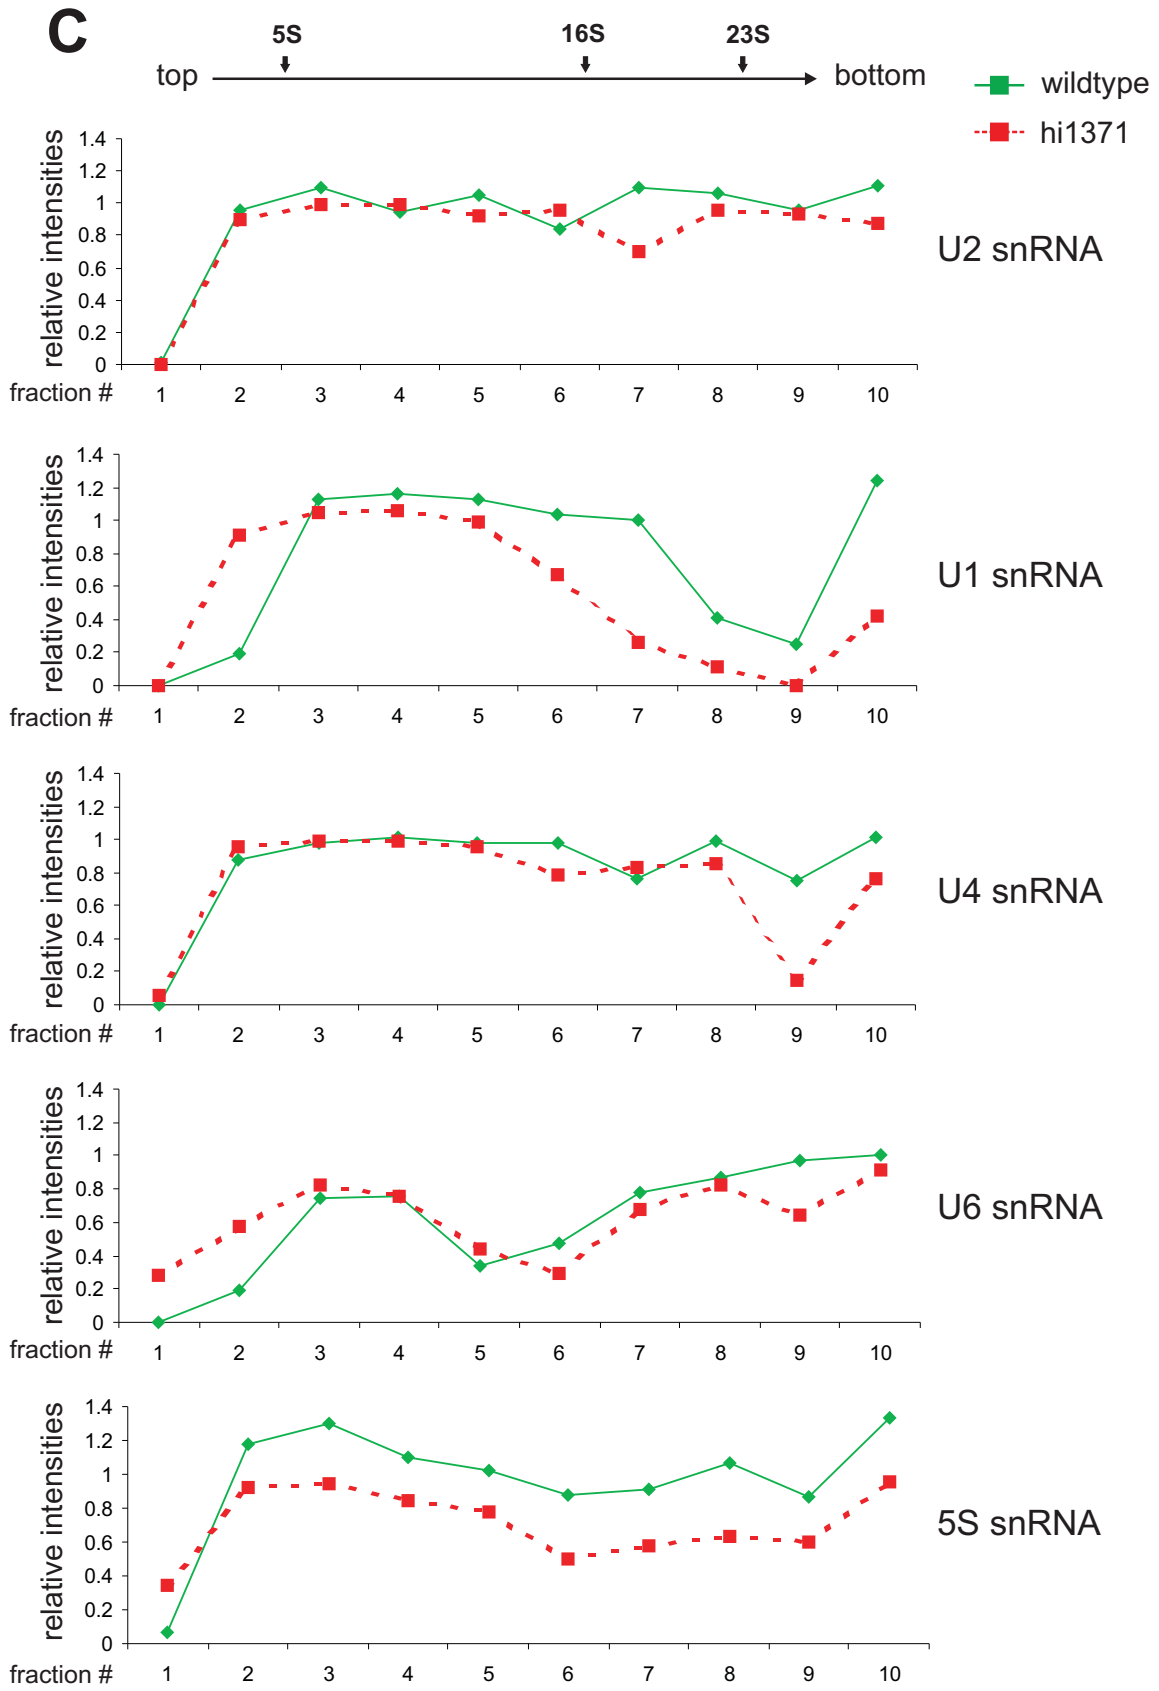

# Supplementary Figure S2

## Rösel *et al.*

### Supplementary Figure S2.

#### Genomewide effects of U1C deficiency on alternative splicing in the zebrafish: RT-PCR validation.

(A-E) Alternative splicing of 72 target genes (as indicated above the lanes) was analyzed by RT-PCR, using total RNA from wildtype (wt) versus U1C knockout mutant (mut) embryos at 3 dpf and specific primer sets (indicated by arrows in the schematic of each panel). The numbers given below each reaction refer to the respective primer mixes (for sequences, see Supplementary Table S8). Labeled in green are genes that are also shown in Figure 4. *M*, DNA size markers in bp.

(A) Increased exon skipping of 36 target genes in the absence of U1C. Top and lower bands (except if specifically labeled) represent the exon inclusion and skipping products, respectively; arrows mark additional, unspecific RT-PCR products. Four genes, *sulf1*, *tpd52l2*, *sh3glb2* and *zgc:158450*, contain two adjacent exons that can be skipped individually: arrow heads indicate single-exon skipping products.

(B) U1C-dependent alternative 5' splice site usage of 25 target genes. The top and lower bands reflect usage of the proximal and distal 5' splice sites, respectively. Bands marked with arrow heads represent most likely intron retention products; unspecific RT-PCR products are labeled with arrows.

(C) U1C-dependent mutually exclusive exons in two genes (designated 4a and 4b for *eno1* and 8a and 9 for *pkm2a*).

(D) Increased intron retention in the absence of U1C, as validated for 9 target genes. To control for genomic DNA contamination, the same reactions were also done in the absence of reverse transcriptase (-RT panels); the arrows mark the intron retention products and the positions where the respective band would be expected in the -RT control reactions. The primer positions given in the schematic are representative for almost all reactions, except primer mixes 66, 73 and 75. For experimental reasons the reverse primers of those four reactions are located within the intron, and therefore only one intron-specific band is visible. One candidate which appeared to be negative after validation (showing no difference in the intron retention product between wildtype and mutant) was left out.

# Supplementary Figure S2A

## Rösel *et al.*

### A

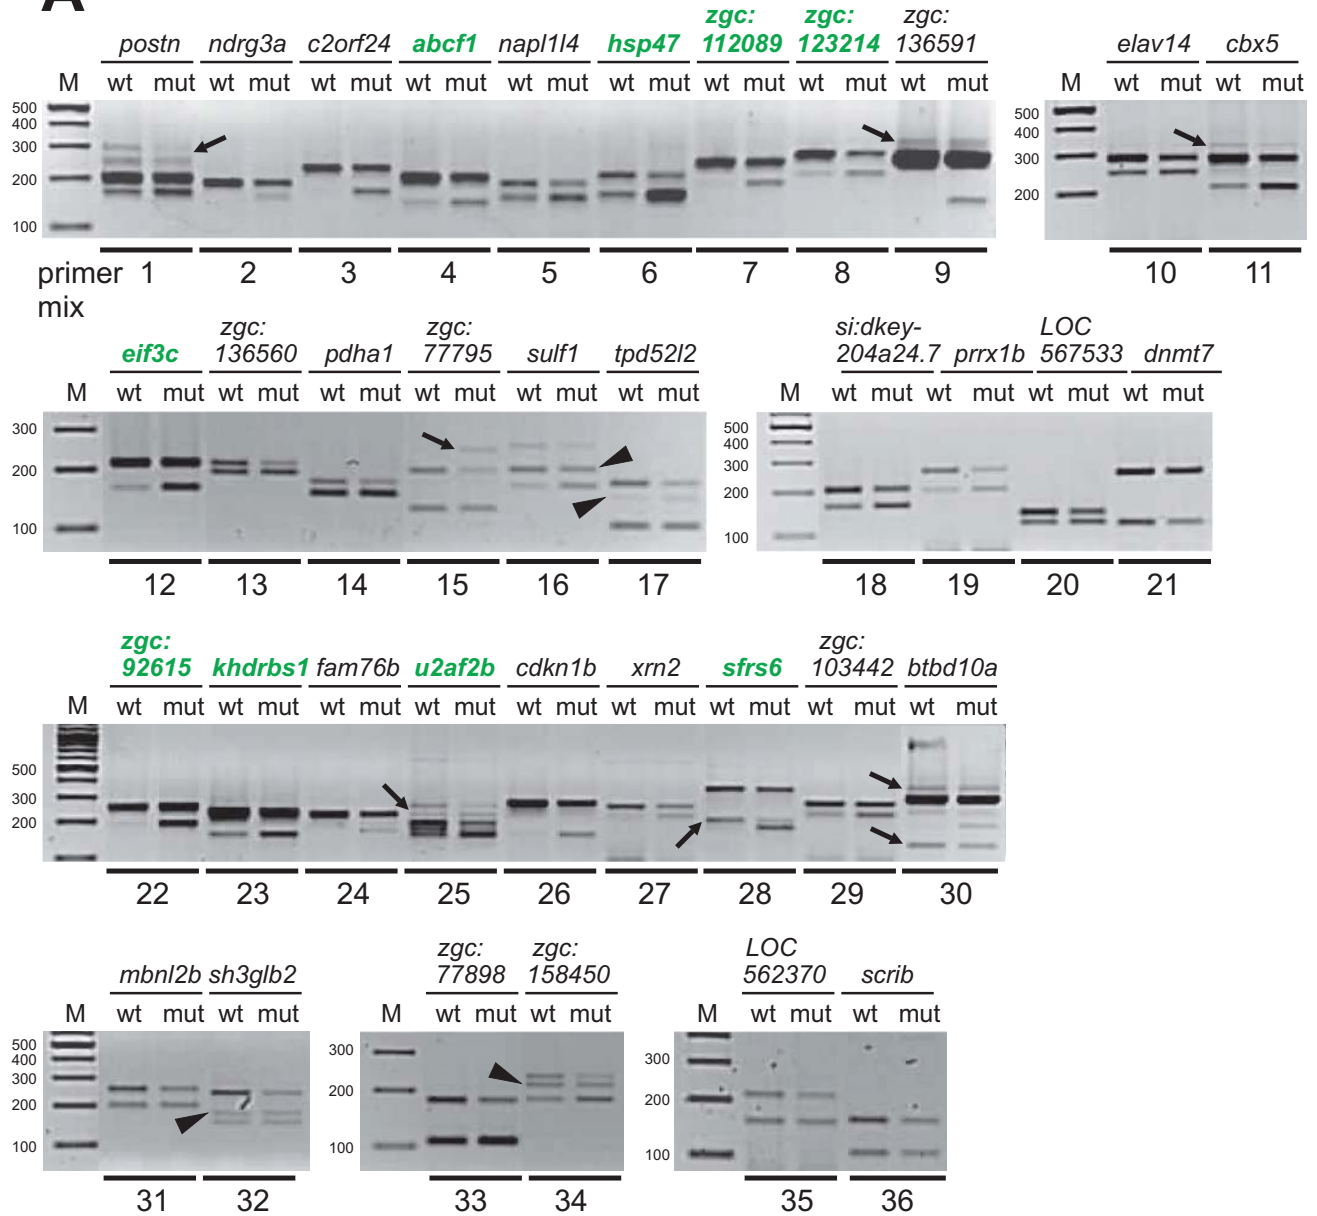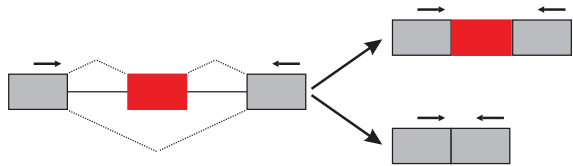

# Supplementary Figure S2BC Rösel *et al.*

## B

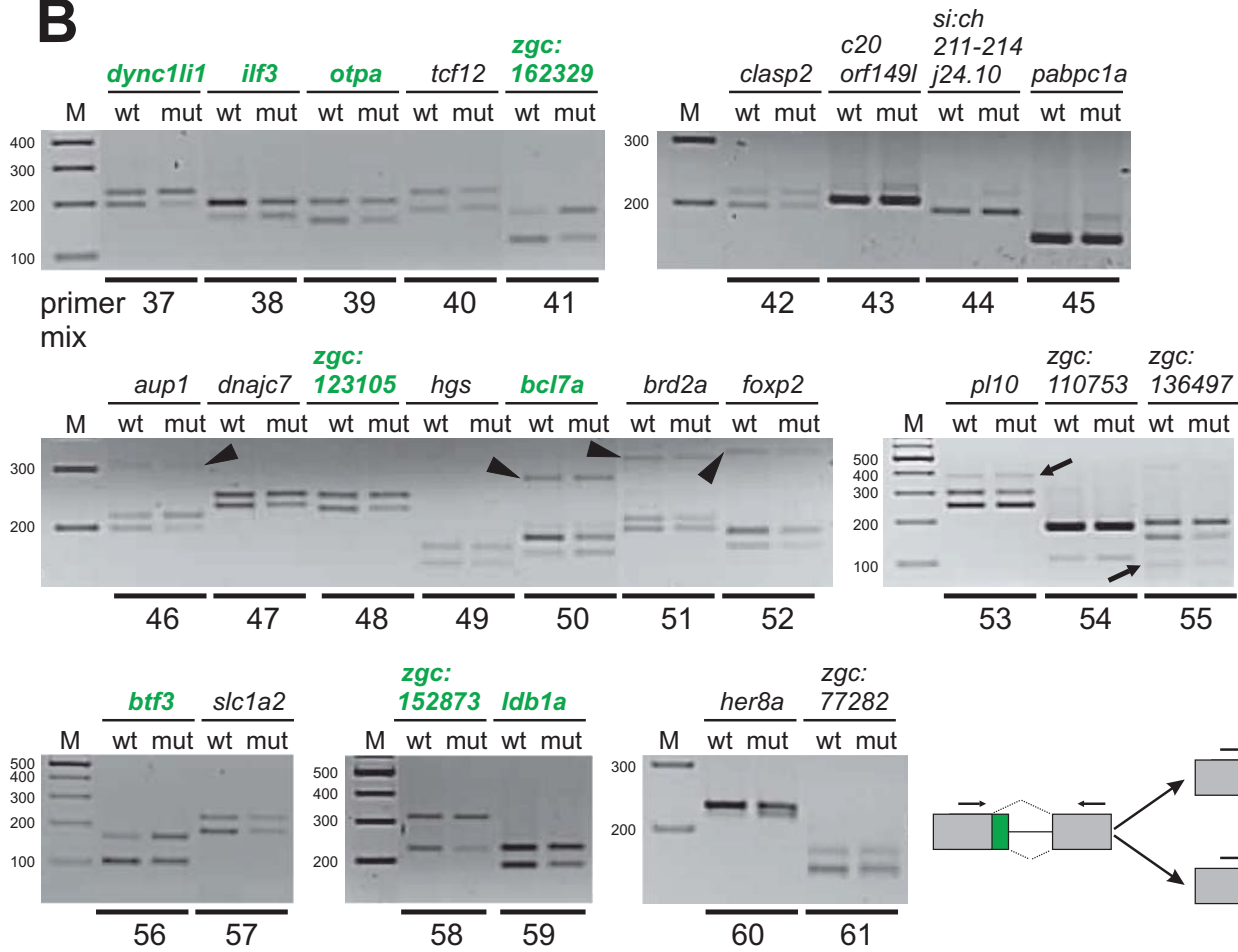

## C

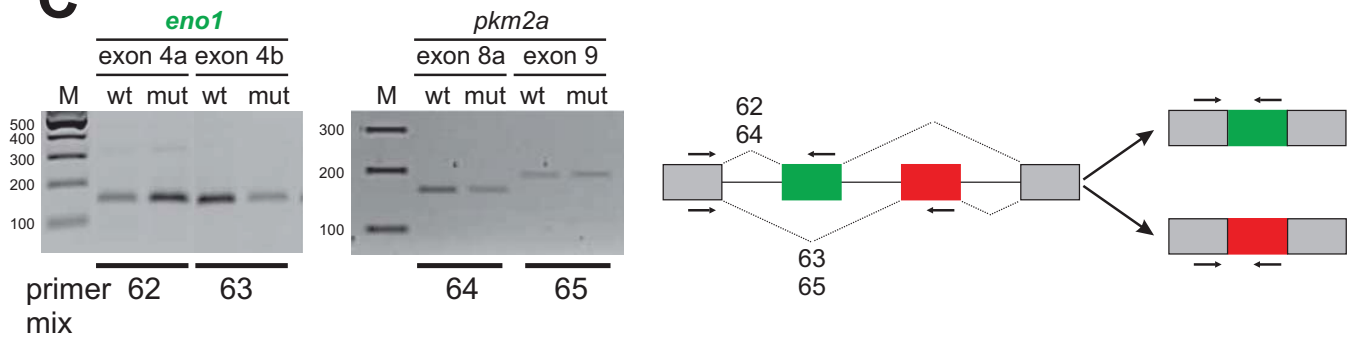

# Supplementary Figure S2D Rösel *et al.*

## D

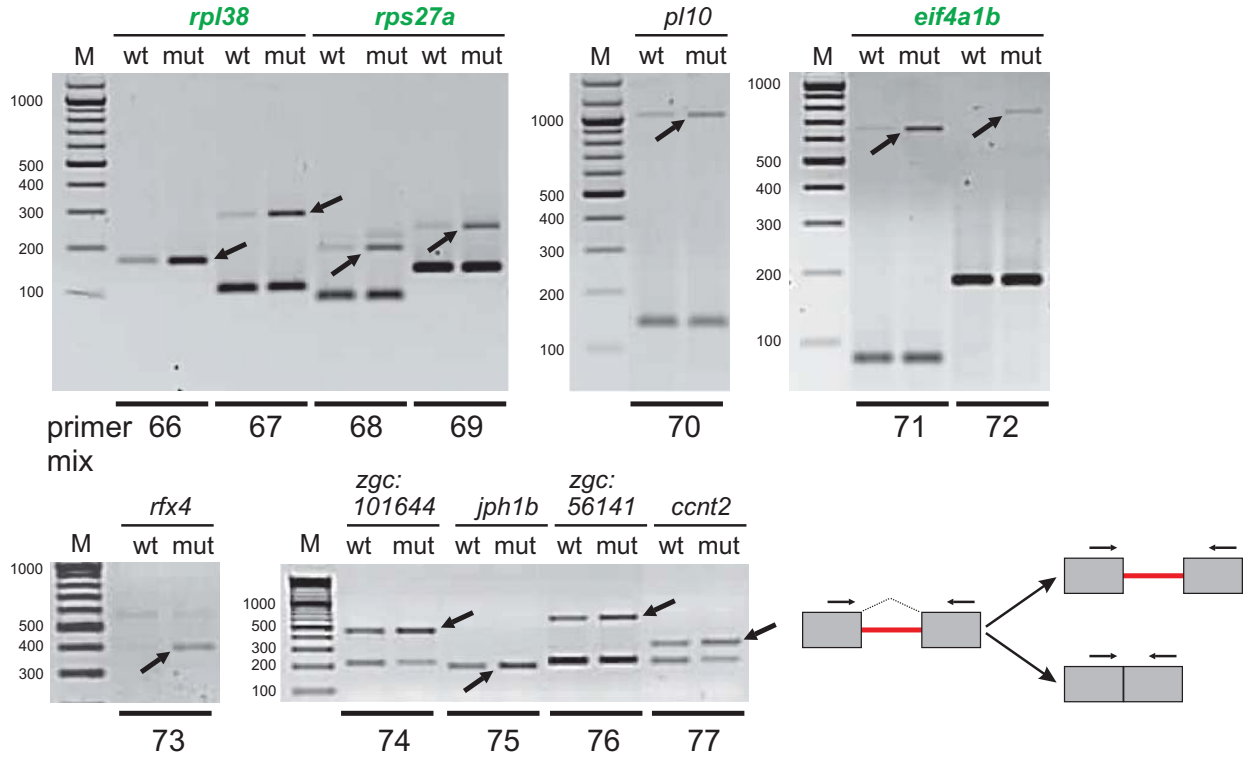

- RT controls

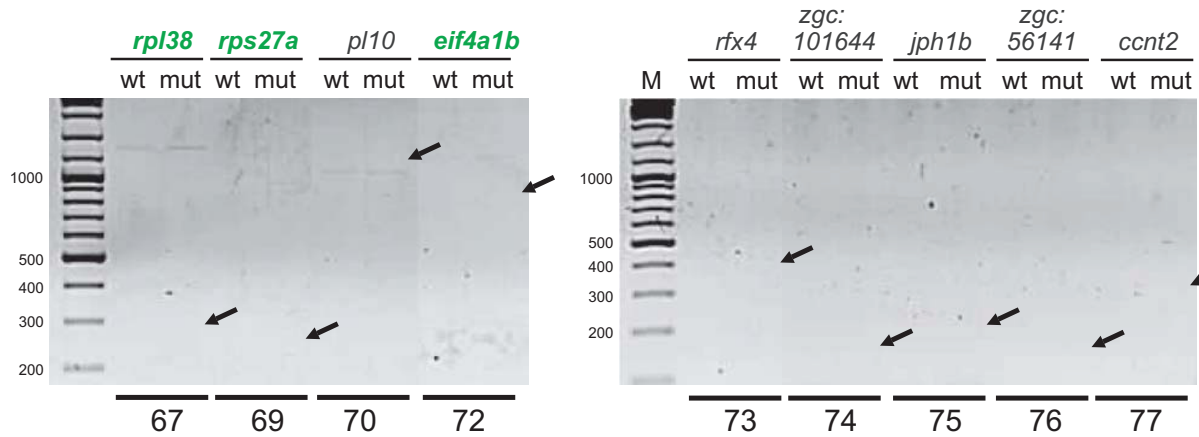

## Supplementary Figure S3 Rösel *et al.*

### Supplementary Figure S3.

#### U1C knockdown in HeLa cells reproduces U1C-dependent alternative splicing changes in zebrafish and reveals functional role of associated U-rich elements (biological replicates).

(A-B) Minigene constructs of four zebrafish target genes (*zgc:112089*, *c2orf24*, *zgc:162329*, and *ilf3*; as indicated above the panels) were transfected into HeLa cells after siRNA-mediated knockdown of U1C ( $\Delta$ U1C) or luciferase ( $\Delta$ Luc, as control). U1C knockdown efficiencies were assessed by Western blot analysis of whole cell lysates, detecting U1C and  $\gamma$ -tubulin (upper two panels). The splicing patterns were analyzed by RT-PCR on total RNA (lower panels), using specific primer sets (indicated by arrows in the schematics). The identities of the splicing products are depicted on the right of the gels. *M*, DNA size markers in bp.

(A) *In vivo* alternative splicing of two exon-skipping targets, *zgc:112089* (top), and *c2orf24* (bottom). For both genes the wildtype (wt) and a mutant construct (mut) were analyzed in replicates: two wt and mut replicates for *zgc:112089* and two wt and mut replicates for *c2orf24*. As shown in the schematics on the right (*zgc:112089*) and below (*c2orf24*), the U-rich elements (green boxes) located downstream of the 5' splice site of the middle exons were mutated to C-rich elements. Exon skipping ratios are given in % below each lane. The asterisk (*zgc:112089*) points to an unspecific PCR product.

(B) *In vivo* splicing of two examples for alternative 5' splice site choice, *zgc:162329* (left) and *ilf3* (right); for *ilf3*, the wildtype (wt) and a mutant construct (mut) were analyzed. Shown are one wt replicate for *zgc:162329* and one wt and mut replicates for *ilf3*. In the mutant construct of *ilf3*, the U-stretch (green box in the schematic below) downstream of the proximal 5' splice site was substituted by a C-stretch. The use of the distal 5' splice site is quantitated in % below each lane.

# Supplementary Figure S3 Rösel *et al.*

## A *zgc:112089*

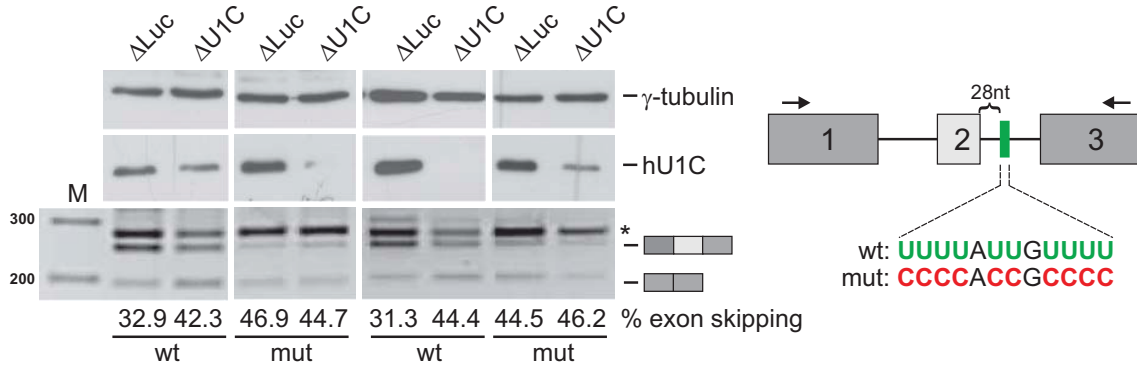

## *c2orf24*

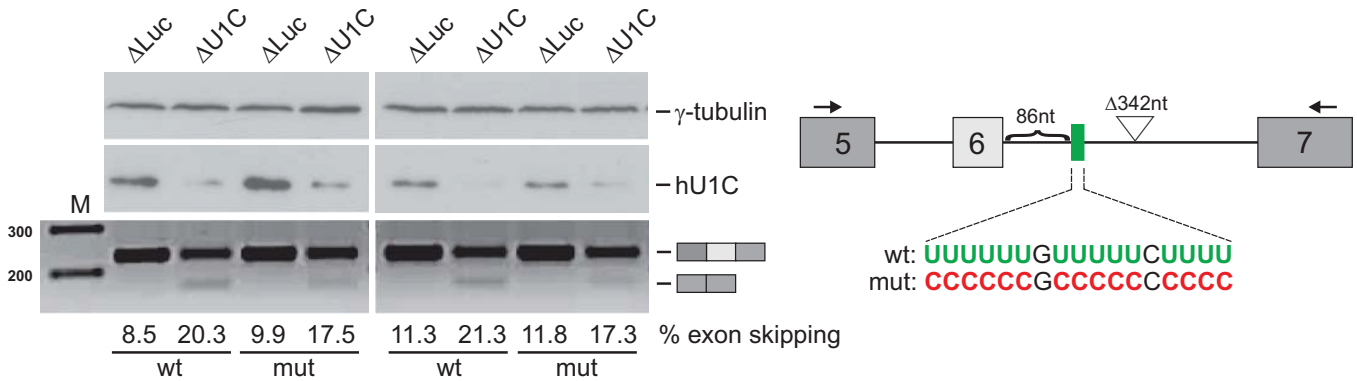

## B *zgc:162329*

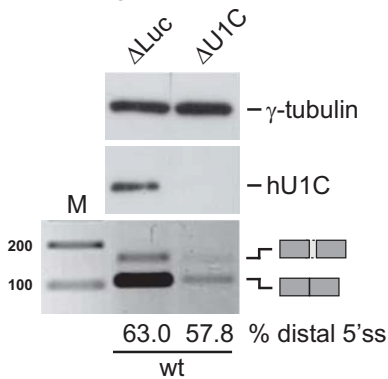

## *ilf3*

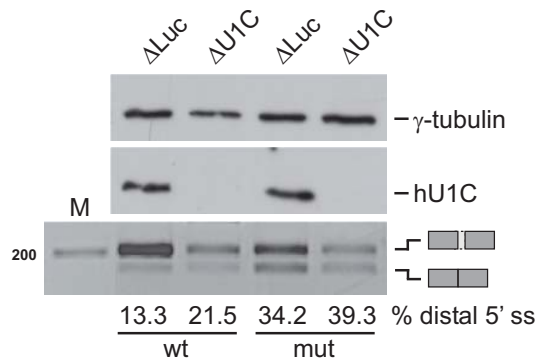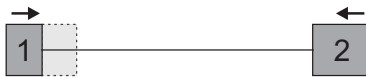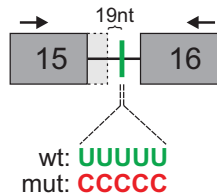



# Supplementary Figure S4 Rösel *et al.*

## Supplementary Figure S4.

### U1C knockdown in HeLa cells results in a U1C-deficient but stable U1 snRNP.

**(A)** Western blot of U1C knockdown in HeLa cells. 24, 48 and 72 h after siRNA transfection into HeLa cells, whole cell lysates were prepared from luciferase control ( $\Delta$ Luc) and U1C knockdown ( $\Delta$ U1C) cells, followed by SDS-PAGE and Western blot analysis for U1C and  $\gamma$ -tubulin. The asterisk marks an unspecific signal.

**(B)** Steady-state levels of the spliceosomal snRNAs. 50 ng to 200 ng of total RNA (as indicated above the lanes) from either control- ( $\Delta$ Luc) or U1C-knockdown ( $\Delta$ U1C) cells were analyzed by Northern blotting with probes specific for U1, U2, U4, U6, and, as a loading control, 5S rRNA (as marked on the right).

**(C)** Affinity purification of the U1 snRNP after U1C-knockdown. Whole-cell lysates from either control- ( $\Delta$ Luc) or U1C-knockdown cells ( $\Delta$ U1C) were used for affinity purification of the U1 snRNP, using a 2'-O-methyl-RNA antisense oligonucleotide. The total input lysate, the depleted lysate, and the affinity-selected material (lanes *input*, *depleted*, *purified*; portions tested are indicated in % above the lanes) were analyzed by Northern blotting for U1, U2, U4, and U6 snRNAs, and, as a loading control, for 5S rRNA (marked on the right). In addition, U1C and U1-70K were detected in the affinity-selected material by Western blot.

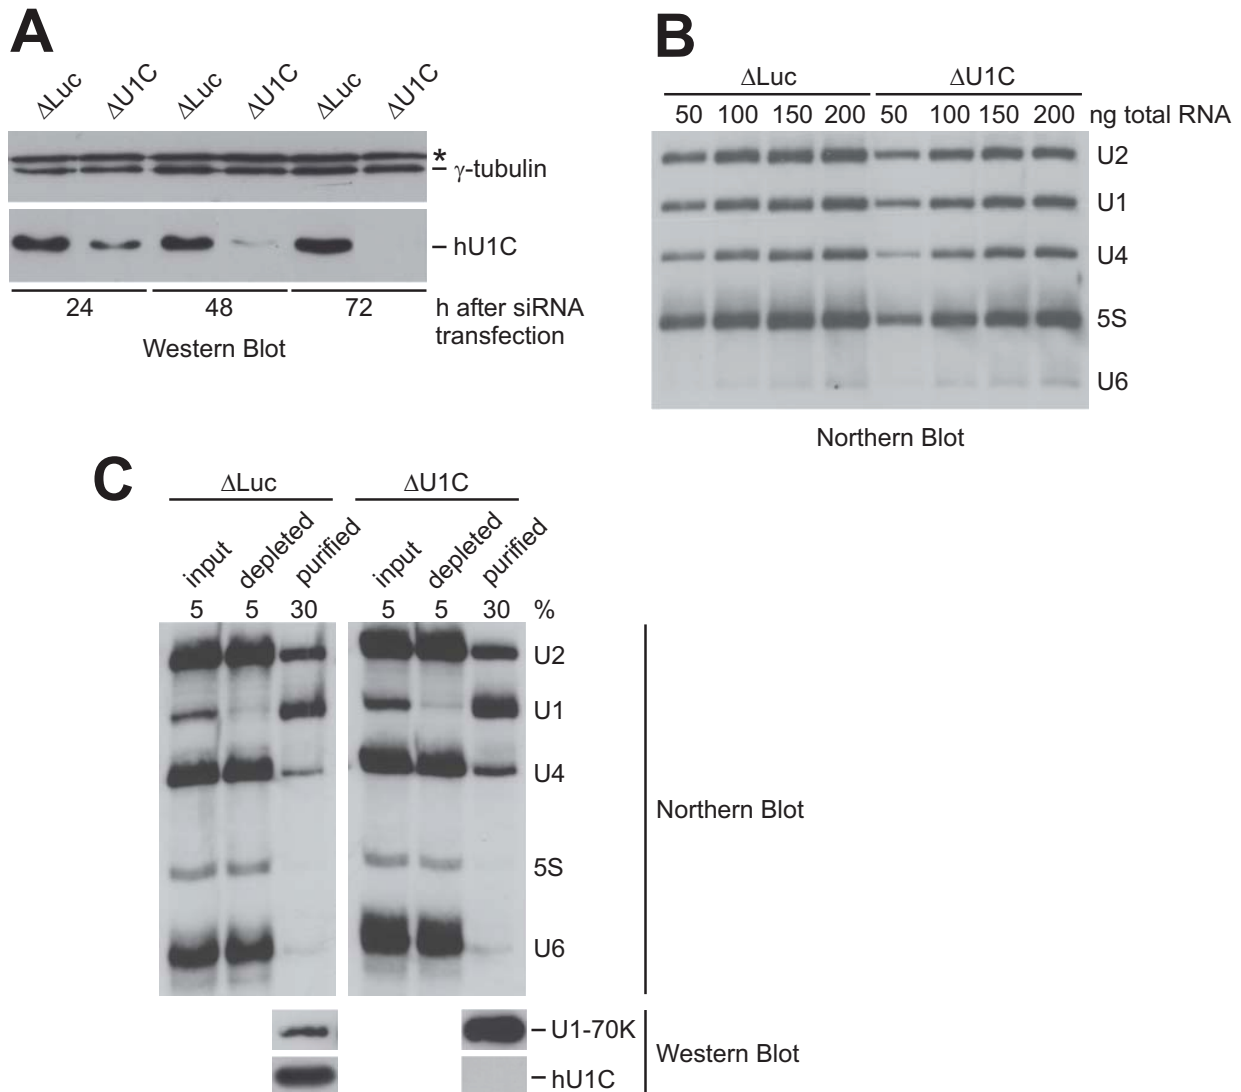

# Supplementary Figure S5 Rösel *et al.*

## Supplementary Figure S5.

### Morpholino-mediated knockdown of U1 snRNA in HeLa cells does not change the alternative splicing patterns of zebrafish-derived U1C target genes.

(A-B) Minigene constructs of four zebrafish target genes (*c2orf24*, *zgc:112089*, *ilf3*, and *zgc:162329*; as indicated below the panels) were transfected into HeLa cells after U1 snRNA knockdown; antisense morpholinos directed against the 5' end of the U1 snRNA (U1) or an unspecific control morpholino (Ctr) had been transfected 8 h before minigene transfection. The efficiency of morpholino blocking of the U1 snRNA was determined by Rnase H protection, using an antisense DNA oligomer binding to the 5' end of the U1 snRNA and silver staining (upper panels). Positions of the full-length U1 (uncut), U1 snRNA after Rnase H digestion (cut), U2, and U4 snRNAs are marked in the middle; the asterisk points to an unidentified band. Minigene splicing was analyzed by RT-PCR on total RNA, using specific primer sets (see panels and schematics on the right). RT-PCR reactions of two independent experiments for each minigene construct are shown, and the identities of the splicing products are depicted in the middle of the gels. *M*, DNA size markers in bp.

(A) *In vivo* alternative splicing of two exon-skipping targets, *c2orf24* (lanes 1-8), and *zgc:112089* (lanes 9-12). Exon skipping ratios for *c2orf24* could not be determined (n.d., skipped form not detectable) and for *zgc:112089* values are given in % below each lane. For *c2orf24*, the wildtype (wt, lanes 1/2 and 5/6) and a mutant construct were analyzed (mut, lanes 3/4 and 7/8; for details on the mutant construct, see **Supplementary Figure S3**). The asterisk points to an unspecific PCR product.

(B) *In vivo* splicing of two examples for alternative 5' splice site choice, *ilf3* (lanes 1-8), and *zgc:162329* (lanes 9/10). The use of the distal 5' splice site is quantitated in % below each lane. For *ilf3*, the wildtype (wt, lanes 1/2 and 5/6) and a mutant construct were analyzed (mut, lanes 3/4 and 7/8; for details on the mutant construct see **Supplementary Figure S3**); the asterisk marks an unspecific PCR product. In lane 6 (silver gel) the RNA was partially degraded during lysate preparation and/or RNase H treatment; however, the total RNA used for RT-PCR was isolated directly from the cells and therefore not affected by degradation.

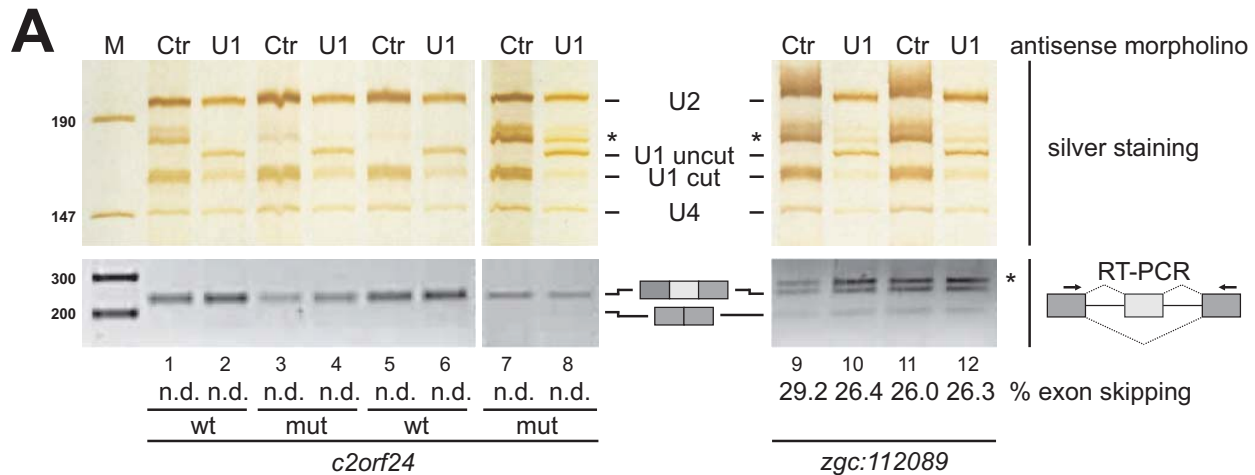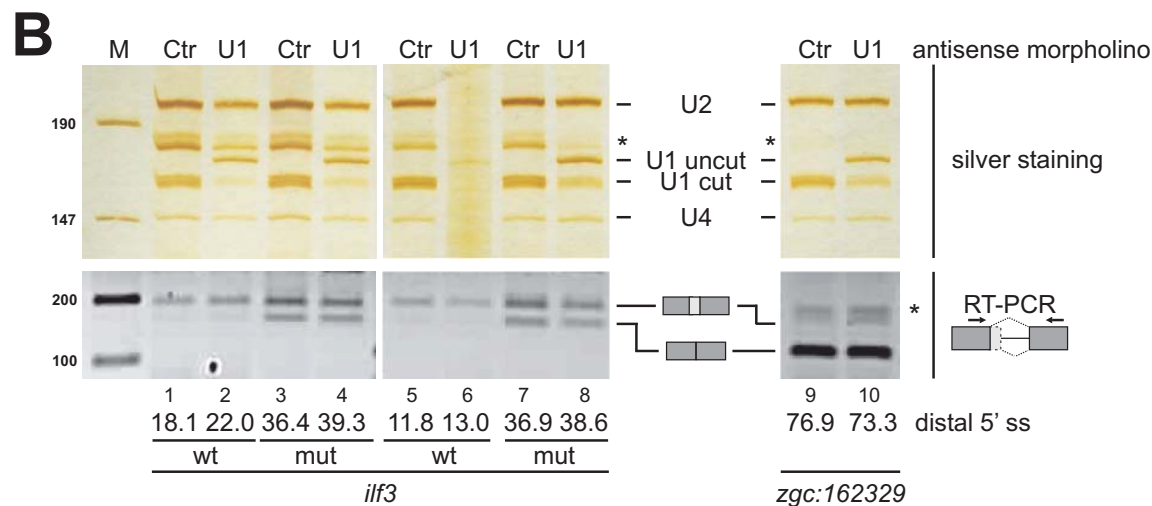

# Supplementary Figure S6 Rösel *et al.*

## Supplementary Figure S6.

### Alternative splicing of human orthologs of zebrafish-derived U1C target genes is not U1C-regulated in HeLa cells.

The alternative splicing patterns of 9 human genes orthologous to zebrafish-derived U1C target genes (names above the lanes) were analyzed by RT-PCR, using total RNA from HeLa cells after siRNA-mediated knockdown of U1C ( $\Delta$ U1C) or luciferase ( $\Delta$ Luc, as control) and specific primer sets (arrows in the schematics on the right). The open circles mark the exon inclusion, the closed circles the exon skipping products; the asterisks point to primer dimers. Labeled in bold are three genes (*SNRNP27*, *CDKN1B*, and *TPD52L2*) that were also validated in the zebrafish system (cf. **Supplementary Figure S2A**, genes *zgc:92615*, *cdkn1b*, and *tpd51l2*, respectively). *M*, DNA size markers in bp.

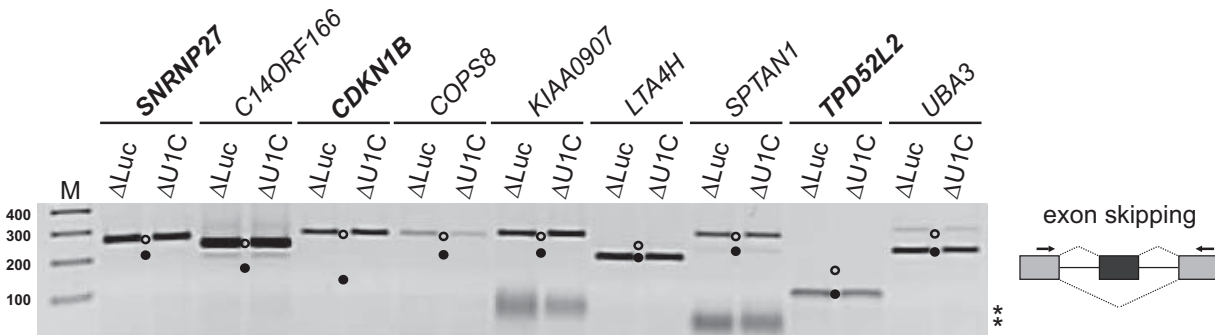

## SUPPLEMENTARY METHODS

This document is a companion to the paper:

Tanja Rösel, Lee-Hsueh Hung, Jan Medenbach, Katrin Donde, Stefan Starke, Vladimir Benes, Gunnar Rättsch, and Albrecht Bindereif

RNA-Seq analysis in mutant zebrafish reveals role of U1C protein in alternative splicing regulation

It describes the methods und results of the RNA-Seq data analysis.

### Contents

|                                                            |    |
|------------------------------------------------------------|----|
| 1. Annotation of refGene and its junction sequences        | 2  |
| 2. Sequence alignment and mapping                          | 2  |
| 3. Gene expression analysis                                | 4  |
| 4. Alternative splicing target detection                   | 5  |
| 4.1 Single-exon skipping                                   | 6  |
| 4.2 Multiple-exon skipping                                 | 7  |
| 4.3 Intron retention                                       | 8  |
| 4.4 Alternative 5' and 3' splice sites                     | 8  |
| 4.5 Mutually exclusive exons                               | 9  |
| 5. Sequence motif analysis of single-exon skipping targets | 15 |
| 6. References                                              | 17 |

## 1. Annotation of refGene and its junction sequences

The Zv7 assembly of the Zebrafish genome (danRer5) was used for genomic sequence alignment. To analyze gene expression and alternative splicing changes in the U1C mutant zebrafish, we concentrated on the annotated genes with well-defined exon/intron structure, and built a zebrafish refGene junction database for further analysis. The following data were downloaded from the UCSC annotation database (<http://hgdownload.cse.ucsc.edu/goldenPath/danRer5/database/>): refGene, all\_mran and all\_est.

First, we selected unique (single-copy) refGenes in chromosomes 1-25. Junction sequences and annotation (upstream and downstream exon positions) were built by collecting

- refseq mRNA junctions,
- junctions skipping one refSeq mRNA exon,
- junctions alternatively spliced in all\_mrna and all\_est data,

In sum, our dataset covers 11,809 refGenes and 322,925 junctions (**Figure 1**).

**Figure 1. Collection of junction sequence data**

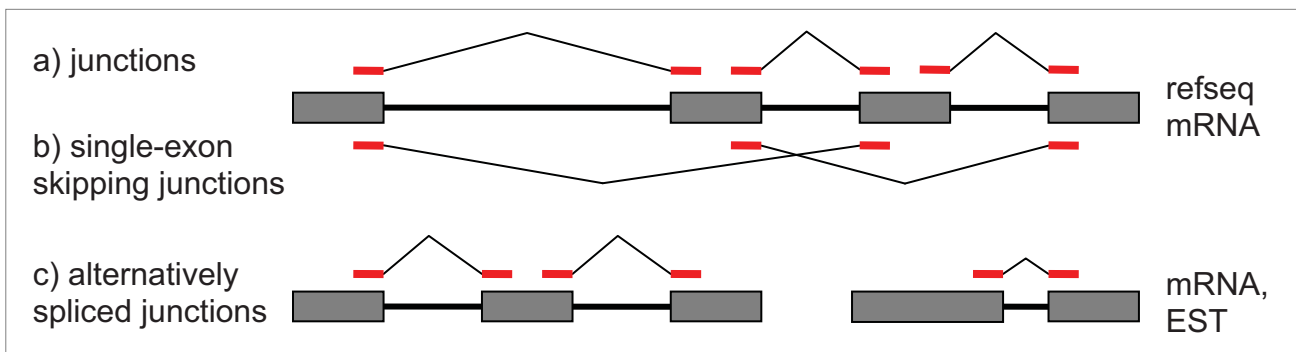

## 2. Sequence alignment and mapping

The number of total sequence reads (76 bp, single-end), which passed the standard parameter of Solexa's quality control from mutant (*-mut-* in the following text) and wildtype (*-wt-* in the following text) zebrafish samples were 31,821,414 (*mut*) and 35,497,176 (*wt*). These sequences were aligned to zebrafish genomic sequence (chromosomes 1-25) and refGene junction sequence (as described in section 1), using the program bwa (Burrows-Wheeler Alignment) version 0.4.6 (<http://bio-bwa.sourceforge.net/>, Li *et al.*, 2009). Standard parameters were selected, allowing 4 mismatches per 76-bp sequence.

From the genomic sequence alignment, reads were selected for further downstream analysis, based on the following criteria:

- Reads aligning uniquely to one chromosome position, but not over junction, and
- Reads aligning within the refGene region.

From the junction sequence alignment, reads aligning uniquely to junction sequence, but not genomic sequence, were selected for further downstream analysis.

In addition to the known junction sequence alignment, we also performed an unbiased alignment to look for novel junctions. For this we identified partial matches of each read to the genome of at least 35bp, using a modified version of GenomeMapper (Schneeberger *et al.*, 2009). For each such match we considered the genomic region of 10 kb each upstream and downstream of the match. We performed an intron-aware Smith-Waterman alignment of the read to this region, employing QPALMA (De Bona *et al.*, 2008), and reported alignments with at most six mismatches and two indels. We required the conventional splice site consensus dinucleotides (GT or GC for the 5', and AG for the 3' splice sites) for alignments over (predicted) intron junctions. Since the standard Solexa RNA-Seq protocol is not strand-sensitive, all reads were aligned to both strands and the best as well as suboptimal alignments were reported. In order to increase computational efficiency, we only selected junction sequences with an exact match of at least 12 bp on either side (Sonnenburg *et al.*, 2007). The strategy is capable of identifying intron junctions, if they are at least 12nt away from the read boundary, or if other evidence suggests to include the intronic region in the subsequence considered for the QPALMA alignment. The strategy described is implemented in the Palmapper software (Jean *et al.*, 2010) available at <http://ftp.tuebingen.mpg.de/fml/raetsch-lab/software/palmapper>).

Using the algorithm described we obtained alignments for 79.0% and 77.5% for all mutant and wildtype reads, respectively. On average, 28.2% of all alignments were spliced, i.e. spanned at least one predicted intron.

Uniquely mapped reads were defined as refGene transcript, ignoring antisense transcripts here. In sum, ~ 30 mil. reads (~ 45% of the total reads) aligned uniquely to the refGene genomic sequence or junction sequence, among them ~ 35 % spanned a junction. The table below summarizes the alignment results:

|            | total sequence reads | reads selected (in refGene) | selected / total reads | non-junction reads | junction reads | junction reads / selected reads |
|------------|----------------------|-----------------------------|------------------------|--------------------|----------------|---------------------------------|
| <b>mut</b> | 31,821,414           | 14,411,654                  | 45 %                   | 9,309,611          | 5,102,043      | 35 %                            |
| <b>wt</b>  | 35,497,176           | 15,702,952                  | 44 %                   | 10,333,440         | 5,369,512      | 34 %                            |

|            | junction reads recovered from unbiased alignment (novel junctions) | novel junction reads / total junction reads |
|------------|--------------------------------------------------------------------|---------------------------------------------|
| <b>mut</b> | 327,983                                                            | 6.4 %                                       |
| <b>wt</b>  | 211,513                                                            | 4.0 %                                       |

All selected reads were mapped to each refGene genomic region, and  
a) **read-density**  
b) **junction-count**  
were calculated for the downstream analysis (**Figure 2**).

**Figure 2. Calculation of junction-count and read-density**

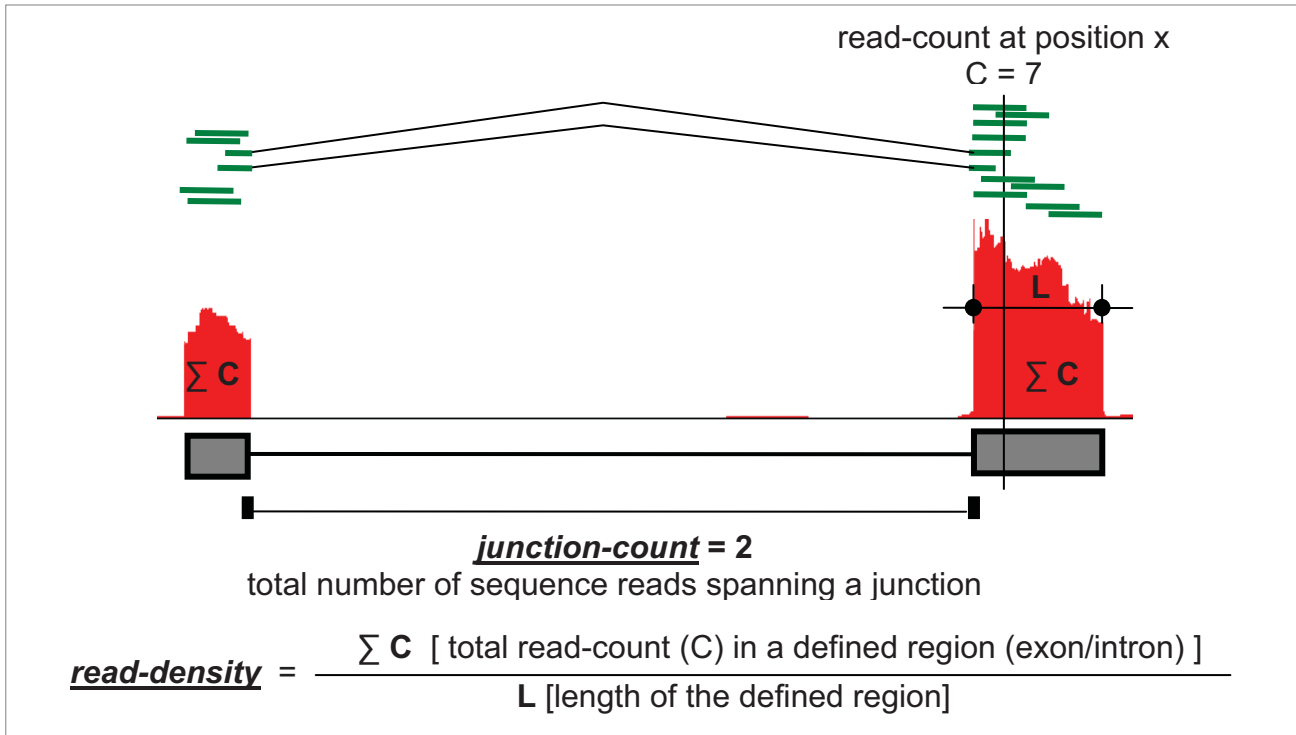

### 3. Gene expression analysis

The transcripts of refseq mRNA from the refGenes were used to analyze and compare gene expression levels between mutant and wildtype zebrafish samples. Transcripts containing at least 1 read in either *mut* or *wt* were selected. First we calculated the **read-density** of these 11,651 transcripts by adding up all read-counts of refseq mRNA exons, and divided this value by the length of mRNA in nucleotides. The ratio of transcript **read-density** between *mut* and *wt* reflects the abundance of the mRNA (gene expression level). Transcripts with **read-density** lower than the 30 % quantile (3.9 in *mut*, 4.4 in *wt*) were defined as not significantly expressed and were removed from further downstream analysis. Here we assumed that ~ 70% of the annotated genes are expressed during the first 3 days of zebrafish embryonic development. The **read-density** in *wt* was normalized by the factor 0.92, which is the ratio of total selected reads between *mut* and *wt*.

The package edgeR (differential expression analysis of digital gene expression data) from Bioconductor (<http://www.bioconductor.org>) was used to determine the significance of gene up- and downregulation. We chose the Benjamini and Hochberg method (Benjamini and Hochberg, 1995) for controlling the false discovery rate (FDR) of hypothesis tests, which is a powerful method for correcting multiple comparisons. Among the 8,463 expressed genes (8,556 transcripts) analyzed, 437 genes (**Supplementary Table S1**) were upregulated, and 293 genes (**Supplementary Table S2**) were downregulated with adjusted-p values lower than 0.05.

## 4. Alternative splicing target detection

To detect alternative splicing events, we looked for the following 5 patterns (see sections 4.1 - 4.5) and collected the **read-density** and **junction-count** information around the alternatively spliced regions to determine whether a quantitative change of the alternative isoforms between **mut** and **wt** was significant.

To avoid the isoforms, which were at background expression levels or lacked the complete upstream or downstream exon/intron information, we set a minimal **junction-count** for the non-refseq (mRNA/est/novel) junctions of

a) 5 for **mut**,

b) 6 for **wt**.

This cut-off was based on the quantile distribution of **junction-count** of the 322,925 annotated junctions in **mut** and **wt** shown below.

|            | 0 % | 10 % | 20 % | 30 % | 40 % | 50 % | 60 % | 70 % | 80 % | 90 % | 100 %  |
|------------|-----|------|------|------|------|------|------|------|------|------|--------|
| <b>mut</b> | 0   | 0    | 0    | 0    | 0    | 1    | 1    | 1    | 5    | 18   | 28,349 |
| <b>wt</b>  | 0   | 0    | 0    | 0    | 0    | 0    | 1    | 1    | 6    | 21   | 30,667 |

In addition to the minimal **junction-count**, we also set a minimal **read-density** of

a) 3.9 for **mut**,

b) 4.4 for **wt** (defined in section 3),

to determine whether a particular region (an exon or intron) is expressed or not.

The following subsections describe further details and criteria for target selection of the 5 alternative splicing modes, based on the following general rules and procedures:

a) The RNA-Seq protocol and the alignment procedure are biased, since random fragmentation and priming efficiency are sequence-dependent, as well as read selection of unique mapping with 76-bp read length. As shown in **Figure 5**, the read-count across each exon varies and the **read-density** of each exon within a gene differs. In order to detect significant changes of a particular exon or intron region, it therefore would be better to rely on the fold change of the **read-density** and **junction-count** in a limited region of the gene. The two exons flanking the alternative splicing event were selected to represent the constitutive region, providing the basis for comparison.

b) **Read-density** and **junction-count** information was collected in the constitutive and alternative exon region. The **wt** values were normalized with the **mut** to **wt** ratio of total reads in the corresponding refGene to correct for differences in total sequenced read number and transcription rate between **mut** and **wt**. In general, the read-count values in the first and last exon were relatively inconsistent. If the up-/downstream constitutive exon was the first or last exon and longer than 70 bp, only a 70-bp exonic region next to the splice site was used for calculating its read density, in order to reduce the degree of variation.



c) Basically, there are two sets of information, which contain the **read-density** and **junction-count** values, each of them indicating the quantity of one particular isoform. The fold change ( $FC = \log_2 \text{mut/wt}$ , used in the entire analysis) of each value indicates a relative increase ( $FC > 0$ ) or decrease ( $FC < 0$ ) of one particular splice form in **mut** vs. **wt**. Since the absolute values as well as the corresponding fold changes of the supporting information varied to a relatively high degree, we had to apply different parameters for target selection. In general, the higher the stringency of the selection criteria is, the lower the false positive and the higher the false negative rate will be.

The junction information is more reliable to predict whether an alternatively spliced isoform is expressed. We therefore started with the selection of significant junctions. From all junctions annotated in the 8,463 expressed genes (see section 3), we looked for refSeq junctions with at least one **junction-count** in **mut** or **wt**; and for non-refSeq junctions with a minimal **junction-count** as defined above. In sum, 84,885 junctions were selected. The package edgeR was used to calculate the fold change and p-value and to determine the significance of changes in each junction between **mut** and **wt** (**list\_A**). The following sections describe the target selection of 5 different alternative splicing modes, which all start with the junction information in **list\_A**.

## 4.1 Single-exon skipping

We started with the most frequent alternative splicing event, single-exon skipping. The shift of exon skipping vs. inclusion between **mut** and **wt** was detected by combining the **read-density** and **junction-count** values within a 3-exon context (**Figure 3**).

Based on significant **junction-count** of exon skipping and exon inclusion junctions we can predict that two isoforms exist that are experimentally detectable. Taking the junctions in **list\_A**, we looked for a set of 3 junctions containing one exon skipping and two exon inclusion junctions with constitutive up-/downstream exons and one alternative exon. We calculated the **read-density** of constitutive exons (**RD-constit**) and alternative exon (**RD-alt**), the fold change of each exon, and the difference of fold change between **RD-alt** and **RD-constit** (which is the average of the two flanking constitutive exons). This yields the first exon inclusion information (**incl\_1**). The fold change of **junction-count** from the two inclusion junctions give the second (**incl\_2**) and third (**incl\_3**) inclusion information. The skipping information is obtained from the fold change of **junction-count** in skipping junction (**skip**).

Ideally, a significant reciprocal effect between skipping and inclusion information indicates a quantitative shift of the two isoforms between **mut** and **wt**. As shown in **Figure 3**, increased values of skipping information (**skip**) and decreased values of inclusion information (**incl\_1-3**) predict the increased exon skipping isoform in **mut**. On the other hand, decreased values of skipping information and increased values of inclusion information predict the increased exon inclusion isoform in **mut**.

Two controls for data filtering were applied to all 5 sections (4.1 – 4.5) with the following parameters:

**Read-density-control:** The **RD-constit** in both *mut* and *wt* is above the minimal **read-density**, and the difference of fold change between up- and downstream exons is not greater than 0.3. The **RD-alt** in *mut* or *wt* is above the minimal **read-density**. This control filtered out the very low (in background level) expressed isoforms and provided the evidence that the up-/downstream exons are constitutive.

**Junction-ratio-control:** The ratio of **junction-count** values between two groups (inclusion or skipping junctions) should be no less than 0.05. This control filtered out alternative isoforms that are expressed at very low levels, which may experimentally not be detectable.

We use *mut+* to illustrate an increase of the exon skipping isoform in *mut*, and *wt+* in *wt* in the single-/multiple-exon skipping analysis. Targets were selected according to one of the following criteria:

a) If the fold change of **junction-count** of skipping junction (**skip**) has a p-value less than 0.05, this strongly indicates a change of exon skipping form. Exon skipping targets were selected based on the following values of the skipping/inclusion information.

|               |                  |                       |                       |                       |
|---------------|------------------|-----------------------|-----------------------|-----------------------|
| <i>mut+</i> : | <b>skip</b> > 0; | <b>incl_1</b> < 0.2;  | <b>incl_2</b> < 0.2;  | <b>incl_3</b> < 0.2;  |
| <i>wt+</i> :  | <b>skip</b> < 0; | <b>incl_1</b> > -0.2; | <b>incl_2</b> > -0.2; | <b>incl_3</b> > -0.2. |

b) If there is not enough information provided from skipping junction (p-value of **skip** > 0.05), we relied on the information from the two inclusion junctions. If either **incl\_2** or **incl\_3** has a p-value less than 0.05 and the other has a p-value less than 0.2, exon skipping targets were selected based on the following values.

|               |                     |                       |                       |                       |
|---------------|---------------------|-----------------------|-----------------------|-----------------------|
| <i>mut+</i> : | <b>skip</b> > 0.5;  | <b>incl_1</b> < -0.5; | <b>incl_2</b> < -0.5; | <b>incl_3</b> < -0.5; |
| <i>wt+</i> :  | <b>skip</b> < -0.5; | <b>incl_1</b> > 0.5;  | <b>incl_2</b> > 0.5;  | <b>incl_3</b> > 0.5.  |

c) If none of the junctions indicates a significant change (p-value of all three > 0.05), we relied on the information from the fold change of **read-density** in alternative exon, and selected targets based on the following values.

|               |                     |                       |                       |                     |
|---------------|---------------------|-----------------------|-----------------------|---------------------|
| <i>mut+</i> : | <b>incl_1</b> < -1; | <b>incl_2</b> < -0.2; | <b>incl_3</b> < -0.2; | <b>skip</b> > 0.2;  |
| <i>wt+</i> :  | <b>incl_1</b> > 1;  | <b>incl_2</b> > 0.2;  | <b>incl_3</b> > 0.2;  | <b>skip</b> < -0.2. |

**Supplementary Table S3** lists 218 targets predicted with increased exon skipping in *mut* and 12 in *wt*. Among the 218 *mut+* targets, 31 were selected and positively validated by RT-PCR.

## 4.2 Multiple-exon skipping

To detect alternative splicing events involving multiple-exon skipping, the methods we applied were similar to single-exon skipping described in section 4.1. Taking the junctions in *list\_A*, we looked for a set of junctions containing one exon skipping and more than two exon inclusion junctions with constitutive up-/downstream exons and multiple alternative exons (**Figure 4**). Only dataset containing two alternative exons were found that passed the two filtering controls. Here we have **incl\_1** (a, b) values from two alternative exons, and **incl\_2/3/4** from three intermediate junctions. Target selection followed the same criteria for single-exon skipping as described in section 4.1.

**Supplementary Table S4** listed 9 targets predicted with increased multiple-exon skipping in *mut* and 1 in *wt*. Among the 9 *mut+* targets, 5 were selected and positively validated by RT-PCR.

### 4.3 Intron retention

To predict intron retention events, we relied on the **junction-count** and the **read-density** of target intron. Taking the junctions in *list\_A*, we selected junctions spanning less than 2000-bp, which have no significant intermediate junction, and obtained the corresponding up-/downstream exons (**Figure 5**). Two parts of information are required, one indicating intron retention, which is the fold change of the intron **read-density (retained)**, the other indicating intron splicing, which is the fold change of the **junction-count (spliced)**.

Positive value of intron retained information and negative of spliced information indicate an increase of intron retention in *mut* (*mut+*). While negative value of intron retained information and positive of spliced information indicate an increase of intron retention in *wt* (*wt+*).

In addition to the two filtering controls, we applied a p-value control (< 0.1) for the fold change of **junction-count**. Targets were predicted by the following criteria:

|               |                          |                     |                                    |
|---------------|--------------------------|---------------------|------------------------------------|
| <i>mut+</i> : | <b>retained</b> > 0.5;   | <b>spliced</b> < 0; | <b>retained – spliced</b> > 0.7;   |
| <i>wt+</i> :  | <b>retained</b> < - 0.5; | <b>spliced</b> > 0; | <b>retained – spliced</b> < - 0.7. |

**Supplementary Table S5** listed 32 targets predicted with an increase of intron retention in *mut* and 12 targets in *wt*. Among the 32 *mut+* targets, 9 were positively validated (from 10 selected) by RT-PCR.

### 4.4 Alternative 5' and 3' splice sites

To predict alternative usage of 5' and 3' splice sites, we needed a pair of junctions with a specific up- (down-) stream position and different positions on the down- (up-) stream positions. Here we set the limits for the distance of the alternative 5' or 3' splice sites to a minimum of 10 bp and a maximum of 150 bp. Taking the junctions in *List\_A*, we obtained 501 pairs of junctions and calculated the **read-density** and **junction-count**, similarly as described in section 4.1 (**Figure 6**).

The same principle applied for alternative 5' and 3' splice site target selection. Here the case of alternative 5' splice sites is illustrated in detail: Two pieces of information are required, one indicating the distal splice site usage, which is the fold change of the distal 5' splice site **junction-count (distal)**, the other indicating the usage of the proximal splice site, which contains the difference of fold change between **RD-alt** and **RD-constit (proximal\_1)** and the fold change of the proximal 5'SS **junction-count (proximal\_2)**. As shown in **Figure 6**, increased values of distal 5' splice site usage information and decreased values of proximal 5' splice site usage information predict the increase of shorter isoform with distal splice site in

*mut*. In analogy, decreased values of distal 5' splice site usage information and increased values of proximal 5' splice site usage information predict the increase of longer isoform with proximal splice site in *mut*.

We use *distal\_mut+* to illustrate an increase of the distal 5' splice site usage in *mut*, and *proximal\_mut+* of the proximal splice site. Targets were selected with the following parameters:

|                        |                                                 |                           |                      |
|------------------------|-------------------------------------------------|---------------------------|----------------------|
| <i>distal_mut+</i> :   | $\text{proximal\_1} < -0.35;$                   | $\text{proximal\_2} < 0;$ | $\text{distal} > 0;$ |
|                        | $(\text{distal} - \text{proximal\_2}) > 0.75;$  |                           |                      |
| <i>proximal_mut+</i> : | $\text{proximal\_1} > 0.35;$                    | $\text{proximal\_2} > 0;$ | $\text{distal} < 0;$ |
|                        | $(\text{distal} - \text{proximal\_2}) < -0.75.$ |                           |                      |

**Supplementary Table S6** lists 43 targets predicted to show a change in alternative 5' splice site usage between *mut* and *wt*; and 12 targets with alternative 3' splice sites. Among the 43 alternative 5' splice site targets, 25 were selected and positively validated by RT-PCR.

## 4.5 Mutually exclusive exons

To detect mutually exclusive exons, we needed two pairs of junctions, one indicating the inclusion of the upstream exon, the other the inclusion of the downstream exon, and both sharing the same up-/downstream constitutive exons. Datasets with this requirement were selected from junctions in *List\_A*. Two groups of information were applied to predict targets as shown in **Figure 7**. One indicates the upstream exon inclusion, which contains the difference of fold change between *RD-alt* (upstream exon) and *RD-constit* (*up\_1*) and the fold change of *junction-count* for the upstream exon inclusion (*up\_2*, *up\_3*). The other indicates the downstream exon inclusion, which contains the difference of fold change between *RD-alt* (downstream exon) and *RD-constit* (*down\_1*) and the fold change of *junction-count* for the downstream exon inclusion (*down\_2*, *down\_3*).

In addition to the two filtering controls, p-value limits were further set here for the junctions flanking the two alternative exons. Targets were selected if either *up\_2* or *up\_3* had a p-value of less than 0.05, and either *down\_2* or *down\_3* had a p-value of less than 0.05. A reciprocal effect between the up-/downstream exon inclusion information provided the evidence of mutually exclusive exons.

- If all values of upstream exon inclusion information (*up\_1*, *up\_2*, *up\_3*) were positive and downstream exon inclusion information (*down\_1*, *down\_2*, *down\_3*) negative, we predicted an increased usage of the upstream alternative exon in *mut*.
- If all values of upstream exon inclusion information (*up\_1*, *up\_2*, *up\_3*) were negative and downstream exon inclusion information (*down\_1*, *down\_2*, *down\_3*) positive, we predicted an increased usage of the downstream alternative exon in *mut*.

**Supplementary Table S7** lists three predicted targets, of which two were selected and positively validated with RT-PCR.

Figure 3. Single-exon skipping

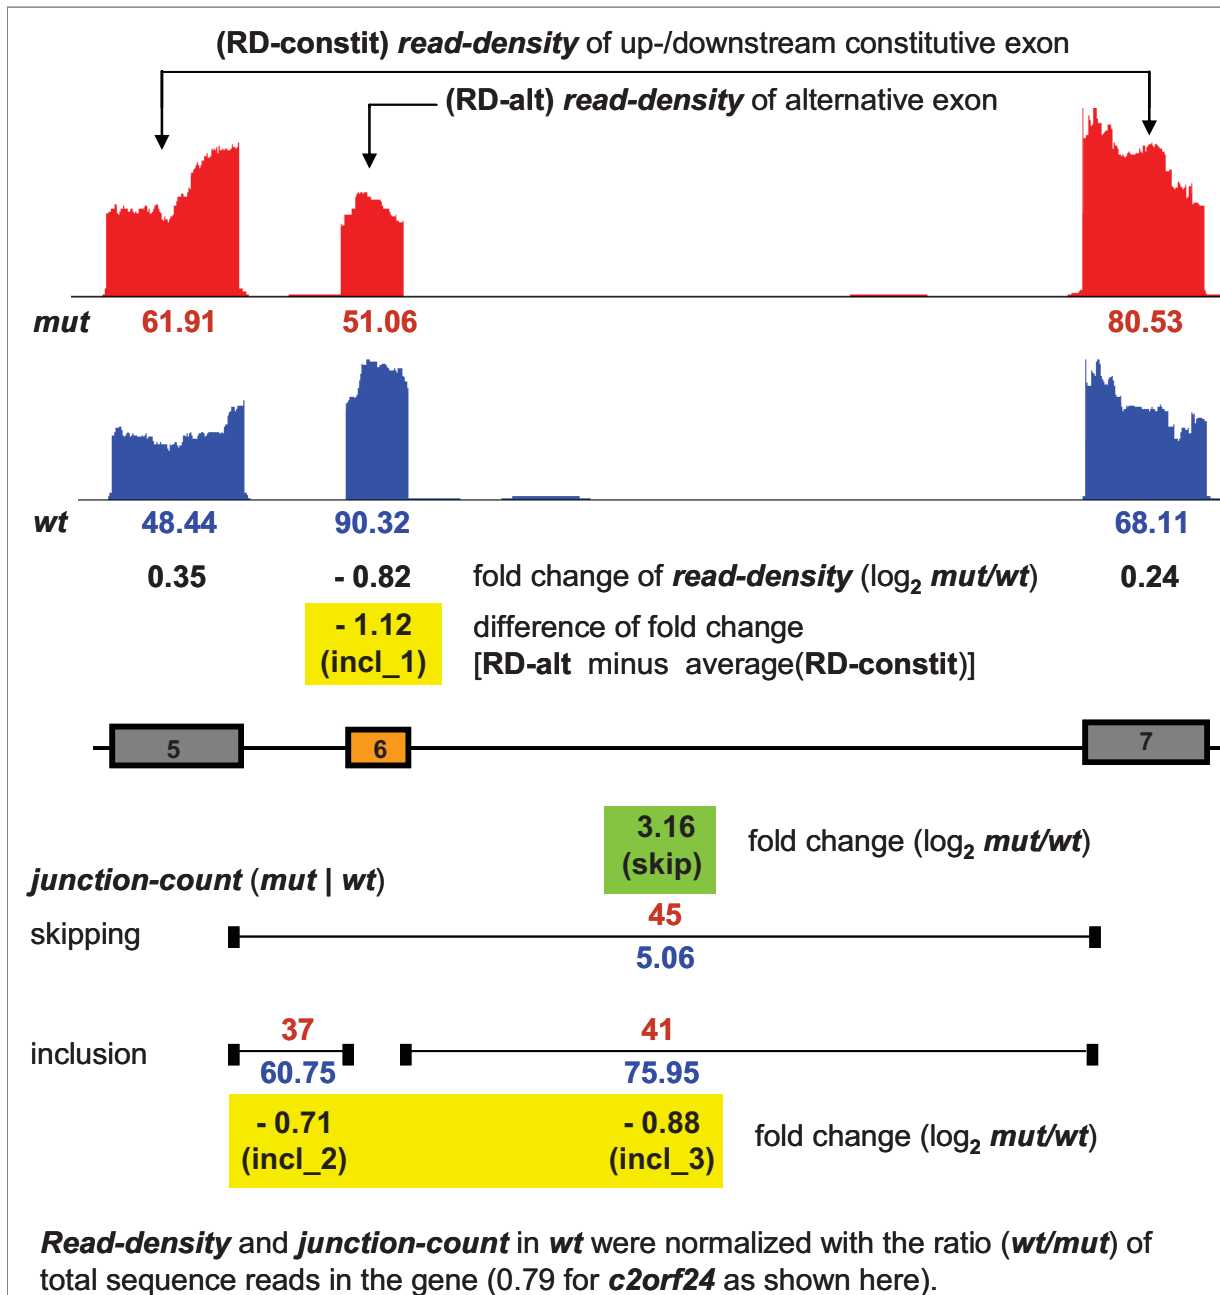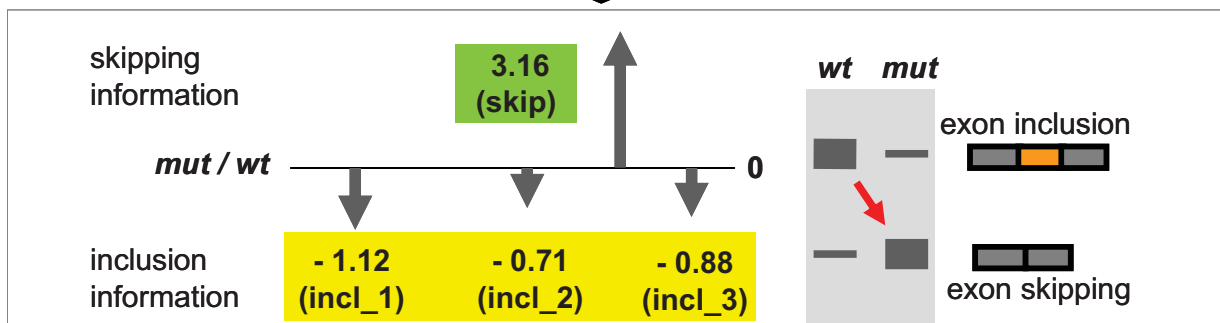

Figure 4. Multiple-exon skipping

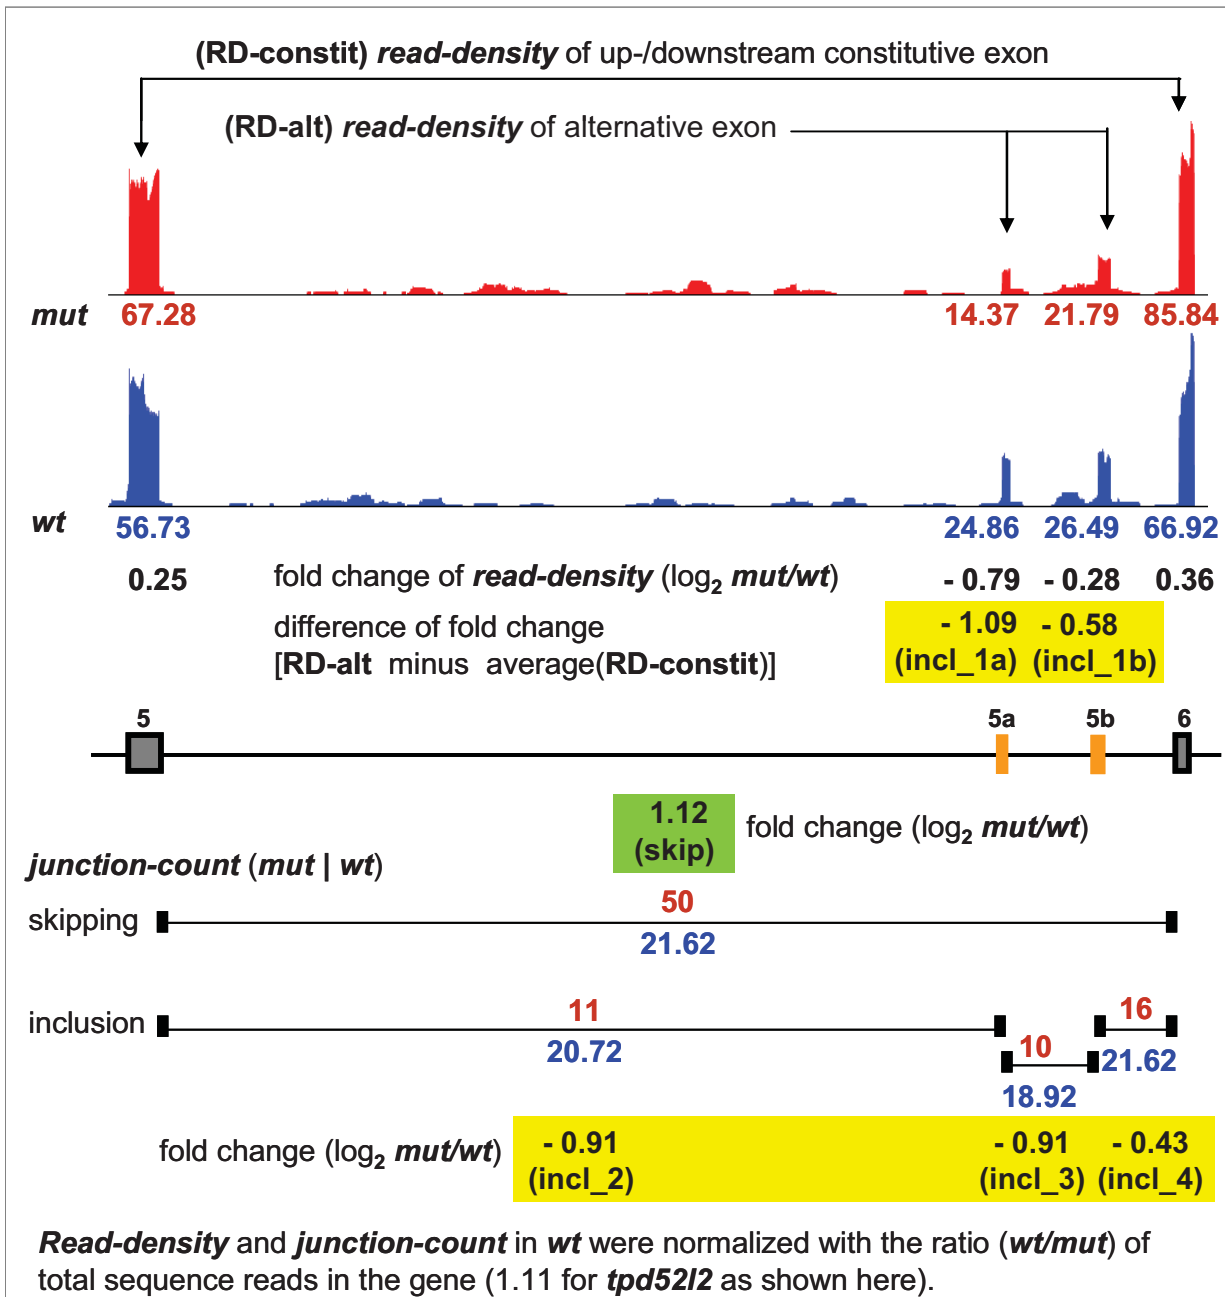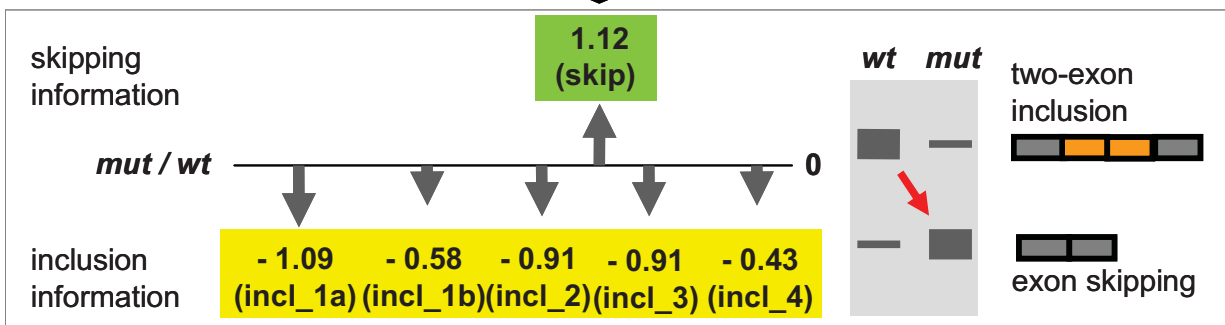

**Figure 5. Intron retention**

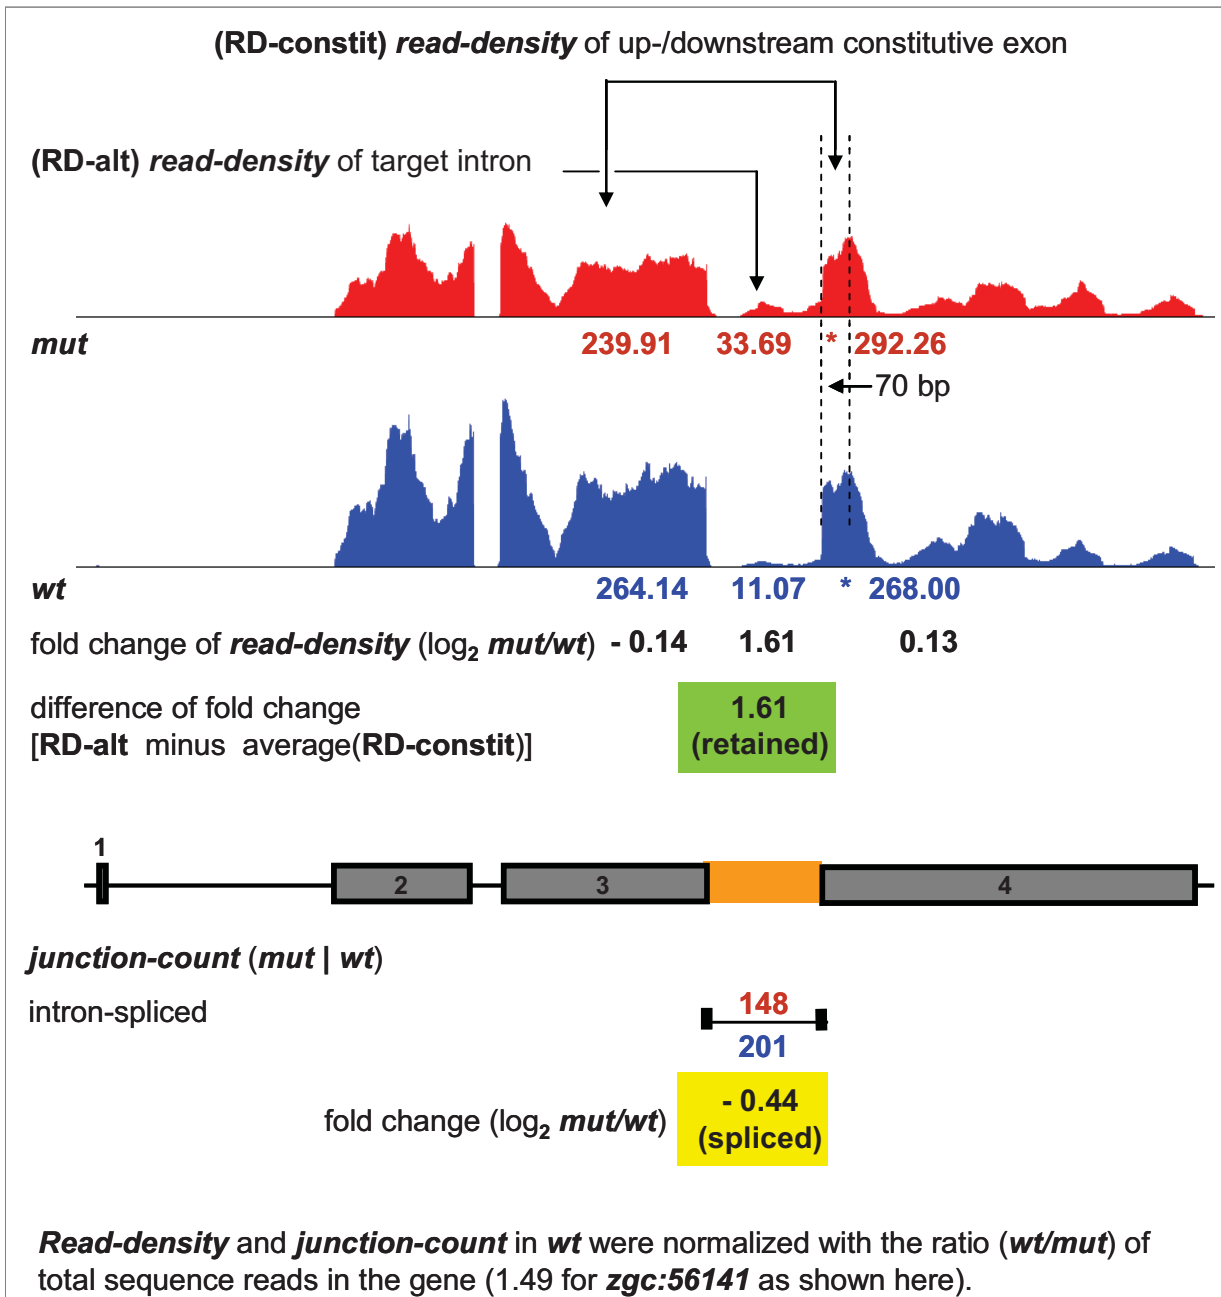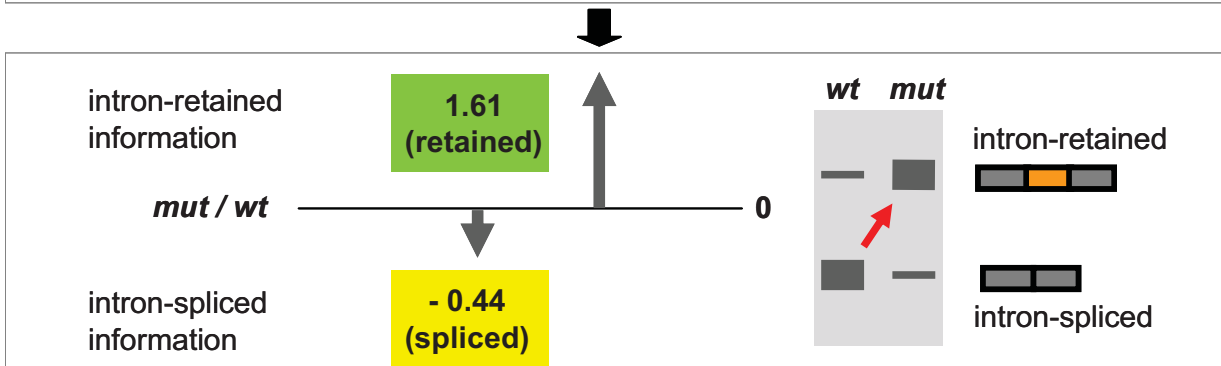

Figure 6. Alternative 5' and 3' splice sites

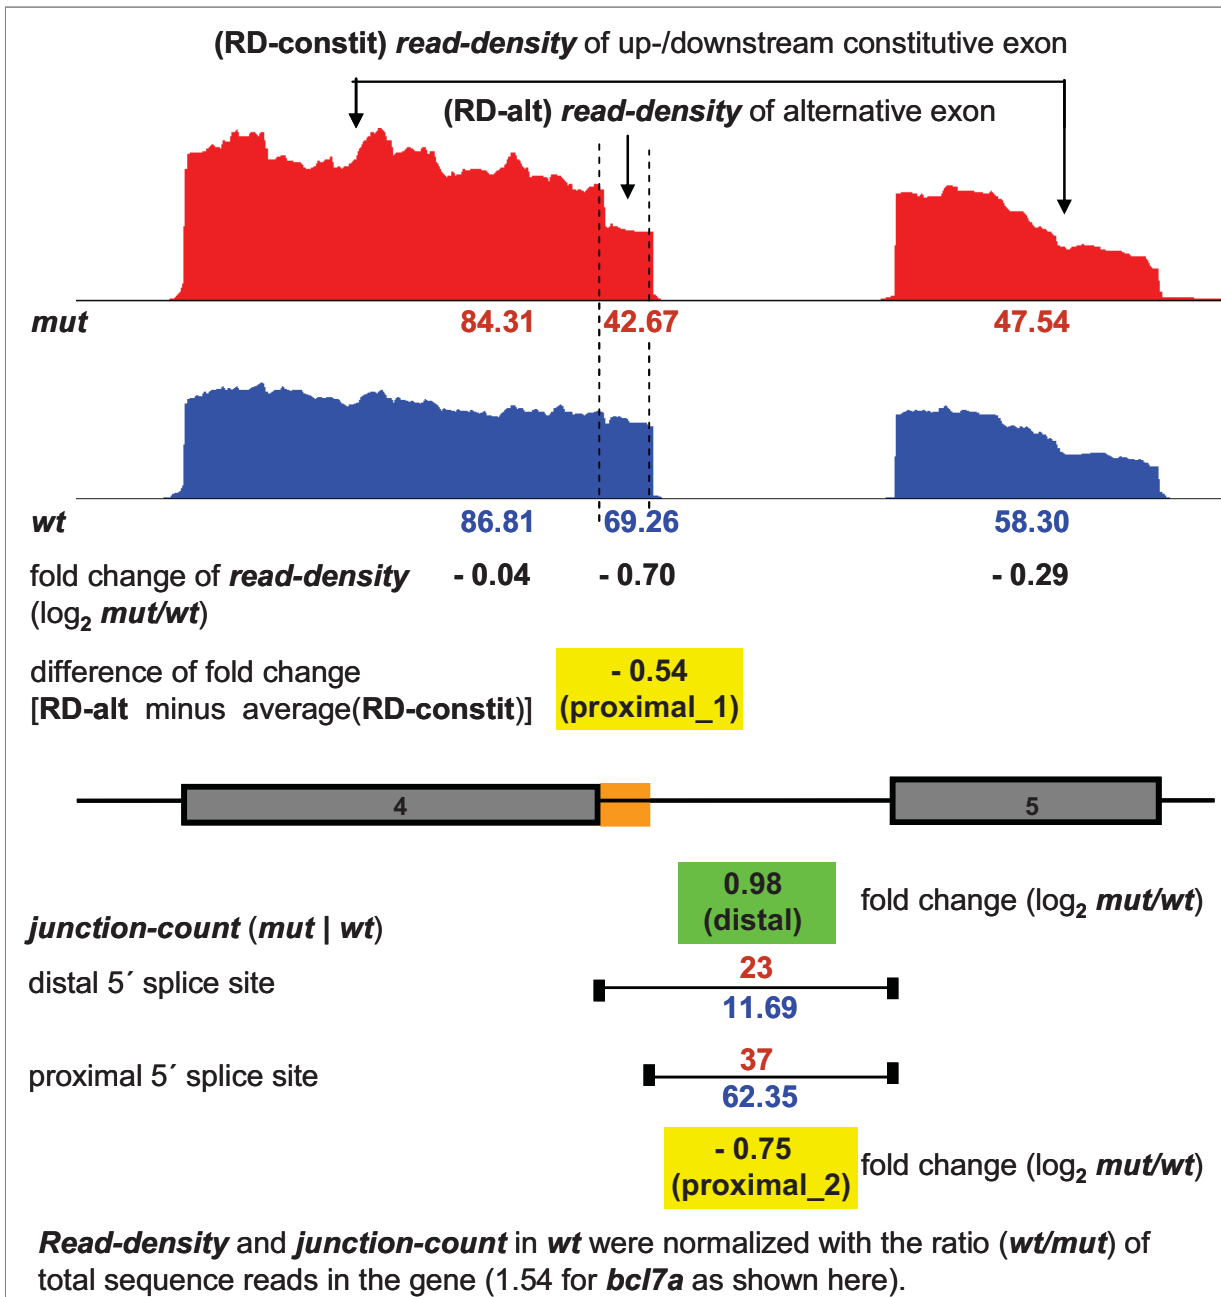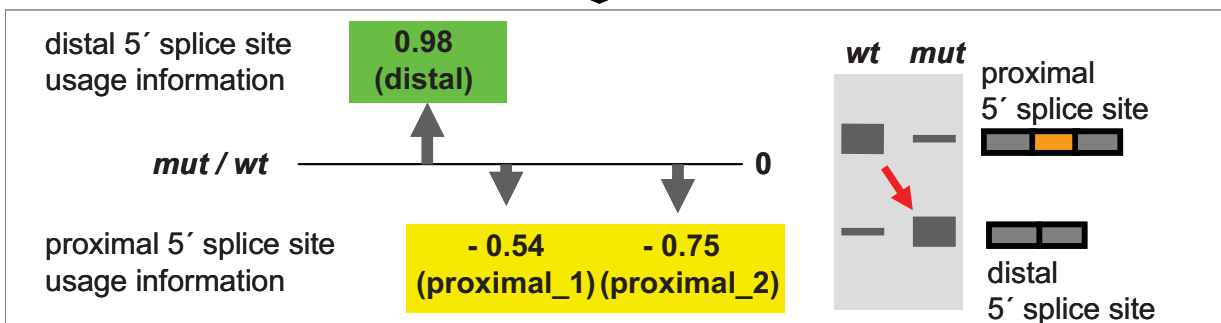



Figure 7. Mutually exclusive exon

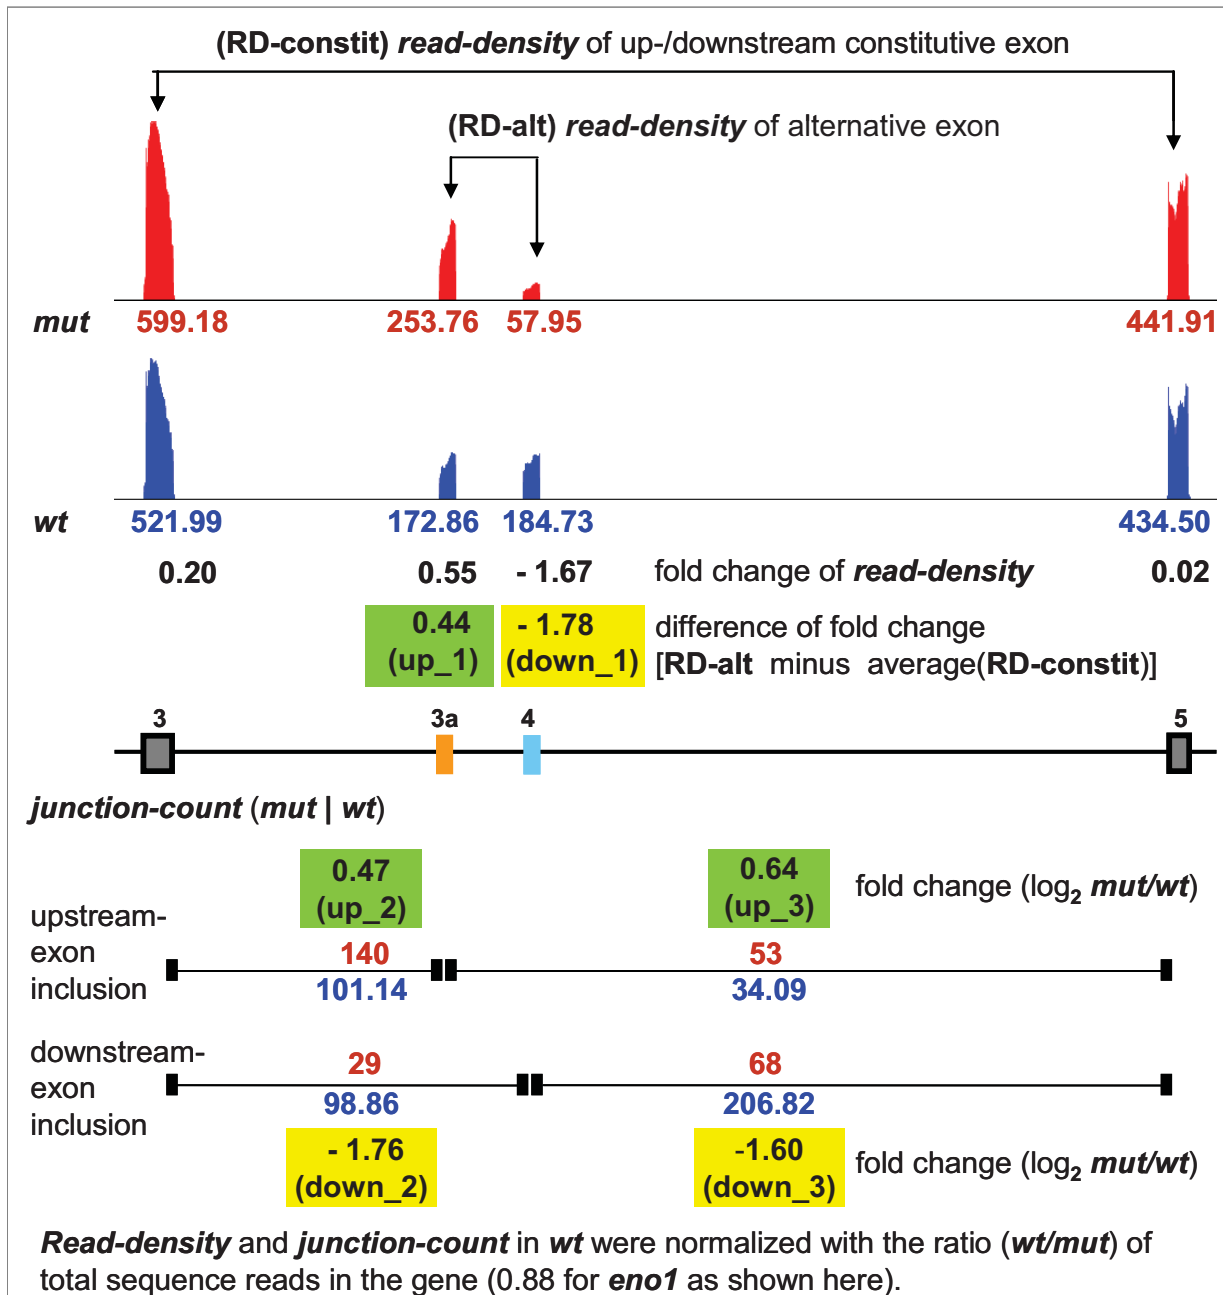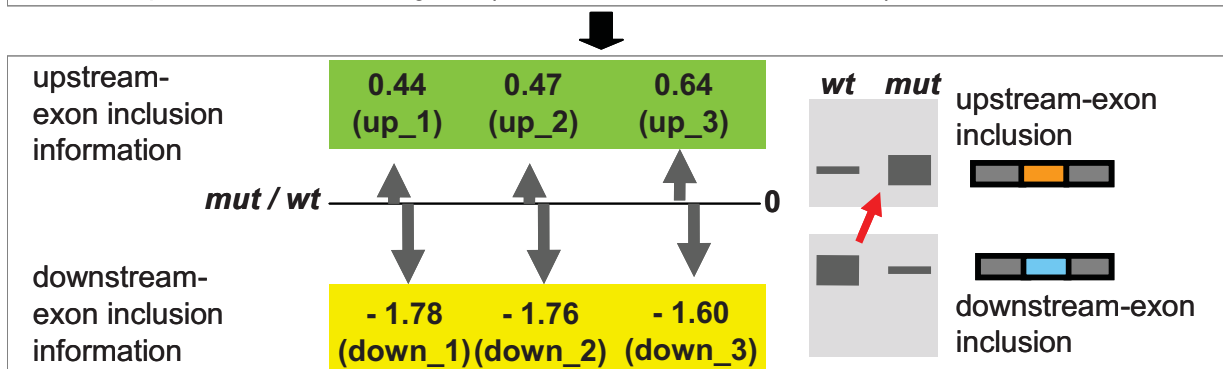

## 5. Sequence motif analysis of single-exon skipping targets

To search for significant sequence features in the U1C-dependent alternative splicing targets, we concentrated on the 5' splice sites of the 218 predicted single-exon skipping targets. We selected the target exons and their corresponding upstream exons with a GU at 5' splice site positions +1/+2, and a downstream intron of at least 135 bp. As background control we used all exons except for the first and last ones of the expressed refSeq mRNAs, which have a GU at their 5' splice sites and a minimal intron length of 135 bp. Each of these three datasets

- **target-exon** (176),
- **upstream-exon** (176),
- **background-exon** (46,713),

was analyzed for these three sequence features:

- 1) **5' splice site** (11 nucleotides; positions -3 to +8),
- 2) **downstream-intron** (positions +7 to +100), and
- 3) **exon**.

First, we looked at the **5' splice site** quality, based on the HBond Score Concept (<http://www.uni-duesseldorf.de/rna/html/background.php>), which considers the 11-nt of the 5' splice site sequence for score calculation. Comparing the **target-exon** to the **upstream-exon**, no significant difference in score distribution was observed, neither could we detect any correlation between the two datasets (data not shown).

Second, we looked at the **downstream-intron** sequences: In all three datasets, T and A nucleotides represent ~ 65% of these sequences. However, there was a slight increase of T and a decrease of A nucleotides in the **target-exon** dataset. The table below summarizes the nucleotide distributions in each dataset.

| dataset                                     | A     | C     | G     | T     |
|---------------------------------------------|-------|-------|-------|-------|
| <b>downstream-intron of target-exon</b>     | 27.83 | 18.31 | 16.28 | 37.58 |
| <b>downstream-intron of upstream-exon</b>   | 28.61 | 18.25 | 17.91 | 35.23 |
| <b>downstream-intron of background-exon</b> | 30.69 | 17.76 | 16.56 | 34.99 |

In addition, the frequency of 4-nt and 6-nt motifs in the **downstream-intron** sequences was calculated, as well as its differences between the three datasets. The most significant difference was that the T<sub>4</sub>- and T<sub>6</sub> motifs occurred at a higher frequency in the **target-exon** dataset. **Figure 8** (upper panel) shows the ten most significant 6-nt motifs that occur at a higher frequency in target-exon versus upstream-exon and background-exon datasets (> 0.995 quantile). Furthermore, we applied the Motif-based sequence analysis tools MEME ([http://meme.nbcr.net/meme4\\_4\\_0/intro.html](http://meme.nbcr.net/meme4_4_0/intro.html), Baily *et al.*, 1994) to look for significant motifs in the **downstream intron** sequences of the **target-exon** and **upstream-exon**. Here we used the following parameters to search the high-score motifs in 12-nt windows:

- a) zero or one occurrence per sequence (zoops),
- b) 158 (90% of total 176) sites (nsites).

Based on the motif with the highest information content obtained (**Figure 8**, lower panel), we conclude that T-stretches are enriched in the introns downstream of **target-exons**.

Third, the same approach was applied to the **exon** sequences of the **target-exon** and **upstream-exon** datasets to search for high-score motifs in 6- or 8-nt windows. As a result, no significantly enriched motif was found (data not shown).

**Figure 8. Sequence motif analysis of U1C dependent exon**

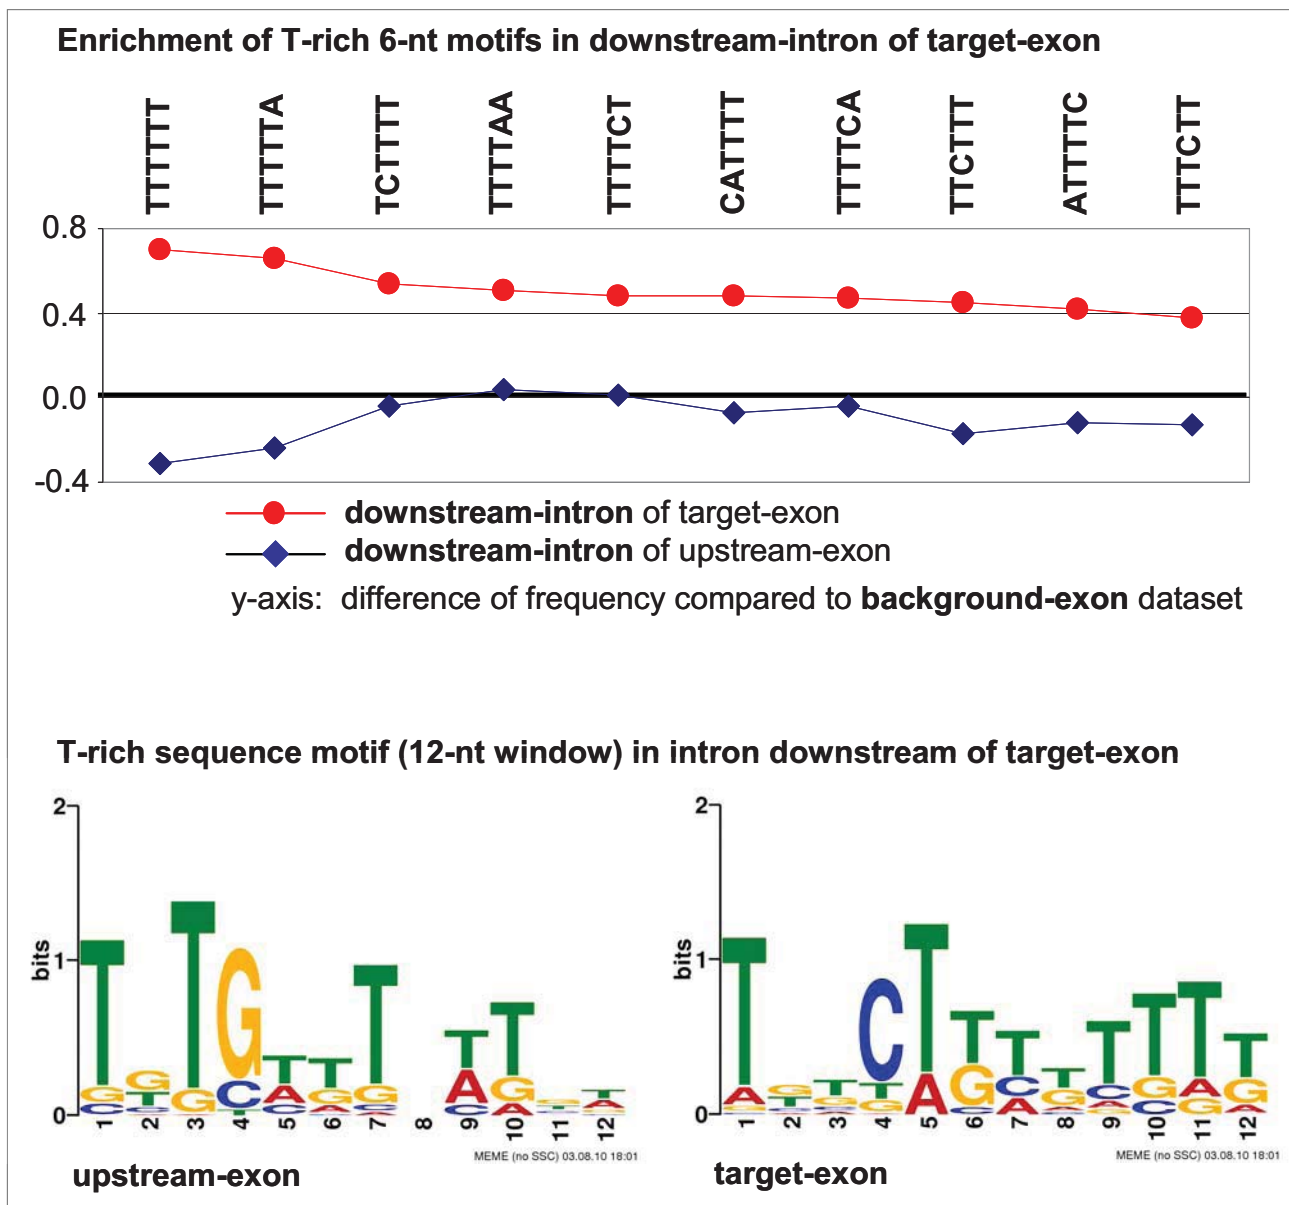

## 6. References

- Bailey TL, Elkan C. 1994. Fitting a mixture model by expectation maximization to discover motifs in biopolymers. *Proc Int Conf Intell Syst Mol Biol.* **2**: 28-36.
- Benjamini Y, Hochberg Y. 1995. Controlling the false discovery rate: a practical and powerful approach to multiple testing. *Journal of the Royal Statistical Society: Series B*, **57**: 289–300.
- De Bona F, Ossowski S, Schneeberger K, Rättsch G. 2008. Optimal spliced alignments of short sequence reads. *Bioinformatics* **24**: i174-i180.
- Jean G, Kahles A, Sreedharan VT, De Bona F, Rättsch G. 2010. RNA-seq Read Alignments with PALMapper. *Current Protocols in Bioinformatics*, in press.
- Li H and Durbin R. 2009. Fast and accurate short read alignment with Burrows-Wheeler Transform. *Bioinformatics* **25**: 1754-60.
- Schneeberger K, Hagmann J, Ossowski S, Warthmann N, Gesing S, Kohlbacher O, Weigel D. 2009. Simultaneous alignment of short reads against multiple genomes. *Genome Biol.* **10**: R98.
- Sonnenburg S, Schweikert G, Philips P, Behr J, Rättsch G. 2007. Accurate splice site prediction using support vector machines. *BMC Bioinformatics* **8(Suppl 10)**: S7.

**Supplementary Table S1. List of down-regulated genes**

| gene_id          | refSeq_mRNA  | fc(log <sub>2</sub> <i>mut/wt</i> ) | p-value   | FDR       |
|------------------|--------------|-------------------------------------|-----------|-----------|
| rho              | NM_131084    | -5.44                               | 3.83E-127 | 6.56E-124 |
| zgc:165530       | NM_001098730 | -1.13                               | 6.27E-098 | 7.66E-095 |
| fabp7a           | NM_131605    | -1.78                               | 8.93E-084 | 7.64E-081 |
| zgc:136930       | NM_001039819 | -2.61                               | 5.49E-080 | 4.27E-077 |
| opn1sw1          | NM_131319    | -8.01                               | 1.43E-079 | 1.02E-076 |
| ckb              | NM_173222    | -1.52                               | 5.31E-078 | 3.50E-075 |
| opn1lw2          | NM_001002443 | -6.76                               | 5.37E-070 | 3.28E-067 |
| si:dkeyp-113d7.4 | NM_001114342 | -0.78                               | 2.83E-060 | 1.43E-057 |
| zgc:112134       | NM_001017738 | -0.92                               | 8.87E-060 | 4.22E-057 |
| tubb5            | NM_198818    | -1.75                               | 1.60E-058 | 7.19E-056 |
| zgc:92692        | NM_001002408 | -0.84                               | 3.00E-053 | 1.28E-050 |
| zgc:110021       | NM_001024427 | -0.85                               | 8.37E-045 | 3.11E-042 |
| crygn2           | NM_001003428 | -0.97                               | 1.34E-043 | 4.79E-041 |
| h3f3c            | NM_200003    | -1.19                               | 2.40E-043 | 8.23E-041 |
| arr3l            | NM_001002405 | -4.83                               | 4.24E-043 | 1.40E-040 |
| zgc:123194       | NM_001037410 | -0.84                               | 2.63E-042 | 8.35E-040 |
| cryba4           | NM_001018125 | -0.83                               | 3.98E-039 | 1.17E-036 |
| hmgb3a           | NM_001122836 | -1.22                               | 4.70E-039 | 1.34E-036 |
| cirbp            | NM_001040321 | -0.82                               | 9.27E-037 | 2.33E-034 |
| cryba1b          | NM_001002586 | -0.66                               | 1.00E-033 | 2.32E-031 |
| zgc:86723        | NM_001002142 | -1.15                               | 1.61E-031 | 3.44E-029 |
| ppial            | NM_199957    | -0.81                               | 3.71E-031 | 7.74E-029 |
| tmsb             | NM_205581    | -1.92                               | 5.01E-031 | 1.02E-028 |
| zgc:171793       | NM_001109858 | -2.54                               | 1.34E-030 | 2.60E-028 |
| MGC171407        | NM_001105126 | -1.36                               | 2.23E-030 | 4.25E-028 |
| krt5             | NM_131156    | -0.65                               | 4.32E-029 | 8.04E-027 |
| opn1mw1          | NM_131253    | -9.23                               | 4.04E-028 | 7.35E-026 |
| zgc:171773       | NM_001100437 | -0.67                               | 4.39E-028 | 7.82E-026 |
| zgc:56085        | NM_199816    | -4.82                               | 9.24E-027 | 1.55E-024 |
| ptma             | NM_194376    | -1.01                               | 1.60E-026 | 2.63E-024 |
| opn1sw2          | NM_131192    | -5.96                               | 3.06E-026 | 4.94E-024 |
| cryba2b          | NM_001002584 | -0.71                               | 2.63E-025 | 4.02E-023 |
| rs1              | NM_001003438 | -4.02                               | 3.38E-025 | 5.08E-023 |
| neurod           | NM_130978    | -2.34                               | 4.56E-024 | 6.62E-022 |
| mdkb             | NM_131716    | -1.48                               | 4.40E-023 | 6.07E-021 |
| zgc:165618       | NM_001099251 | -1.19                               | 6.42E-023 | 8.72E-021 |
| slc1a2           | NM_199979    | -1.39                               | 7.02E-023 | 9.39E-021 |
| crx              | NM_152940    | -2.55                               | 1.27E-022 | 1.67E-020 |
| calm2b           | NM_214736    | -0.74                               | 4.93E-021 | 5.94E-019 |
| zgc:158409       | NM_001080033 | -1.06                               | 6.85E-021 | 8.14E-019 |
| zgc:92355        | NM_001007311 | -1.91                               | 7.59E-021 | 8.90E-019 |
| zgc:136220       | NM_001033722 | -3.39                               | 2.41E-020 | 2.79E-018 |
| zgc:92724        | NM_001002582 | -1.27                               | 1.61E-019 | 1.76E-017 |
| gfap             | NM_131373    | -1.79                               | 5.29E-019 | 5.52E-017 |
| h3f3a            | NM_212996    | -0.69                               | 8.45E-019 | 8.71E-017 |
| gnb3             | NM_213202    | -6.81                               | 1.82E-018 | 1.85E-016 |
| gpm6aa           | NM_213200    | -1.24                               | 2.97E-018 | 2.95E-016 |
| zgc:85717        | NM_213223    | -0.74                               | 7.72E-018 | 7.51E-016 |
| rbp4             | NM_130920    | -0.85                               | 1.05E-017 | 1.01E-015 |

## Down-regulated genes

| gene_id    | refSeq_mRNA  | fc(log <sub>2</sub> <i>mut/wt</i> ) | p-value   | FDR       |
|------------|--------------|-------------------------------------|-----------|-----------|
| col1a2     | NM_182968    | -0.86                               | 1.22E-017 | 1.16E-015 |
| gnat2      | NM_131869    | -5.25                               | 1.59E-017 | 1.50E-015 |
| rcv1       | NM_199964    | -4.38                               | 2.64E-017 | 2.43E-015 |
| crygmx     | NM_001013262 | -1.14                               | 3.67E-017 | 3.34E-015 |
| marcks     | NM_001015060 | -1.02                               | 4.90E-017 | 4.41E-015 |
| rpl5a      | NM_199756    | -0.48                               | 1.32E-016 | 1.18E-014 |
| zgc:165347 | NM_001099243 | -0.90                               | 5.25E-016 | 4.49E-014 |
| hmgb2      | NM_001004674 | -0.62                               | 9.74E-016 | 8.17E-014 |
| elavl3     | NM_131449    | -1.05                               | 1.37E-015 | 1.14E-013 |
| anp32e     | NM_213277    | -1.28                               | 2.55E-015 | 2.06E-013 |
| snap25b    | NM_131434    | -1.72                               | 3.60E-015 | 2.85E-013 |
| tyrp1b     | NM_001002749 | -1.09                               | 1.19E-014 | 9.18E-013 |
| dpysl2     | NM_001020517 | -1.54                               | 1.22E-014 | 9.34E-013 |
| zgc:86896  | NM_001002100 | -1.40                               | 1.49E-014 | 1.13E-012 |
| zgc:77366  | NM_212645    | -1.21                               | 1.86E-014 | 1.39E-012 |
| cryba2a    | NM_001002049 | -0.56                               | 3.36E-014 | 2.50E-012 |
| tubb2c     | NM_198809    | -0.48                               | 4.64E-014 | 3.39E-012 |
| zgc:175106 | NM_001111190 | -1.96                               | 9.21E-014 | 6.62E-012 |
| zgc:56418  | NM_201101    | -0.50                               | 1.32E-013 | 9.33E-012 |
| atp1a3a    | NM_131684    | -1.17                               | 2.24E-013 | 1.56E-011 |
| zgc:114180 | NM_001030248 | -3.94                               | 4.85E-013 | 3.30E-011 |
| rps12      | NM_200046    | -0.28                               | 8.96E-013 | 6.04E-011 |
| calb2      | NM_200711    | -1.82                               | 2.05E-012 | 1.34E-010 |
| sox4a      | NM_213122    | -1.12                               | 2.50E-012 | 1.62E-010 |
| eef1g      | NM_173263    | -0.39                               | 2.73E-012 | 1.74E-010 |
| stmn2      | NM_001024222 | -1.23                               | 2.77E-012 | 1.76E-010 |
| zgc:153208 | NM_001045853 | -1.73                               | 2.91E-012 | 1.83E-010 |
| zgc:173645 | NM_001102644 | -1.04                               | 3.10E-012 | 1.93E-010 |
| khdrbs1    | NM_130925    | -0.54                               | 3.17E-012 | 1.97E-010 |
| vsx1       | NM_131333    | -2.09                               | 3.24E-012 | 1.99E-010 |
| cd99l2     | NM_194369    | -1.08                               | 1.21E-011 | 7.12E-010 |
| zgc:109988 | NM_001020546 | -2.53                               | 1.39E-011 | 8.11E-010 |
| zgc:103639 | NM_001004668 | -0.30                               | 1.45E-011 | 8.38E-010 |
| elovl4     | NM_199972    | -4.15                               | 3.08E-011 | 1.72E-009 |
| zgc:171791 | NM_001100442 | -1.23                               | 3.40E-011 | 1.89E-009 |
| hnrnpa0    | NM_214706    | -0.62                               | 5.06E-011 | 2.78E-009 |
| ywhah      | NM_213164    | -0.99                               | 6.12E-011 | 3.34E-009 |
| zgc:101846 | NM_001005967 | -0.70                               | 6.64E-011 | 3.60E-009 |
| eef2l      | NM_200458    | -0.25                               | 7.93E-011 | 4.24E-009 |
| zgc:158829 | NM_001080602 | -1.48                               | 7.89E-011 | 4.24E-009 |
| dpysl3     | NM_001020512 | -1.43                               | 1.12E-010 | 5.89E-009 |
| vamp2      | NM_200005    | -1.24                               | 1.52E-010 | 7.99E-009 |
| matn1      | NM_001099740 | -1.75                               | 2.26E-010 | 1.18E-008 |
| gng3       | NM_131841    | -1.13                               | 2.91E-010 | 1.49E-008 |
| zgc:171792 | NM_001102394 | -1.48                               | 3.03E-010 | 1.54E-008 |
| fabp11b    | NM_001020558 | -1.90                               | 3.80E-010 | 1.91E-008 |
| hapln1a    | NM_001007790 | -1.25                               | 4.25E-010 | 2.10E-008 |
| kera       | NM_001025548 | -1.94                               | 6.68E-010 | 3.26E-008 |
| gpm6ab     | NM_214687    | -1.12                               | 6.73E-010 | 3.27E-008 |

## Down-regulated genes

| gene_id         | refSeq_mRNA  | fc(log <sub>2</sub> <i>mut/wt</i> ) | p-value   | FDR       |
|-----------------|--------------|-------------------------------------|-----------|-----------|
| zgc:92241       | NM_001003422 | -1.00                               | 1.04E-009 | 4.96E-008 |
| zgc:103663      | NM_001007362 | -1.49                               | 1.30E-009 | 6.13E-008 |
| col1a3          | NM_201478    | -0.58                               | 1.75E-009 | 8.07E-008 |
| cfl1            | NM_213639    | -0.74                               | 2.41E-009 | 1.11E-007 |
| neurod4         | NM_170762    | -1.70                               | 2.44E-009 | 1.11E-007 |
| gngt1           | NM_199967    | -3.51                               | 3.02E-009 | 1.37E-007 |
| actc1           | NM_214784    | -0.16                               | 3.62E-009 | 1.63E-007 |
| pbx3b           | NM_001098243 | -1.24                               | 3.88E-009 | 1.74E-007 |
| snrpc           | NM_173251    | -2.37                               | 4.47E-009 | 1.96E-007 |
| tnrc4           | NM_131494    | -1.34                               | 6.48E-009 | 2.79E-007 |
| lim2.4          | NM_001002407 | -0.89                               | 6.83E-009 | 2.92E-007 |
| isl1            | NM_130962    | -1.63                               | 7.12E-009 | 3.03E-007 |
| hnrpa1          | NM_200104    | -0.69                               | 8.62E-009 | 3.63E-007 |
| zgc:85677       | NM_213168    | -0.32                               | 1.01E-008 | 4.22E-007 |
| tuba2           | NM_213030    | -1.12                               | 1.01E-008 | 4.23E-007 |
| mab2111         | NM_152974    | -1.33                               | 1.34E-008 | 5.52E-007 |
| zgc:55429       | NM_201099    | -0.78                               | 1.50E-008 | 6.12E-007 |
| gapdhs          | NM_213094    | -0.45                               | 1.54E-008 | 6.21E-007 |
| zgc:109965      | NM_001033747 | -3.12                               | 1.71E-008 | 6.82E-007 |
| zgc:63849       | NM_199642    | -1.00                               | 1.92E-008 | 7.65E-007 |
| zgc:153426      | NM_001076715 | -1.18                               | 2.09E-008 | 8.27E-007 |
| sparc           | NM_001001942 | -0.49                               | 2.19E-008 | 8.65E-007 |
| atp1b2a         | NM_131669    | -0.85                               | 2.33E-008 | 9.13E-007 |
| zgc:73153       | NM_200828    | -1.84                               | 2.71E-008 | 1.06E-006 |
| stxbp1          | NM_001025182 | -0.87                               | 2.76E-008 | 1.07E-006 |
| otx5            | NM_181331    | -1.83                               | 2.92E-008 | 1.13E-006 |
| zgc:162825      | NM_001089526 | -1.22                               | 2.95E-008 | 1.14E-006 |
| rps24           | NM_001012316 | -0.23                               | 2.99E-008 | 1.15E-006 |
| gap43           | NM_131341    | -0.87                               | 3.00E-008 | 1.15E-006 |
| sag             | NM_001033749 | -3.73                               | 3.61E-008 | 1.36E-006 |
| tcf7l2          | NM_131259    | -1.28                               | 3.83E-008 | 1.44E-006 |
| tfap2a          | NM_176859    | -1.23                               | 4.87E-008 | 1.82E-006 |
| meis2.2         | NM_131896    | -0.91                               | 5.54E-008 | 2.05E-006 |
| tnw             | NM_131036    | -0.98                               | 5.82E-008 | 2.13E-006 |
| atp1a1b         | NM_131690    | -1.39                               | 7.57E-008 | 2.74E-006 |
| zgc:92890       | NM_001002469 | -1.28                               | 7.83E-008 | 2.83E-006 |
| otx2            | NM_131251    | -1.59                               | 8.31E-008 | 2.97E-006 |
| col1a1          | NM_199214    | -0.39                               | 9.85E-008 | 3.48E-006 |
| mb              | NM_200586    | -1.64                               | 1.05E-007 | 3.70E-006 |
| fam49a          | NM_001003606 | -1.77                               | 1.14E-007 | 3.97E-006 |
| a2bp1           | NM_001005596 | -1.18                               | 1.15E-007 | 3.99E-006 |
| si:rp71-10d23.3 | NM_001089376 | -2.66                               | 1.21E-007 | 4.20E-006 |
| pax6a           | NM_131304    | -1.60                               | 1.43E-007 | 4.86E-006 |
| gdi1            | NM_001020608 | -1.09                               | 1.63E-007 | 5.50E-006 |
| zgc:109984      | NM_001029963 | -1.40                               | 2.04E-007 | 6.80E-006 |
| zgc:110292      | NM_001017599 | -0.69                               | 2.24E-007 | 7.46E-006 |
| tfap2b          | NM_001017847 | -1.85                               | 2.27E-007 | 7.52E-006 |
| gnb3l           | NM_001002437 | -2.41                               | 2.37E-007 | 7.82E-006 |
| prox1           | NM_131405    | -1.93                               | 2.55E-007 | 8.40E-006 |

## Down-regulated genes

| gene_id         | refSeq_mRNA  | fc(log <sub>2</sub> <i>mut/wt</i> ) | p-value   | FDR       |
|-----------------|--------------|-------------------------------------|-----------|-----------|
| mfap2           | NM_001039357 | -1.22                               | 2.67E-007 | 8.71E-006 |
| mip2            | NM_001020520 | -1.16                               | 2.68E-007 | 8.72E-006 |
| rplp2l          | NM_001100436 | -0.19                               | 3.72E-007 | 1.19E-005 |
| rtn1a           | NM_001029967 | -0.89                               | 3.82E-007 | 1.21E-005 |
| elavl4          | NM_131453    | -0.84                               | 3.93E-007 | 1.24E-005 |
| pou4f2          | NM_212807    | -1.90                               | 4.09E-007 | 1.29E-005 |
| zgc:194937      | NM_001130624 | -1.13                               | 4.37E-007 | 1.37E-005 |
| syt1            | NM_001002463 | -1.26                               | 4.40E-007 | 1.38E-005 |
| syncrip         | NM_214696    | -0.71                               | 5.79E-007 | 1.79E-005 |
| lmo3            | NM_001020739 | -1.56                               | 6.40E-007 | 1.97E-005 |
| crabp1a         | NM_182858    | -1.87                               | 6.54E-007 | 2.01E-005 |
| LOC795575       | NM_001123311 | -1.93                               | 6.92E-007 | 2.11E-005 |
| zgc:111964      | NM_001030133 | -2.69                               | 7.84E-007 | 2.38E-005 |
| h2afvl          | NM_001043323 | -0.33                               | 9.67E-007 | 2.89E-005 |
| atoh2b          | NM_131817    | -1.93                               | 1.11E-006 | 3.30E-005 |
| lim2.3          | NM_001002587 | -1.41                               | 1.37E-006 | 4.05E-005 |
| ndrg4           | NM_001045173 | -1.28                               | 1.44E-006 | 4.22E-005 |
| zgc:73075       | NM_200825    | -3.72                               | 1.62E-006 | 4.73E-005 |
| zgc:110025      | NM_001020557 | -4.03                               | 1.62E-006 | 4.73E-005 |
| rlbp1a          | NM_200705    | -2.51                               | 1.64E-006 | 4.75E-005 |
| gnao1           | NM_200787    | -0.99                               | 1.75E-006 | 5.05E-005 |
| zgc:86661       | NM_001002059 | -1.69                               | 1.77E-006 | 5.11E-005 |
| bhlhb5          | NM_200955    | -1.92                               | 1.88E-006 | 5.40E-005 |
| sfpq            | NM_213278    | -0.73                               | 2.13E-006 | 6.06E-005 |
| sox11b          | NM_131337    | -0.88                               | 2.32E-006 | 6.59E-005 |
| rps4x           | NM_001005589 | -0.17                               | 2.76E-006 | 7.77E-005 |
| crmp1           | NM_001020725 | -1.87                               | 2.82E-006 | 7.92E-005 |
| rpepa           | NM_200751    | -1.53                               | 2.88E-006 | 8.05E-005 |
| fez1            | NM_213396    | -1.00                               | 2.95E-006 | 8.23E-005 |
| guk1            | NM_200724    | -5.21                               | 2.98E-006 | 8.25E-005 |
| syntaxin1b      | NM_131523    | -0.79                               | 2.97E-006 | 8.25E-005 |
| cugbp2          | NM_194401    | -1.08                               | 3.10E-006 | 8.54E-005 |
| zgc:153593      | NM_001076582 | -2.41                               | 3.12E-006 | 8.56E-005 |
| zgc:109973      | NM_001020540 | -0.75                               | 3.71E-006 | 0.000101  |
| si:dkey-76p14.4 | NM_001030278 | -1.68                               | 4.19E-006 | 0.000113  |
| zgc:114051      | NM_001025502 | -0.76                               | 4.20E-006 | 0.000113  |
| rrm2            | NM_131450    | -0.92                               | 4.33E-006 | 0.000117  |
| zgc:86878       | NM_001004601 | -0.81                               | 4.71E-006 | 0.000125  |
| klf11a          | NM_001044941 | -2.37                               | 5.30E-006 | 0.000141  |
| cry2a           | NM_131791    | -0.99                               | 5.37E-006 | 0.000142  |
| nr2f1a          | NM_131180    | -1.10                               | 5.60E-006 | 0.000147  |
| islr2           | NM_001013523 | -0.87                               | 5.66E-006 | 0.000149  |
| zgc:123215      | NM_001037424 | -0.36                               | 5.71E-006 | 0.000149  |
| zgc:158291      | NM_001080058 | -1.73                               | 6.46E-006 | 0.000167  |
| defbl1          | NM_001081553 | -1.33                               | 6.57E-006 | 0.000170  |
| lhx9            | NM_001017710 | -1.39                               | 6.90E-006 | 0.000177  |
| zgc:113456      | NM_001030072 | -1.21                               | 6.97E-006 | 0.000179  |
| hdac1           | NM_173236    | -0.56                               | 7.02E-006 | 0.000179  |
| mab21l2         | NM_152975    | -0.88                               | 7.16E-006 | 0.000182  |



## Down-regulated genes

| gene_id          | refSeq_mRNA  | fc(log <sub>2</sub> <i>mut/wt</i> ) | p-value   | FDR      |
|------------------|--------------|-------------------------------------|-----------|----------|
| zgc:73310        | NM_200785    | -5.45                               | 7.63E-006 | 0.000193 |
| dpysl5a          | NM_001018149 | -1.28                               | 8.00E-006 | 0.000202 |
| nsf              | NM_001044328 | -1.05                               | 8.29E-006 | 0.000208 |
| zgc:92631        | NM_001002695 | -0.94                               | 8.46E-006 | 0.000212 |
| silvb            | NM_001033918 | -1.17                               | 9.80E-006 | 0.000243 |
| ctbp2            | NM_131715    | -1.42                               | 1.01E-005 | 0.000249 |
| rbp2a            | NM_153004    | -1.81                               | 1.01E-005 | 0.000249 |
| rpl34            | NM_201122    | -0.18                               | 1.01E-005 | 0.000249 |
| barhl2           | NM_205740    | -1.84                               | 1.11E-005 | 0.000270 |
| krt15            | NM_213523    | -1.06                               | 1.18E-005 | 0.000287 |
| zgc:101859       | NM_001005965 | -2.60                               | 1.29E-005 | 0.000311 |
| mpp6             | NM_001044777 | -1.60                               | 1.30E-005 | 0.000312 |
| zgc:153632       | NM_001076560 | -0.71                               | 1.38E-005 | 0.000329 |
| calb2l           | NM_200718    | -1.21                               | 1.39E-005 | 0.000330 |
| pde6g            | NM_212799    | -1.89                               | 1.40E-005 | 0.000332 |
| dmbx1a           | NM_152977    | -2.03                               | 1.47E-005 | 0.000346 |
| zgc:77708        | NM_205554    | -0.84                               | 1.47E-005 | 0.000346 |
| sept5b           | NM_001003782 | -1.55                               | 1.48E-005 | 0.000348 |
| zgc:153686       | NM_001077804 | -0.35                               | 1.51E-005 | 0.000354 |
| rorb             | NM_001082856 | -1.74                               | 1.57E-005 | 0.000366 |
| tmem59l          | NM_213337    | -1.05                               | 1.61E-005 | 0.000375 |
| si:ch211-237l4.2 | NM_001025511 | -1.46                               | 1.69E-005 | 0.000393 |
| calm3b           | NM_199570    | -0.44                               | 1.77E-005 | 0.000409 |
| id2a             | NM_201291    | -0.79                               | 1.81E-005 | 0.000415 |
| rps19            | NM_200750    | -0.19                               | 1.87E-005 | 0.000426 |
| rps15a           | NM_212762    | -0.19                               | 1.95E-005 | 0.000443 |
| mbd3b            | NM_212580    | -1.20                               | 1.96E-005 | 0.000444 |
| si:ch211-51m24.3 | NM_001044858 | -0.96                               | 2.05E-005 | 0.000462 |
| zgc:158449       | NM_001082838 | -0.89                               | 2.05E-005 | 0.000462 |
| arl3l1           | NM_200693    | -4.70                               | 2.10E-005 | 0.000470 |
| zgc:158677       | NM_001082995 | -4.52                               | 2.10E-005 | 0.000470 |
| si:dkeyp-114f9.4 | NM_001044892 | -1.88                               | 2.25E-005 | 0.000502 |
| zgc:85741        | NM_001002166 | -1.00                               | 2.36E-005 | 0.000525 |
| rds2             | NM_131566    | -5.58                               | 3.05E-005 | 0.000675 |
| pvalb6           | NM_205573    | -1.78                               | 3.31E-005 | 0.000725 |
| rorab            | NM_201067    | -1.76                               | 3.31E-005 | 0.000725 |
| pax6b            | NM_131641    | -1.52                               | 3.38E-005 | 0.000737 |
| zgc:158363       | NM_001079973 | -0.62                               | 3.91E-005 | 0.000844 |
| si:dkey-98n4.1   | NM_001045191 | -1.06                               | 3.94E-005 | 0.000849 |
| rds4             | NM_131567    | -4.53                               | 4.01E-005 | 0.000861 |
| dynl12           | NM_213024    | -0.46                               | 4.05E-005 | 0.000869 |
| mip1             | NM_001003534 | -1.41                               | 4.08E-005 | 0.000872 |
| prdm8b           | NM_001105105 | -2.17                               | 4.23E-005 | 0.000902 |
| anp32a           | NM_199986    | -0.58                               | 4.27E-005 | 0.000908 |
| col4a5           | NM_001123230 | -0.86                               | 4.97E-005 | 0.001043 |
| smarcb1b         | NM_131448    | -1.20                               | 5.49E-005 | 0.001147 |
| zgc:92783        | NM_001002549 | -1.25                               | 5.53E-005 | 0.001152 |
| sfrs3b           | NM_201323    | -0.55                               | 6.52E-005 | 0.001347 |
| atp1b2b          | NM_131838    | -2.37                               | 6.62E-005 | 0.001365 |

## Down-regulated genes

| gene_id           | refSeq_mRNA  | fc(log <sub>2</sub> <i>mut/wt</i> ) | p-value   | FDR      |
|-------------------|--------------|-------------------------------------|-----------|----------|
| pvalb5            | NM_207167    | -1.07                               | 6.74E-005 | 0.001386 |
| bcl11a            | NM_001040391 | -1.36                               | 7.40E-005 | 0.001514 |
| zgc:103625        | NM_001004669 | -3.79                               | 7.63E-005 | 0.001558 |
| nat11             | NM_001017632 | -1.30                               | 7.66E-005 | 0.001559 |
| nr2f2             | NM_131183    | -0.91                               | 7.95E-005 | 0.001607 |
| meis1             | NM_131893    | -0.67                               | 8.31E-005 | 0.001673 |
| rbm4.1            | NM_199705    | -1.09                               | 8.72E-005 | 0.001751 |
| snap25a           | NM_131435    | -0.67                               | 8.78E-005 | 0.001755 |
| lmo1              | NM_173219    | -1.51                               | 8.77E-005 | 0.001755 |
| gpm6bb            | NM_001013334 | -1.15                               | 9.31E-005 | 0.001843 |
| sumo3             | NM_213124    | -0.55                               | 0.000103  | 0.002023 |
| stm               | NM_198817    | -1.07                               | 0.000104  | 0.002050 |
| ywhabl            | NM_199562    | -0.38                               | 0.000110  | 0.002153 |
| sparcl            | NM_001130605 | -2.24                               | 0.000113  | 0.002204 |
| zgc:158340        | NM_001079657 | -3.59                               | 0.000121  | 0.002318 |
| nme2l             | NM_199970    | -3.72                               | 0.000121  | 0.002318 |
| gnat1             | NM_131868    | -3.40                               | 0.000121  | 0.002318 |
| clstn1            | NM_001077784 | -0.68                               | 0.000126  | 0.002411 |
| zgc:171758        | NM_001109860 | -0.63                               | 0.000127  | 0.002411 |
| rrm1              | NM_131455    | -0.94                               | 0.000136  | 0.002565 |
| zgc:73358         | NM_213045    | -0.50                               | 0.000143  | 0.002690 |
| si:ch211-221n23.1 | NM_001082952 | -1.39                               | 0.000149  | 0.002792 |
| unc119.2          | NM_001040394 | -1.84                               | 0.000156  | 0.002903 |
| otpa              | NM_001128703 | -0.69                               | 0.000161  | 0.002978 |
| zgc:153948        | NM_001077276 | -1.90                               | 0.000170  | 0.003128 |
| fabp11a           | NM_001004682 | -0.59                               | 0.000171  | 0.003128 |
| zgc:101840        | NM_001005968 | -1.68                               | 0.000175  | 0.003202 |
| calm1a            | NM_213351    | -0.46                               | 0.000179  | 0.003254 |
| zgc:173495        | NM_001103134 | -2.41                               | 0.000180  | 0.003270 |
| zgc:77785         | NM_205678    | -1.18                               | 0.000183  | 0.003320 |
| top2a             | NM_001003834 | -1.27                               | 0.000187  | 0.003379 |
| zgc:92905         | NM_001005923 | -1.05                               | 0.000189  | 0.003417 |
| glula             | NM_181559    | -0.95                               | 0.000202  | 0.003635 |
| esrrg             | NM_212954    | -1.40                               | 0.000208  | 0.003726 |
| chn1              | NM_213000    | -1.35                               | 0.000208  | 0.003726 |
| ewsr1b            | NM_212630    | -0.60                               | 0.000211  | 0.003785 |
| MGC163045         | NM_001098755 | -3.42                               | 0.000221  | 0.003952 |
| zgc:165430        | NM_001099239 | -0.95                               | 0.000242  | 0.004281 |
| st13              | NM_199769    | -1.02                               | 0.000244  | 0.004303 |
| jmjd3             | NM_001030178 | -1.07                               | 0.000247  | 0.004333 |
| camk2d2           | NM_001002542 | -1.00                               | 0.000258  | 0.004519 |
| sox4b             | NM_200901    | -0.89                               | 0.000261  | 0.004565 |
| zgc:153440        | NM_001076658 | -0.76                               | 0.000269  | 0.004689 |
| cfi2l             | NM_213641    | -0.28                               | 0.000272  | 0.004717 |
| carm1             | NM_001003645 | -1.05                               | 0.000272  | 0.004717 |
| grk7a             | NM_001031841 | -4.45                               | 0.000275  | 0.004738 |
| si:ch211-233a1.5  | NM_001077300 | -4.28                               | 0.000275  | 0.004738 |
| pde6c             | NM_200871    | -4.09                               | 0.000275  | 0.004738 |
| dnl2l             | NM_001030000 | -1.38                               | 0.000303  | 0.005209 |

## Down-regulated genes

| gene_id    | refSeq_mRNA  | fc(log <sub>2</sub> <i>mut/wt</i> ) | p-value  | FDR      |
|------------|--------------|-------------------------------------|----------|----------|
| rcor2      | NM_205638    | -1.47                               | 0.000307 | 0.005263 |
| zgc:110069 | NM_001025301 | -0.65                               | 0.000313 | 0.005341 |
| mcm2       | NM_173257    | -1.25                               | 0.000317 | 0.005376 |
| zeb2a      | NM_001114551 | -1.20                               | 0.000317 | 0.005376 |
| tal2       | NM_201339    | -1.64                               | 0.000346 | 0.005782 |
| tuba8l3    | NM_001003558 | -1.51                               | 0.000355 | 0.005914 |
| zgc:136569 | NM_001045287 | -1.52                               | 0.000355 | 0.005914 |
| cbx1b      | NM_001002090 | -1.45                               | 0.000394 | 0.006521 |
| atf7ip     | NM_001077603 | -0.69                               | 0.000405 | 0.006682 |
| hes6       | NM_194400    | -1.11                               | 0.000438 | 0.007206 |
| appb       | NM_152886    | -0.64                               | 0.000453 | 0.007432 |
| cpsf6      | NM_001017993 | -0.78                               | 0.000472 | 0.007708 |
| ckmt1      | NM_198801    | -0.80                               | 0.000472 | 0.007708 |
| atp6v1al   | NM_201135    | -0.72                               | 0.000481 | 0.007825 |
| zgc:165461 | NM_001100139 | -2.53                               | 0.000488 | 0.007912 |
| epd        | NM_131005    | -2.87                               | 0.000488 | 0.007912 |
| rtn1b      | NM_001029948 | -0.69                               | 0.000499 | 0.008062 |
| lhx1a      | NM_131216    | -0.93                               | 0.000499 | 0.008062 |
| slc25a3l   | NM_200715    | -4.93                               | 0.000519 | 0.008344 |
| hnrnpa0l   | NM_001114881 | -0.40                               | 0.000531 | 0.008526 |
| gpm6ba     | NM_203427    | -1.46                               | 0.000535 | 0.008531 |
| slc32a1    | NM_001080701 | -1.18                               | 0.000535 | 0.008531 |
| atp6v1ba   | NM_182878    | -0.76                               | 0.000548 | 0.008705 |
| ilf3       | NM_212599    | -0.61                               | 0.000577 | 0.009138 |
| zgc:110045 | NM_001039984 | -1.67                               | 0.000606 | 0.009515 |
| sox14      | NM_001037680 | -1.65                               | 0.000606 | 0.009515 |
| zgc:110344 | NM_001020585 | -1.71                               | 0.000606 | 0.009515 |
| zic1       | NM_130933    | -1.14                               | 0.000610 | 0.009545 |
| lmo4l      | NM_212689    | -1.07                               | 0.000610 | 0.009545 |
| tuba8l4    | NM_200185    | -0.32                               | 0.000624 | 0.009737 |
| stmn1a     | NM_001040375 | -0.91                               | 0.000631 | 0.009838 |
| pou47      | NM_131160    | -1.26                               | 0.000636 | 0.009897 |
| vamp1      | NM_213398    | -0.91                               | 0.000685 | 0.010592 |
| sox2       | NM_213118    | -1.00                               | 0.000684 | 0.010592 |
| LOC794865  | NM_001082905 | -0.81                               | 0.000692 | 0.010644 |
| hnrnpu     | NM_001033595 | -0.57                               | 0.000690 | 0.010644 |
| cbx5       | NM_001080184 | -0.56                               | 0.000718 | 0.011035 |
| nfia       | NM_001079962 | -1.93                               | 0.000753 | 0.011462 |
| ndufa4     | NM_213025    | -0.80                               | 0.000760 | 0.011522 |
| zgc:110141 | NM_001017856 | -1.21                               | 0.000767 | 0.011591 |
| sox19a     | NM_130908    | -1.22                               | 0.000767 | 0.011591 |
| zgc:92164  | NM_001004554 | -0.70                               | 0.000794 | 0.011946 |
| ss18       | NM_199744    | -0.76                               | 0.000794 | 0.011946 |
| cct5       | NM_212613    | -0.46                               | 0.000801 | 0.012029 |
| rab3c      | NM_001002530 | -1.57                               | 0.000824 | 0.012327 |
| foxp2      | NM_001030082 | -1.05                               | 0.000846 | 0.012640 |
| elavl1     | NM_131452    | -0.72                               | 0.000860 | 0.012815 |
| zgc:154044 | NM_001076776 | -1.02                               | 0.000874 | 0.012978 |
| zgc:114196 | NM_001025546 | -2.10                               | 0.000912 | 0.013480 |

## Down-regulated genes

| gene_id    | refSeq_mRNA  | fc(log <sub>2</sub> <i>mut/wt</i> ) | p-value  | FDR      |
|------------|--------------|-------------------------------------|----------|----------|
| prkcbp1l   | NM_199641    | -0.94                               | 0.000923 | 0.013595 |
| ldb1a      | NM_131316    | -0.72                               | 0.000953 | 0.013985 |
| zgc:92712  | NM_001002395 | -4.49                               | 0.000977 | 0.014283 |
| pdc2       | NM_001025464 | -4.34                               | 0.000977 | 0.014283 |
| sncgb      | NM_001020652 | -0.51                               | 0.001006 | 0.014658 |
| zgc:92278  | NM_001002610 | -0.75                               | 0.001016 | 0.014783 |
| zgc:158335 | NM_001083844 | -0.47                               | 0.001084 | 0.015719 |
| zgc:110126 | NM_001017569 | -0.99                               | 0.001109 | 0.015942 |
| pou50      | NM_131161    | -0.98                               | 0.001109 | 0.015942 |
| syn2a      | NM_001002597 | -0.95                               | 0.001109 | 0.015942 |
| lim2.1     | NM_001020556 | -1.05                               | 0.001111 | 0.015948 |
| zgc:136952 | NM_001040043 | -0.13                               | 0.001118 | 0.016023 |
| marcks1l   | NM_213133    | -0.41                               | 0.001177 | 0.016845 |
| Tnni2      | NM_205742    | -0.20                               | 0.001184 | 0.016912 |
| zgc:109966 | NM_001020731 | -1.48                               | 0.001195 | 0.017014 |
| sept3      | NM_001024418 | -1.13                               | 0.001220 | 0.017287 |
| calm2a     | NM_199996    | -0.50                               | 0.001273 | 0.018003 |
| zgc:158869 | NM_001080673 | -1.16                               | 0.001294 | 0.018261 |
| smarce1    | NM_201298    | -0.49                               | 0.001295 | 0.018261 |
| zgc:165520 | NM_001099425 | -2.92                               | 0.001312 | 0.018316 |
| rybpa      | NM_201317    | -1.19                               | 0.001307 | 0.018316 |
| hug        | NM_130909    | -0.85                               | 0.001304 | 0.018316 |
| zgc:56141  | NM_213317    | -0.47                               | 0.001352 | 0.018807 |
| zgc:92039  | NM_001003486 | -0.86                               | 0.001429 | 0.019787 |
| ndrg1l     | NM_200692    | -1.54                               | 0.001450 | 0.020049 |
| sept8b     | NM_001083566 | -2.42                               | 0.001490 | 0.020458 |
| sox3       | NM_001001811 | -0.97                               | 0.001517 | 0.020694 |
| zgc:109949 | NM_001020730 | -2.27                               | 0.001544 | 0.021001 |
| sypb       | NM_001002501 | -1.35                               | 0.001547 | 0.021012 |
| atp6v1d    | NM_200960    | -0.75                               | 0.001647 | 0.022190 |
| zgc:85948  | NM_213235    | -0.58                               | 0.001645 | 0.022190 |
| msi1       | NM_001013516 | -1.14                               | 0.001820 | 0.024261 |
| cadm1a     | NM_001113551 | -1.17                               | 0.001820 | 0.024261 |
| zgc:110549 | NM_001017566 | -1.24                               | 0.001842 | 0.024391 |
| zgc:162551 | NM_213637    | -1.29                               | 0.001842 | 0.024391 |
| zgc:63523  | NM_200601    | -1.08                               | 0.001931 | 0.025385 |
| ncam1      | NM_131202    | -0.75                               | 0.001943 | 0.025491 |
| zgc:152760 | NM_001076577 | -4.84                               | 0.001953 | 0.025591 |
| zgc:110158 | NM_001020567 | -0.89                               | 0.002033 | 0.026437 |
| cnot6      | NM_212660    | -0.88                               | 0.002033 | 0.026437 |
| zgc:73355  | NM_200803    | -1.72                               | 0.002102 | 0.027255 |
| zgc:112198 | NM_001017708 | -1.13                               | 0.002118 | 0.027376 |
| lhx5       | NM_131218    | -1.11                               | 0.002118 | 0.027376 |
| zgc:110552 | NM_001017565 | -0.65                               | 0.002166 | 0.027910 |
| arnt2      | NM_131674    | -0.83                               | 0.002243 | 0.028768 |
| rpl35a     | NM_001002487 | -0.12                               | 0.002240 | 0.028768 |
| zgc:153988 | NM_001077376 | -0.76                               | 0.002313 | 0.029583 |
| zgc:136337 | NM_001042753 | -2.70                               | 0.002350 | 0.030008 |
| zgc:162402 | NM_001082939 | -0.67                               | 0.002400 | 0.030604 |

## Down-regulated genes

| gene_id          | refSeq_mRNA  | fc(log <sub>2</sub> <i>mut/wt</i> ) | p-value  | FDR      |
|------------------|--------------|-------------------------------------|----------|----------|
| zgc:110551       | NM_001020598 | -0.82                               | 0.002418 | 0.030781 |
| tuba8l           | NM_212772    | -0.38                               | 0.002526 | 0.031925 |
| rpl13a           | NM_212784    | -0.15                               | 0.002547 | 0.032102 |
| zgc:110622       | NM_001020751 | -1.08                               | 0.002548 | 0.032102 |
| rbpms2           | NM_200259    | -1.34                               | 0.002602 | 0.032550 |
| LOC555593        | NM_001128332 | -1.30                               | 0.002602 | 0.032550 |
| zgc:136878       | NM_001040248 | -2.04                               | 0.002599 | 0.032550 |
| vat1             | NM_001007051 | -0.68                               | 0.002673 | 0.033241 |
| fyna             | NM_001007286 | -1.17                               | 0.002670 | 0.033241 |
| lef1             | NM_131426    | -1.22                               | 0.002667 | 0.033241 |
| zgc:123242       | NM_001037387 | -1.18                               | 0.002670 | 0.033241 |
| zgc:100994       | NM_001003607 | -1.03                               | 0.002799 | 0.034708 |
| eno2             | NM_001003848 | -0.76                               | 0.002829 | 0.034977 |
| sf1              | NM_212653    | -0.66                               | 0.002844 | 0.035115 |
| zgc:77449        | NM_212899    | -0.79                               | 0.002888 | 0.035608 |
| zgc:171702       | NM_001103192 | -0.52                               | 0.003005 | 0.036936 |
| irx1a            | NM_207184    | -1.07                               | 0.003065 | 0.037628 |
| rpl19            | NM_213208    | -0.12                               | 0.003073 | 0.037664 |
| lgals1l1         | NM_001005958 | -0.83                               | 0.003183 | 0.038908 |
| ing4             | NM_001020468 | -0.71                               | 0.003259 | 0.039669 |
| capn3            | NM_001004571 | -0.60                               | 0.003255 | 0.039669 |
| sox5             | NM_001033585 | -0.99                               | 0.003353 | 0.040754 |
| tfa              | NM_001015057 | -0.68                               | 0.003538 | 0.042756 |
| zgc:92761        | NM_001002562 | -0.96                               | 0.003596 | 0.043278 |
| ctcf             | NM_001001844 | -0.72                               | 0.003625 | 0.043497 |
| zgc:165647       | NM_001100152 | -1.37                               | 0.003658 | 0.043832 |
| tnni2a.4         | NM_001009901 | -0.12                               | 0.003679 | 0.044027 |
| ube2e3           | NM_200921    | -0.51                               | 0.003687 | 0.044063 |
| ascl1b           | NM_131231    | -1.84                               | 0.003719 | 0.044319 |
| gnb5             | NM_200746    | -1.69                               | 0.003719 | 0.044319 |
| lhx4             | NM_001122973 | -1.26                               | 0.003802 | 0.045073 |
| acbd7            | NM_001128768 | -1.13                               | 0.003794 | 0.045073 |
| zic2a            | NM_131558    | -1.24                               | 0.003838 | 0.045359 |
| zgc:153588       | NM_001077290 | -1.61                               | 0.003933 | 0.046353 |
| mta2             | NM_214695    | -0.74                               | 0.004031 | 0.047342 |
| h2afx            | NM_201073    | -0.96                               | 0.004039 | 0.047342 |
| zgc:112335       | NM_001024422 | -0.99                               | 0.004039 | 0.047342 |
| zgc:65861        | NM_199552    | -0.31                               | 0.004066 | 0.047531 |
| ctbp1            | NM_131714    | -0.54                               | 0.004165 | 0.048471 |
| mag              | NM_001007062 | -2.83                               | 0.004181 | 0.048471 |
| zgc:77155        | NM_205673    | -0.53                               | 0.004177 | 0.048471 |
| wu:fq40g12       | NM_212571    | -0.93                               | 0.004165 | 0.048471 |
| si:dkey-260n20.1 | NM_001044899 | -1.37                               | 0.004324 | 0.049927 |
| isl2b            | NM_130964    | -1.34                               | 0.004324 | 0.049927 |
| si:dkey-52k20.12 | NM_001128716 | -1.98                               | 0.004344 | 0.049950 |
| si:dkey-46a12.1  | NM_001100065 | -0.99                               | 0.004335 | 0.049950 |

**Supplementary Table S2. List of up-regulated genes**

| gene_id    | refSeq_mRNA  | fc(log <sub>2</sub> <i>mut/wt</i> ) | p-value   | FDR       |
|------------|--------------|-------------------------------------|-----------|-----------|
| wu:cegs655 | NM_001007029 | 1.02                                | 0         | 0         |
| tpma       | NM_131105    | 0.56                                | 1.83E-175 | 7.85E-172 |
| krt4       | NM_131509    | 0.45                                | 1.32E-151 | 3.78E-148 |
| desm       | NM_130963    | 2.44                                | 6.67E-136 | 1.43E-132 |
| mylz2      | NM_131188    | 0.51                                | 6.46E-127 | 9.21E-124 |
| bhmt       | NM_001012480 | 1.14                                | 4.20E-090 | 4.49E-087 |
| gapdh      | NM_001115114 | 0.90                                | 2.11E-085 | 2.00E-082 |
| apoeb      | NM_131098    | 1.83                                | 1.24E-066 | 7.05E-064 |
| cyt1       | NM_131107    | 0.79                                | 1.53E-063 | 8.16E-061 |
| fn1b       | NM_001013261 | 3.76                                | 2.27E-048 | 9.23E-046 |
| zgc:92061  | NM_001002383 | 1.78                                | 4.48E-045 | 1.74E-042 |
| actc1l     | NM_001001409 | 0.73                                | 3.37E-040 | 1.03E-037 |
| krt18      | NM_178437    | 1.48                                | 9.70E-039 | 2.68E-036 |
| ctsl1a     | NM_212584    | 1.40                                | 4.58E-037 | 1.22E-034 |
| actn3      | NM_131522    | 0.81                                | 5.38E-037 | 1.40E-034 |
| c20orf149l | NM_200008    | 0.90                                | 5.90E-035 | 1.40E-032 |
| pvalb2     | NM_131516    | 0.23                                | 6.86E-033 | 1.54E-030 |
| hspb9      | NM_001114705 | 3.53                                | 7.82E-033 | 1.72E-030 |
| mdm2       | NM_131364    | 2.91                                | 5.39E-031 | 1.07E-028 |
| zgc:63663  | NM_200614    | 1.73                                | 1.86E-027 | 3.25E-025 |
| cyt1l      | NM_001082882 | 0.48                                | 5.61E-027 | 9.60E-025 |
| apoa1      | NM_131128    | 0.47                                | 1.14E-025 | 1.81E-023 |
| eno3       | NM_214723    | 0.79                                | 2.02E-025 | 3.15E-023 |
| pgk1       | NM_213387    | 1.13                                | 3.84E-024 | 5.66E-022 |
| smyhc1     | NM_001020507 | 0.99                                | 1.31E-023 | 1.87E-021 |
| tp53       | NM_131327    | 2.04                                | 1.88E-023 | 2.63E-021 |
| rplp0      | NM_131580    | 0.31                                | 1.48E-022 | 1.92E-020 |
| zgc:193613 | NM_001130586 | 0.58                                | 2.21E-022 | 2.82E-020 |
| junbl      | NM_212750    | 2.65                                | 2.30E-022 | 2.85E-020 |
| fos        | NM_205569    | 2.85                                | 2.28E-022 | 2.85E-020 |
| krt8       | NM_200080    | 0.77                                | 1.66E-021 | 2.03E-019 |
| zgc:110152 | NM_001017853 | 4.70                                | 3.80E-020 | 4.34E-018 |
| igfbp1     | NM_173283    | 3.49                                | 4.86E-020 | 5.47E-018 |
| zgc:91930  | NM_001003993 | 0.45                                | 7.59E-020 | 8.44E-018 |
| zgc:77231  | NM_200000    | 0.30                                | 1.88E-019 | 2.04E-017 |
| gstp1      | NM_131734    | 0.90                                | 3.11E-019 | 3.33E-017 |
| hspa8      | NM_001110403 | 0.29                                | 3.54E-019 | 3.74E-017 |
| ccng1      | NM_199481    | 0.86                                | 2.96E-018 | 2.95E-016 |
| zgc:110679 | NM_001017871 | 0.56                                | 4.56E-018 | 4.49E-016 |
| anxa2a     | NM_181761    | 1.44                                | 2.51E-017 | 2.34E-015 |
| myhz2      | NM_152982    | 0.66                                | 1.65E-016 | 1.45E-014 |
| timp2b     | NM_213296    | 3.90                                | 2.80E-016 | 2.45E-014 |
| ldb3b      | NM_199858    | 0.83                                | 3.29E-016 | 2.84E-014 |
| cebpd      | NM_131887    | 1.84                                | 7.36E-016 | 6.23E-014 |
| tdh        | NM_213245    | 1.45                                | 2.05E-015 | 1.69E-013 |
| myhz1      | NM_001115089 | 0.40                                | 2.36E-015 | 1.92E-013 |
| hsp47      | NM_131204    | 1.40                                | 3.58E-015 | 2.85E-013 |
| jph2       | NM_001089364 | 1.34                                | 4.03E-015 | 3.17E-013 |
| hbbe2      | NM_212846    | 1.02                                | 6.42E-015 | 4.99E-013 |

## Up-regulated genes

| gene_id           | refSeq_mRNA  | fc(log <sub>2</sub> <i>mut/wt</i> ) | p-value   | FDR       |
|-------------------|--------------|-------------------------------------|-----------|-----------|
| ckmb              | NM_001105683 | 0.19                                | 4.11E-014 | 3.03E-012 |
| hspb11            | NM_001099427 | 2.98                                | 7.71E-014 | 5.59E-012 |
| rps29             | NM_212953    | 0.28                                | 9.63E-014 | 6.87E-012 |
| socs3a            | NM_199950    | 3.72                                | 1.38E-013 | 9.69E-012 |
| mmp9              | NM_213123    | 4.23                                | 2.26E-013 | 1.56E-011 |
| zgc:92903         | NM_001002461 | 2.03                                | 2.77E-013 | 1.89E-011 |
| cebpb             | NM_131884    | 2.40                                | 9.95E-013 | 6.65E-011 |
| ckma              | NM_130932    | 0.20                                | 1.05E-012 | 6.95E-011 |
| gamt              | NM_001105595 | 0.57                                | 1.68E-012 | 1.11E-010 |
| aldoab            | NM_213215    | 0.41                                | 2.67E-012 | 1.72E-010 |
| si:ch211-158m24.7 | NM_001130666 | 0.37                                | 6.35E-012 | 3.88E-010 |
| psat1             | NM_200895    | 1.49                                | 7.26E-012 | 4.41E-010 |
| eef2k             | NM_001002740 | 1.50                                | 9.51E-012 | 5.73E-010 |
| zgc:66286         | NM_200516    | 0.57                                | 9.76E-012 | 5.84E-010 |
| chac1             | NM_001110126 | 1.04                                | 1.09E-011 | 6.45E-010 |
| sdc4l             | NM_001048149 | 1.14                                | 2.00E-011 | 1.15E-009 |
| socs3b            | NM_213304    | 2.59                                | 2.05E-011 | 1.17E-009 |
| mvp               | NM_201325    | 1.56                                | 2.11E-011 | 1.20E-009 |
| glulb             | NM_182866    | 0.91                                | 2.27E-011 | 1.28E-009 |
| hhatla            | NM_200887    | 0.81                                | 5.06E-011 | 2.78E-009 |
| zgc:77243         | NM_205544    | 0.70                                | 8.93E-011 | 4.75E-009 |
| si:ch211-203b8.5  | NM_001089363 | 1.35                                | 2.38E-010 | 1.23E-008 |
| zgc:162132        | NM_001089577 | 4.01                                | 2.46E-010 | 1.27E-008 |
| jun               | NM_199987    | 1.27                                | 3.35E-010 | 1.70E-008 |
| fabp1b            | NM_001024651 | 1.14                                | 4.18E-010 | 2.09E-008 |
| cd63              | NM_199543    | 1.09                                | 4.25E-010 | 2.10E-008 |
| mmp2              | NM_198067    | 1.29                                | 5.43E-010 | 2.67E-008 |
| ccn1              | NM_199740    | 1.39                                | 6.90E-010 | 3.34E-008 |
| acta1             | NM_131591    | 0.08                                | 7.32E-010 | 3.52E-008 |
| ctsba             | NM_213336    | 1.41                                | 8.02E-010 | 3.83E-008 |
| pygma             | NM_001020628 | 0.95                                | 1.30E-009 | 6.13E-008 |
| s100a10b          | NM_213003    | 0.77                                | 1.33E-009 | 6.21E-008 |
| zgc:56682         | NM_201004    | 0.95                                | 1.54E-009 | 7.18E-008 |
| pkm2b             | NM_001003488 | 0.51                                | 2.43E-009 | 1.11E-007 |
| vdac2             | NM_199585    | 0.44                                | 4.10E-009 | 1.83E-007 |
| odc1              | NM_131801    | 1.28                                | 4.33E-009 | 1.92E-007 |
| zgc:110064        | NM_001020565 | 0.96                                | 4.38E-009 | 1.93E-007 |
| zgc:100868        | NM_001003526 | 1.99                                | 5.15E-009 | 2.25E-007 |
| slc1a4            | NM_001002513 | 1.61                                | 5.61E-009 | 2.44E-007 |
| kbtbd10           | NM_198979    | 1.19                                | 6.49E-009 | 2.79E-007 |
| phlda3            | NM_001002455 | 2.35                                | 7.56E-009 | 3.20E-007 |
| ptgds             | NM_213634    | 1.13                                | 1.03E-008 | 4.29E-007 |
| rplp1             | NM_200029    | 0.18                                | 1.23E-008 | 5.07E-007 |
| junb              | NM_213556    | 1.98                                | 1.35E-008 | 5.52E-007 |
| kars              | NM_001002386 | 0.84                                | 1.53E-008 | 6.20E-007 |
| ssb               | NM_199547    | 1.36                                | 1.65E-008 | 6.64E-007 |
| LOC795785         | NM_001115060 | 3.12                                | 3.11E-008 | 1.18E-006 |
| klhl31            | NM_001003727 | 1.04                                | 3.37E-008 | 1.28E-006 |
| rplp2             | NM_212743    | 0.30                                | 5.48E-008 | 2.04E-006 |

## Up-regulated genes

| gene_id    | refSeq_mRNA  | fc(log <sub>2</sub> <i>mut/wt</i> ) | p-value   | FDR       |
|------------|--------------|-------------------------------------|-----------|-----------|
| tnni2b.1   | NM_001017587 | 1.14                                | 5.58E-008 | 2.06E-006 |
| glud1b     | NM_199545    | 0.99                                | 5.82E-008 | 2.13E-006 |
| rtn4a      | NM_001079912 | 0.71                                | 7.34E-008 | 2.67E-006 |
| tpm4       | NM_213158    | 1.03                                | 8.09E-008 | 2.91E-006 |
| c13orf22l  | NM_001003880 | 1.64                                | 9.37E-008 | 3.34E-006 |
| atp5g      | NM_131761    | 0.37                                | 9.74E-008 | 3.46E-006 |
| gadd45a1   | NM_200576    | 2.84                                | 1.01E-007 | 3.55E-006 |
| LOC556921  | NM_001099983 | 3.64                                | 1.31E-007 | 4.51E-006 |
| pdia4      | NM_199779    | 1.15                                | 1.32E-007 | 4.55E-006 |
| zgc:154065 | NM_001076564 | 2.59                                | 1.38E-007 | 4.74E-006 |
| zgc:56493  | NM_200023    | 0.57                                | 1.51E-007 | 5.13E-006 |
| fth1       | NM_131585    | 0.37                                | 1.67E-007 | 5.63E-006 |
| snrpf1     | NM_001003881 | 0.78                                | 1.68E-007 | 5.63E-006 |
| zgc:86810  | NM_001002119 | 0.55                                | 2.67E-007 | 8.71E-006 |
| lox12a     | NM_001099244 | 2.19                                | 2.78E-007 | 9.00E-006 |
| rrad       | NM_199798    | 2.67                                | 3.62E-007 | 1.17E-005 |
| psap       | NM_131883    | 0.71                                | 3.80E-007 | 1.21E-005 |
| zgc:100919 | NM_001002748 | 1.21                                | 4.51E-007 | 1.41E-005 |
| il6st      | NM_001113504 | 2.16                                | 4.57E-007 | 1.42E-005 |
| prpf31     | NM_200504    | 1.63                                | 5.35E-007 | 1.66E-005 |
| cav3       | NM_205738    | 0.83                                | 6.58E-007 | 2.01E-005 |
| hspe1      | NM_131526    | 0.69                                | 8.13E-007 | 2.46E-005 |
| pgam2      | NM_201024    | 0.53                                | 8.27E-007 | 2.49E-005 |
| LOC560626  | NM_001123257 | 1.06                                | 8.33E-007 | 2.50E-005 |
| cpn1       | NM_212770    | 1.18                                | 1.05E-006 | 3.14E-005 |
| rps26l     | NM_200742    | 0.22                                | 1.23E-006 | 3.65E-005 |
| rpl10      | NM_200027    | 0.19                                | 1.44E-006 | 4.22E-005 |
| ssr3       | NM_200053    | 0.63                                | 2.02E-006 | 5.79E-005 |
| zgc:73367  | NM_213034    | 0.18                                | 2.43E-006 | 6.88E-005 |
| lamc1      | NM_173277    | 0.95                                | 2.62E-006 | 7.40E-005 |
| zgc:64137  | NM_199645    | 0.88                                | 3.03E-006 | 8.38E-005 |
| zgc:154020 | NM_001077607 | 2.10                                | 3.31E-006 | 9.05E-005 |
| cdh1       | NM_131820    | 1.20                                | 4.15E-006 | 0.000113  |
| zgc:136871 | NM_001040379 | 3.13                                | 4.65E-006 | 0.000125  |
| zgc:192851 | NM_001134411 | 1.14                                | 4.70E-006 | 0.000125  |
| zgc:162968 | NM_001083553 | 1.14                                | 5.60E-006 | 0.000147  |
| zgc:171710 | NM_001110121 | 0.22                                | 5.92E-006 | 0.000154  |
| vcp        | NM_201481    | 0.51                                | 6.46E-006 | 0.000167  |
| zgc:91870  | NM_001002190 | 0.99                                | 6.79E-006 | 0.000175  |
| zgc:100799 | NM_001002732 | 1.35                                | 7.37E-006 | 0.000187  |
| snrpd3     | NM_001002081 | 1.08                                | 8.29E-006 | 0.000208  |
| fkbp5      | NM_213149    | 2.35                                | 8.96E-006 | 0.000224  |
| zgc:110459 | NM_001020596 | 1.50                                | 9.81E-006 | 0.000243  |
| tob1b      | NM_212974    | 1.04                                | 1.02E-005 | 0.000251  |
| slc25a4    | NM_214702    | 0.33                                | 1.27E-005 | 0.000308  |
| dusp6      | NM_194380    | 1.12                                | 1.31E-005 | 0.000315  |
| sart1      | NM_001002673 | 0.96                                | 1.34E-005 | 0.000321  |
| smyd2b     | NM_001030223 | 1.01                                | 1.75E-005 | 0.000404  |
| EIF2S2     | NM_212675    | 0.46                                | 1.81E-005 | 0.000415  |



## Up-regulated genes

| gene_id           | refSeq_mRNA  | fc(log <sub>2</sub> <i>mut/wt</i> ) | p-value   | FDR      |
|-------------------|--------------|-------------------------------------|-----------|----------|
| pdip5             | NM_197933    | 0.78                                | 1.81E-005 | 0.000415 |
| lgals1l2          | NM_212894    | 1.28                                | 1.89E-005 | 0.000431 |
| zgc:73197         | NM_200058    | 0.73                                | 2.29E-005 | 0.000510 |
| hif1a1            | NM_200405    | 0.73                                | 2.71E-005 | 0.000600 |
| rtn2a             | NM_001029965 | 0.68                                | 3.17E-005 | 0.000699 |
| rhoub             | NM_001017784 | 1.63                                | 3.33E-005 | 0.000728 |
| atf3              | NM_200964    | 2.65                                | 3.40E-005 | 0.000739 |
| thns12            | NM_001037566 | 3.40                                | 3.59E-005 | 0.000779 |
| stat3             | NM_131479    | 1.61                                | 3.76E-005 | 0.000815 |
| prpf3             | NM_205748    | 1.31                                | 4.32E-005 | 0.000917 |
| rpl36a            | NM_173262    | 0.18                                | 4.61E-005 | 0.000975 |
| rps2              | NM_213279    | 0.13                                | 4.76E-005 | 0.001005 |
| zgc:92615         | NM_001002703 | 0.98                                | 4.80E-005 | 0.001011 |
| cyp24a1l          | NM_001089458 | 3.02                                | 4.92E-005 | 0.001035 |
| phb               | NM_201297    | 0.63                                | 5.42E-005 | 0.001133 |
| tnfaip6           | NM_001040243 | 2.46                                | 5.95E-005 | 0.001235 |
| btf3              | NM_001076558 | 0.29                                | 6.06E-005 | 0.001255 |
| psmb7             | NM_001045564 | 0.47                                | 7.16E-005 | 0.001468 |
| ruvbl1            | NM_173835    | 0.94                                | 7.67E-005 | 0.001559 |
| mknk2b            | NM_194402    | 1.23                                | 7.85E-005 | 0.001592 |
| zgc:92066         | NM_001002378 | 0.49                                | 8.20E-005 | 0.001655 |
| si:ch211-122l24.4 | NM_001130655 | 3.10                                | 8.80E-005 | 0.001755 |
| ldha              | NM_131246    | 0.48                                | 8.95E-005 | 0.001781 |
| smyd1b            | NM_001039636 | 1.02                                | 9.21E-005 | 0.001828 |
| ybx1              | NM_131620    | 0.20                                | 9.92E-005 | 0.001960 |
| hsp90a.1          | NM_131328    | 0.83                                | 0.000109  | 0.002132 |
| zgc:158347        | NM_001082998 | 2.13                                | 0.000112  | 0.002192 |
| zgc:158664        | NM_001080198 | 0.63                                | 0.000114  | 0.002212 |
| hsp90b1           | NM_198210    | 0.48                                | 0.000115  | 0.002233 |
| zgc:162730        | NM_001089404 | 0.94                                | 0.000118  | 0.002276 |
| ahcy              | NM_199218    | 0.43                                | 0.000118  | 0.002282 |
| arg2              | NM_199611    | 3.08                                | 0.000121  | 0.002318 |
| fbl               | NM_213002    | 0.66                                | 0.000127  | 0.002421 |
| zgc:110304        | NM_001017593 | 0.49                                | 0.000136  | 0.002565 |
| zgc:91999         | NM_001003498 | 0.83                                | 0.000142  | 0.002670 |
| wu:fj23a05        | NM_001100074 | 1.75                                | 0.000142  | 0.002670 |
| gpd1b             | NM_199706    | 0.95                                | 0.000146  | 0.002739 |
| bzw1b             | NM_213092    | 0.97                                | 0.000150  | 0.002804 |
| bag3              | NM_001003533 | 1.76                                | 0.000156  | 0.002903 |
| c20orf45          | NM_199734    | 0.81                                | 0.000169  | 0.003117 |
| fstl1b            | NM_001039621 | 0.69                                | 0.000171  | 0.003128 |
| sf3a2             | NM_201043    | 0.69                                | 0.000171  | 0.003128 |
| zgc:110330        | NM_001017801 | 0.47                                | 0.000176  | 0.003207 |
| zgc:77517         | NM_200568    | 0.77                                | 0.000227  | 0.004041 |
| lsm6              | NM_001002077 | 0.66                                | 0.000228  | 0.004055 |
| hig1              | NM_200100    | 1.53                                | 0.000234  | 0.004162 |
| fga               | NM_001002039 | 1.35                                | 0.000244  | 0.004303 |
| tpm3              | NM_201492    | 0.48                                | 0.000245  | 0.004312 |
| myl9l             | NM_214699    | 0.36                                | 0.000286  | 0.004923 |

## Up-regulated genes

| gene_id            | refSeq_mRNA  | fc(log <sub>2</sub> <i>mut/wt</i> ) | p-value  | FDR      |
|--------------------|--------------|-------------------------------------|----------|----------|
| si:ch211-214j24.10 | NM_001025503 | 1.01                                | 0.000310 | 0.005298 |
| adsl               | NM_199899    | 0.65                                | 0.000313 | 0.005341 |
| pdlim1             | NM_001017870 | 1.16                                | 0.000317 | 0.005376 |
| zgc:123218         | NM_001037117 | 2.27                                | 0.000325 | 0.005483 |
| zgc:172278         | NM_001113337 | 2.32                                | 0.000325 | 0.005483 |
| itgb1b             | NM_001034987 | 0.91                                | 0.000333 | 0.005608 |
| ldb3               | NM_201505    | 0.52                                | 0.000335 | 0.005634 |
| zgc:194470         | NM_001128765 | 0.55                                | 0.000345 | 0.005782 |
| zgc:175091         | NM_001111226 | 1.68                                | 0.000346 | 0.005782 |
| eftud2             | NM_200508    | 0.91                                | 0.000368 | 0.006117 |
| dtng               | NM_199709    | 0.83                                | 0.000372 | 0.006170 |
| tpi1b              | NM_153668    | 0.39                                | 0.000423 | 0.006980 |
| stom               | NM_131758    | 0.92                                | 0.000477 | 0.007777 |
| si:dkey-204i11.1   | NM_001109739 | 3.29                                | 0.000519 | 0.008344 |
| gch2               | NM_131667    | 0.60                                | 0.000533 | 0.008531 |
| zgc:123068         | NM_001007132 | 2.08                                | 0.000535 | 0.008531 |
| si:dkey-25f3.3     | NM_001044875 | 2.06                                | 0.000546 | 0.008685 |
| myhc4              | NM_001020485 | 0.60                                | 0.000594 | 0.009390 |
| zgc:171630         | NM_001110374 | 0.97                                | 0.000606 | 0.009515 |
| mcl1a              | NM_131599    | 0.84                                | 0.000640 | 0.009935 |
| cfl2               | NM_205700    | 0.81                                | 0.000692 | 0.010644 |
| atp5a1             | NM_001077355 | 0.20                                | 0.000723 | 0.011086 |
| yars               | NM_201316    | 1.02                                | 0.000728 | 0.011136 |
| atp1b1a            | NM_131668    | 0.63                                | 0.000732 | 0.011181 |
| zgc:92215          | NM_001004586 | 0.66                                | 0.000736 | 0.011232 |
| zgc:113334         | NM_001013320 | 0.92                                | 0.000756 | 0.011487 |
| zgc:92586          | NM_001005932 | 0.77                                | 0.000794 | 0.011946 |
| casq2              | NM_001002682 | 0.57                                | 0.000810 | 0.012135 |
| tnnt3b             | NM_181653    | 0.10                                | 0.000868 | 0.012912 |
| kiaa0947l          | NM_001034965 | 1.93                                | 0.000878 | 0.013018 |
| zgc:152876         | NM_001077742 | 1.16                                | 0.000901 | 0.013337 |
| unc45b             | NM_153673    | 1.20                                | 0.000914 | 0.013489 |
| si:dkey-199i1.2    | NM_001102673 | 1.61                                | 0.000941 | 0.013829 |
| anxa1a             | NM_181758    | 0.46                                | 0.000982 | 0.014339 |
| jak1               | NM_131073    | 1.16                                | 0.001080 | 0.015681 |
| eno1               | NM_212722    | 0.30                                | 0.001091 | 0.015769 |
| ctnnb2             | NM_001001889 | 0.76                                | 0.001091 | 0.015769 |
| lmna               | NM_152971    | 1.70                                | 0.001193 | 0.017014 |
| psma4              | NM_214697    | 0.47                                | 0.001217 | 0.017287 |
| tnnt1              | NM_181499    | 1.12                                | 0.001220 | 0.017287 |
| zgc:112426         | NM_001017793 | 1.20                                | 0.001307 | 0.018316 |
| slc16a9a           | NM_200410    | 3.13                                | 0.001312 | 0.018316 |
| vegfaa             | NM_131408    | 2.58                                | 0.001312 | 0.018316 |
| atp5o              | NM_001003843 | 0.26                                | 0.001350 | 0.018805 |
| tuba8l2            | NM_200691    | 0.46                                | 0.001372 | 0.019052 |
| zgc:76871          | NM_213103    | 0.90                                | 0.001382 | 0.019159 |
| selt2              | NM_001098487 | 0.66                                | 0.001482 | 0.020451 |
| si:ch211-138a11.1  | NM_001114559 | 2.54                                | 0.001490 | 0.020458 |
| zgc:86706          | NM_001002068 | 0.27                                | 0.001506 | 0.020654 |

## Up-regulated genes

| gene_id           | refSeq_mRNA  | fc(log <sub>2</sub> <i>mut/wt</i> ) | p-value  | FDR      |
|-------------------|--------------|-------------------------------------|----------|----------|
| prpf39            | NM_001004520 | 0.58                                | 0.001513 | 0.020682 |
| cd81              | NM_131518    | 0.35                                | 0.001512 | 0.020682 |
| gadd45bl          | NM_001012386 | 2.25                                | 0.001544 | 0.021001 |
| mat1a             | NM_199871    | 1.18                                | 0.001550 | 0.021021 |
| si:dkey-42i9.6    | NM_001044870 | 0.83                                | 0.001565 | 0.021183 |
| cox7c             | NM_199995    | 0.28                                | 0.001628 | 0.022010 |
| zgc:174888        | NM_001113584 | 1.59                                | 0.001658 | 0.022284 |
| rtn2b             | NM_001029959 | 0.96                                | 0.001659 | 0.022284 |
| itm2bl            | NM_212976    | 0.85                                | 0.001709 | 0.022925 |
| asns              | NM_201163    | 1.31                                | 0.001769 | 0.023689 |
| psmb1             | NM_001003889 | 0.47                                | 0.001801 | 0.024080 |
| lifrb             | NM_001113732 | 3.57                                | 0.001831 | 0.024365 |
| wdr82             | NM_001009897 | 1.34                                | 0.001842 | 0.024391 |
| cmlc1             | NM_131692    | 1.29                                | 0.001868 | 0.024704 |
| uqcrb             | NM_001024442 | 0.32                                | 0.001882 | 0.024853 |
| eif4ebp2          | NM_212803    | 0.49                                | 0.001890 | 0.024913 |
| zgc:103420        | NM_001006043 | 1.08                                | 0.001931 | 0.025385 |
| zgc:77429         | NM_213262    | 0.42                                | 0.001967 | 0.025692 |
| kny               | NM_131860    | 0.95                                | 0.001993 | 0.025992 |
| zp3a.2            | NM_001030120 | 1.85                                | 0.002102 | 0.027255 |
| ppib              | NM_213019    | 0.25                                | 0.002141 | 0.027627 |
| zgc:136833        | NM_001039982 | 1.50                                | 0.002221 | 0.028581 |
| pgm1              | NM_201025    | 0.58                                | 0.002247 | 0.028777 |
| hyou1             | NM_212703    | 0.84                                | 0.002447 | 0.031061 |
| rapsn             | NM_178305    | 1.09                                | 0.002444 | 0.031061 |
| cacna1s           | NM_214726    | 1.02                                | 0.002479 | 0.031428 |
| zgc:194249        | NM_001130591 | 0.55                                | 0.002498 | 0.031621 |
| casp8             | NM_131510    | 2.51                                | 0.002577 | 0.032423 |
| clu               | NM_200802    | 1.34                                | 0.002602 | 0.032550 |
| zgc:110617        | NM_001020612 | 0.78                                | 0.002829 | 0.034977 |
| zgc:154116        | NM_001077259 | 1.02                                | 0.002985 | 0.036752 |
| cox17             | NM_001004652 | 0.54                                | 0.003118 | 0.038168 |
| cnn3a             | NM_199753    | 0.73                                | 0.003259 | 0.039669 |
| pck1              | NM_214751    | 2.87                                | 0.003418 | 0.041422 |
| il4r              | NM_001013282 | 3.39                                | 0.003418 | 0.041422 |
| crtap             | NM_001001406 | 0.83                                | 0.003505 | 0.042413 |
| si:ch211-219i10.1 | NM_001030062 | 1.06                                | 0.003545 | 0.042778 |
| zgc:136474        | NM_001045308 | 0.47                                | 0.003565 | 0.042966 |
| rps21             | NM_201191    | 0.12                                | 0.003605 | 0.043315 |
| spint1a           | NM_213152    | 0.94                                | 0.003747 | 0.044583 |
| zgc:92239         | NM_001008579 | 0.56                                | 0.003803 | 0.045073 |
| zgc:76966         | NM_212869    | 0.99                                | 0.003836 | 0.045359 |
| ob                | NM_001128576 | 33.71                               | 0.003906 | 0.046099 |
| cd9l              | NM_213428    | 0.70                                | 0.004031 | 0.047342 |
| zgc:171577        | NM_001110124 | 1.05                                | 0.004065 | 0.047531 |
| zgc:161979        | NM_001045488 | 0.52                                | 0.004171 | 0.048471 |
| adam8a            | NM_200637    | 2.38                                | 0.004181 | 0.048471 |
| zgc:158334        | NM_001080619 | 2.28                                | 0.004344 | 0.049950 |

## S3\_sk1E

**Supplementary Table S3. List of single-exon skipping targets**

Targets selected and positively validated by RT-PCR are in red/bold under gene\_id

| gene_id        | AS          | skip  | incl_1 | incl_2 | incl_3 | alt.exon / refSeq      | chr | position_alt.exon  |
|----------------|-------------|-------|--------|--------|--------|------------------------|-----|--------------------|
| abcc4          | <b>mut+</b> | 30,06 | -0,09  | -0,62  | 0,17   | exon-10 / NM_001007038 | 6   | 3107159..3107248   |
| abcf1          | <b>mut+</b> | 30,73 | -0,11  | -0,10  | -0,38  | exon-26 / NM_213186    | 19  | 28525516..28525588 |
| <b>abcf1</b>   | <b>mut+</b> | 2,40  | -0,49  | -0,36  | -0,40  | exon-7 / NM_213186     | 19  | 28513572..28513631 |
| acvr1          | <b>mut+</b> | 3,33  | -0,68  | -0,46  | 0,03   | exon-2 / NM_131345     | 2   | 51261750..51261825 |
| ada            | <b>mut+</b> | 27,73 | -0,59  | -1,08  | -1,19  | exon-2 / NM_001002646  | 23  | 24408995..24409056 |
| adcyap1b       | <b>mut+</b> | 0,54  | -0,98  | -1,22  | -1,00  | exon-4 / NM_214715     | 2   | 25739121..25739225 |
| adcyap1r1      | <b>mut+</b> | 0,65  | -1,29  | -0,38  | -2,60  | exon-5 / NM_001013444  | 9   | 1203982..1204065   |
| adipor1a       | <b>mut+</b> | 30,06 | -0,33  | -0,15  | -0,36  | exon-2 / NM_001002467  | 11  | 22020035..22020111 |
| alcam          | <b>mut+</b> | 0,40  | -0,88  | -1,09  | -1,10  | exon-13 / NM_131000    | 10  | 23337197..23337223 |
| atp1b2a        | <b>mut+</b> | 0,57  | -1,93  | -3,28  | -1,84  | exon-5a / NM_131669    | 23  | 40615220..40615243 |
| atp2b2         | <b>mut+</b> | 2,82  | -1,32  | -1,25  | -1,19  | exon-5 / NM_001123238  | 11  | 37966719..37966751 |
| bin2           | <b>mut+</b> | 27,73 | -1,09  | -0,82  | -0,55  | exon-2 / NM_001007421  | 23  | 32512260..32512409 |
| birc5a         | <b>mut+</b> | 3,08  | -0,57  | -0,13  | -0,12  | exon-3 / NM_194397     | 12  | 31698782..31698899 |
| <b>btbd10a</b> | <b>mut+</b> | 29,32 | -0,54  | -0,85  | -1,08  | exon-8 / NM_001110459  | 25  | 8451431..8451541   |
| c15orf15       | <b>mut+</b> | 30,06 | -0,27  | -0,14  | -0,25  | exon-4 / NM_212993     | 25  | 4257138..4257201   |
| <b>c2orf24</b> | <b>mut+</b> | 3,16  | -1,11  | -0,71  | -0,88  | exon-6 / NM_199928     | 1   | 2783637..2783698   |
| capn1a         | <b>mut+</b> | 27,73 | -1,05  | -1,02  | -0,82  | exon-16 / NM_200445    | 13  | 44699758..44699815 |
| <b>cbx5</b>    | <b>mut+</b> | 2,02  | -0,39  | -0,70  | -0,34  | exon-2 / NM_001080184  | 23  | 33952424..33952498 |
| cd99l2         | <b>mut+</b> | 1,35  | -0,60  | -0,26  | -0,09  | exon-4a / NM_194369    | 7   | 16870106..16870213 |
| cdc123         | <b>mut+</b> | 27,73 | -1,24  | -1,08  | -1,55  | exon-10 / NM_200721    | 4   | 5744118..5744146   |
| cdc14b         | <b>mut+</b> | 30,54 | -0,82  | -0,62  | -0,77  | exon-13 / NM_200179    | 8   | 55892736..55892783 |
| <b>cdkn1b</b>  | <b>mut+</b> | 3,82  | -0,42  | -0,40  | -0,58  | exon-2 / NM_212792     | 25  | 1508423..1508539   |
| cdkrap3        | <b>mut+</b> | 29,73 | -1,21  | -1,33  | -1,55  | exon-2 / NM_001002105  | 12  | 23568532..23568577 |
| ck2a1          | <b>mut+</b> | 3,24  | -0,33  | -0,05  | -0,30  | exon-14 / NM_131252    | 16  | 28090258..28090347 |
| cops8          | <b>mut+</b> | 31,90 | -0,67  | -0,38  | -0,81  | exon-2 / NM_200229     | 9   | 17245234..17245304 |
| cox17          | <b>mut+</b> | 32,32 | -0,28  | 0,03   | -0,18  | exon-3 / NM_001004652  | 9   | 14585490..14585604 |
| crb2           | <b>mut+</b> | 30,32 | -0,24  | -1,88  | -0,30  | exon-11 / NM_001045299 | 21  | 39079464..39079580 |
| ctnnb1         | <b>mut+</b> | 0,26  | -1,04  | -1,09  | -1,14  | exon-8a / NM_131059    | 16  | 2098381..2098407   |
| dap1a          | <b>mut+</b> | 30,32 | -0,20  | -0,08  | -0,28  | exon-3 / NM_131572     | 24  | 20664956..20664998 |
| dap3           | <b>mut+</b> | 2,39  | -0,71  | -0,96  | -0,33  | exon-8 / NM_001098737  | 16  | 10749259..10749339 |
| dcun1d4        | <b>mut+</b> | 30,54 | -0,49  | -0,90  | -0,64  | exon-3 / NM_001032366  | 20  | 24976797..24976836 |

## S3\_sk1E

|                  |             |       |       |       |       |                        |    |                    |
|------------------|-------------|-------|-------|-------|-------|------------------------|----|--------------------|
| ddef2a           | <b>mut+</b> | 27,73 | -1,67 | -2,22 | -1,12 | exon-2 / NM_001045207  | 17 | 25024077..25024149 |
| dmd              | <b>mut+</b> | 0,67  | -1,29 | -1,14 | -1,56 | exon-11 / NM_131785    | 4  | 8566149..8566214   |
| <b>dnmt7</b>     | <b>mut+</b> | 1,28  | -1,09 | -0,99 | -0,40 | exon-7a / NM_001020476 | 8  | 21790527..21790658 |
| dpcc             | <b>mut+</b> | 31,32 | -1,29 | -1,76 | -1,17 | exon-5 / NM_001045377  | 1  | 29433383..29433485 |
| drg2             | <b>mut+</b> | 2,93  | -0,53 | -0,62 | -0,72 | exon-4 / NM_212638     | 3  | 37969136..37969225 |
| eef2k            | <b>mut+</b> | 0,26  | -1,35 | -1,15 | -1,35 | exon-2a / NM_001002740 | 12 | 8750617..8750673   |
| <b>ef3c</b>      | <b>mut+</b> | 2,19  | -0,47 | -0,85 | -0,64 | exon-21a / NM_213463   | 12 | 1890233..1890283   |
| elavl1           | <b>mut+</b> | 1,48  | -0,53 | -0,14 | -0,12 | exon-3 / NM_131452     | 2  | 35670371..35670474 |
| <b>elavl4</b>    | <b>mut+</b> | 0,24  | -0,63 | -0,61 | -0,79 | exon-7 / NM_131453     | 8  | 48143998..48144036 |
| ewsr1b           | <b>mut+</b> | 1,37  | -0,27 | -0,26 | -0,25 | exon-8 / NM_212630     | 5  | 14418955..14418992 |
| fam3c            | <b>mut+</b> | 30,54 | -0,54 | -0,66 | -0,55 | exon-4 / NM_212725     | 4  | 20849573..20849599 |
| <b>fam76b</b>    | <b>mut+</b> | 30,06 | -0,42 | -0,92 | -0,89 | exon-3 / NM_199932     | 5  | 13135384..13135438 |
| fkbp7            | <b>mut+</b> | 30,54 | -0,10 | -0,42 | -0,30 | exon-2 / NM_001004506  | 9  | 36686956..36687107 |
| fstl1a           | <b>mut+</b> | 30,32 | -0,53 | -0,08 | -0,16 | exon-5 / NM_001017860  | 1  | 44419858..44419890 |
| gamt             | <b>mut+</b> | 4,31  | -0,02 | -0,24 | -0,17 | exon-4 / NM_001105595  | 11 | 5186293..5186360   |
| gna12            | <b>mut+</b> | 27,73 | -0,93 | -1,62 | -1,20 | exon-3 / NM_001013277  | 3  | 39510295..39510345 |
| golim4a          | <b>mut+</b> | 30,32 | -0,99 | -0,17 | -0,81 | exon-3 / NM_001098192  | 18 | 48020971..48021024 |
| gtpbp1           | <b>mut+</b> | 1,24  | -0,65 | -0,98 | -0,36 | exon-11a / NM_213475   | 3  | 31228716..31228754 |
| gtpbp1           | <b>mut+</b> | 2,23  | -0,64 | -0,30 | -0,60 | exon-2 / NM_213475     | 3  | 31216404..31216515 |
| hccs             | <b>mut+</b> | 2,70  | -0,34 | -0,11 | -0,25 | exon-6 / NM_201451     | 24 | 29860026..29860112 |
| hnrpd1           | <b>mut+</b> | 0,68  | -0,43 | -2,32 | -0,16 | exon-8 / NM_213392     | 10 | 2425148..2425251   |
| hsf1             | <b>mut+</b> | 1,69  | -1,81 | -1,21 | -1,53 | exon-10 / NM_131600    | 19 | 701012..701089     |
| <b>hsp47</b>     | <b>mut+</b> | 0,95  | -2,69 | -2,53 | -2,01 | exon-2 / NM_131204     | 15 | 30438117..30438164 |
| ikbkg            | <b>mut+</b> | 2,13  | -1,67 | -1,26 | -1,52 | exon-6a / NM_001014344 | 23 | 16442075..16442122 |
| im:7153495       | <b>mut+</b> | 0,83  | -1,31 | -1,49 | -1,20 | exon-9 / NM_001100007  | 2  | 15088168..15088227 |
| im:7159661       | <b>mut+</b> | 3,38  | -0,67 | -0,78 | 0,14  | exon-10 / NM_001079980 | 1  | 27162557..27162637 |
| imp4             | <b>mut+</b> | 30,32 | -0,69 | -0,73 | -0,06 | exon-8 / NM_001002719  | 5  | 18696756..18696829 |
| isoc2            | <b>mut+</b> | 0,67  | -1,16 | -1,14 | -0,87 | exon-5 / NM_001079953  | 16 | 9535207..9535277   |
| kars             | <b>mut+</b> | 0,46  | -1,77 | -2,63 | -1,12 | exon-2 / NM_001002386  | 7  | 66853175..66853305 |
| <b>khdrbs1</b>   | <b>mut+</b> | 1,67  | -0,47 | -0,54 | -0,46 | exon-7 / NM_130925     | 13 | 40660102..40660175 |
| LOC100005403     | <b>mut+</b> | 31,64 | -0,51 | -0,06 | -0,31 | exon-2 / NM_001128812  | 19 | 29267471..29267515 |
| <b>LOC562370</b> | <b>mut+</b> | 1,16  | -0,62 | -0,89 | -0,45 | exon-9a / NM_001105588 | 2  | 27099181..27099237 |
| LOC564395        | <b>mut+</b> | 1,43  | -0,31 | -0,95 | -0,53 | exon-2 / NM_001045051  | 18 | 14522715..14522771 |
| LOC565206        | <b>mut+</b> | 30,06 | -0,29 | -0,49 | -0,02 | exon-27 / NM_001128537 | 8  | 1871472..1871535   |
| <b>LOC567533</b> | <b>mut+</b> | 0,43  | -1,42 | -1,62 | -1,38 | exon-5a / NM_001089415 | 5  | 3462254..3462274   |

## S3\_sk1E

|               |             |       |       |        |        |                         |    |                    |
|---------------|-------------|-------|-------|--------|--------|-------------------------|----|--------------------|
| LOC794796     | <b>mut+</b> | 28,73 | -0,50 | -2,09  | -1,06  | exon-17 / NM_001111217  | 21 | 12804105..12804170 |
| lta4h         | <b>mut+</b> | 31,06 | -0,74 | -0,45  | -0,59  | exon-9 / NM_213286      | 4  | 5964124..5964147   |
| mak16         | <b>mut+</b> | 31,19 | -1,15 | -1,71  | -0,92  | exon-2 / NM_173239      | 8  | 41716621..41716670 |
| mapk10        | <b>mut+</b> | 0,43  | -1,76 | -29,53 | -28,72 | exon-2 / NM_001037701   | 21 | 36784297..36784343 |
| mark3         | <b>mut+</b> | 30,06 | -0,23 | -0,28  | -0,83  | exon-3 / NM_199885      | 13 | 16955915..16955968 |
| matn3b        | <b>mut+</b> | 1,73  | -0,70 | -0,73  | -0,11  | exon-4 / NM_001012385   | 13 | 32111943..32112074 |
| <b>mbnl2b</b> | <b>mut+</b> | 0,48  | -1,27 | -1,56  | -1,31  | exon-4a / NM_001099998  | 1  | 754211..754264     |
| mcam          | <b>mut+</b> | 0,85  | -1,64 | -0,73  | -2,05  | exon-13a / NM_001012367 | 15 | 22870195..22870233 |
| mdm2          | <b>mut+</b> | 32,90 | -0,65 | -0,31  | -0,58  | exon-2 / NM_131364      | 4  | 27591518..27591592 |
| mef2b         | <b>mut+</b> | 1,21  | -1,66 | -1,75  | -0,66  | exon-5 / NM_001098247   | 22 | 21064946..21065019 |
| mibp2         | <b>mut+</b> | 1,41  | -0,30 | -0,05  | -0,13  | exon-3 / NM_198877      | 18 | 2960618..2960666   |
| myo6a         | <b>mut+</b> | 27,73 | -1,92 | -1,31  | -1,50  | exon-6 / NM_001004111   | 20 | 515517..515572     |
| nadl1.1       | <b>mut+</b> | 27,73 | -0,42 | -1,58  | -0,63  | exon-26 / NM_131383     | 23 | 604518..604649     |
| nap1l1        | <b>mut+</b> | 4,74  | -0,20 | -0,30  | -0,31  | exon-2 / NM_201318      | 4  | 2464582..2464623   |
| nap1l1        | <b>mut+</b> | 0,22  | -1,40 | -1,42  | -1,35  | exon-14a / NM_201318    | 4  | 2484007..2484038   |
| <b>nap1l4</b> | <b>mut+</b> | 0,74  | -0,86 | -0,56  | -0,94  | exon-14 / NM_001089347  | 25 | 19772224..19772256 |
| ndrg1         | <b>mut+</b> | 2,40  | -0,62 | -0,69  | -0,77  | exon-13 / NM_213348     | 19 | 32479463..32479514 |
| <b>ndrg3a</b> | <b>mut+</b> | 4,43  | -1,14 | -1,46  | -1,06  | exon-3 / NM_199517      | 11 | 22328854..22328886 |
| neo1          | <b>mut+</b> | 0,42  | -1,02 | -1,28  | -0,67  | exon-21 / NM_173218     | 7  | 58707722..58707754 |
| nf2           | <b>mut+</b> | 30,06 | -1,00 | -1,12  | -0,98  | exon-8 / NM_212951      | 21 | 16143773..16143848 |
| nmd3          | <b>mut+</b> | 30,32 | -0,08 | -0,53  | -0,03  | exon-2 / NM_001013569   | 15 | 3169547..3169592   |
| nr1d2b        | <b>mut+</b> | 2,54  | -0,42 | 0,19   | -0,24  | exon-3 / NM_131065      | 19 | 9114539..9114627   |
| nupl1         | <b>mut+</b> | 29,73 | -0,71 | -1,02  | -0,83  | exon-10 / NM_213229     | 24 | 23603879..23603961 |
| oxsr1a        | <b>mut+</b> | 30,06 | -0,47 | -0,60  | -1,04  | exon-15 / NM_001098747  | 2  | 19264092..19264144 |
| pccb          | <b>mut+</b> | 30,32 | -0,07 | -0,10  | -0,42  | exon-2 / NM_212925      | 2  | 20572363..20572482 |
| <b>pdha1</b>  | <b>mut+</b> | 0,47  | -0,60 | -0,64  | -0,44  | exon-1a / NM_213393     | 5  | 13586552..13586572 |
| phactr4       | <b>mut+</b> | 27,73 | -0,91 | -1,04  | -1,64  | exon-3 / NM_200670      | 16 | 40775575..40775619 |
| phf5a         | <b>mut+</b> | 30,73 | -0,45 | -0,60  | -0,44  | exon-2 / NM_173266      | 12 | 18431321..18431344 |
| pitpna        | <b>mut+</b> | 31,73 | -0,80 | -0,73  | -0,24  | exon-2 / NM_200935      | 15 | 26029577..26029607 |
| pmp22a        | <b>mut+</b> | 1,06  | -1,74 | 0,11   | -1,47  | exon-2 / NM_201311      | 3  | 60429272..60429365 |
| <b>postn</b>  | <b>mut+</b> | 0,74  | -0,60 | -0,94  | -0,87  | exon-20 / NM_203421     | 15 | 25155128..25155163 |
| ppme1         | <b>mut+</b> | 3,74  | -0,26 | -0,63  | 0,07   | exon-11 / NM_199937     | 21 | 16565804..16565848 |
| prelid1       | <b>mut+</b> | 3,57  | -0,45 | 0,08   | -0,54  | exon-4 / NM_200366      | 14 | 11955759..11955872 |
| prmt5         | <b>mut+</b> | 31,06 | -0,40 | -0,43  | 0,14   | exon-11 / NM_001007183  | 2  | 34440563..34440685 |
| <b>prrx1b</b> | <b>mut+</b> | 2,08  | -1,26 | -1,22  | -0,85  | exon-3a / NM_200050     | 20 | 32743157..32743218 |

## S3\_sk1E

|                   |             |       |       |        |        |                         |    |                    |
|-------------------|-------------|-------|-------|--------|--------|-------------------------|----|--------------------|
| ptk2.1            | <b>mut+</b> | 0,27  | -1,08 | -1,47  | -1,76  | exon-14a / NM_131796    | 16 | 27451133..27451150 |
| ptpn4             | <b>mut+</b> | 27,73 | -1,05 | -0,89  | -0,61  | exon-5 / NM_001007200   | 9  | 22886479..22886523 |
| ptpra             | <b>mut+</b> | 1,73  | -1,53 | -1,76  | -1,67  | exon-5 / NM_131888      | 21 | 8028898..8028909   |
| puf60b            | <b>mut+</b> | 3,77  | -0,40 | -0,49  | -0,07  | exon-6 / NM_001002121   | 7  | 37033465..37033557 |
| puf60b            | <b>mut+</b> | 3,77  | -0,36 | -0,04  | -0,37  | exon-2 / NM_001002121   | 7  | 37028237..37028316 |
| rac1              | <b>mut+</b> | 31,82 | -0,28 | 0,18   | -0,28  | exon-2 / NM_199771      | 12 | 8819999..8820070   |
| rae1              | <b>mut+</b> | 30,06 | -0,38 | -0,20  | 0,03   | exon-5 / NM_200998      | 6  | 47171780..47171866 |
| rbm39a            | <b>mut+</b> | 2,32  | -0,53 | -0,26  | -0,57  | exon-5 / NM_001012304   | 11 | 21558010..21558075 |
| rgs7              | <b>mut+</b> | 2,03  | -2,28 | -1,54  | -1,65  | exon-17 / NM_001002541  | 17 | 18405553..18405592 |
| rhbdl3            | <b>mut+</b> | 3,74  | -2,21 | -29,37 | -2,00  | exon-8 / NM_001017556   | 6  | 42804401..42804461 |
| rnd2              | <b>mut+</b> | 29,32 | -0,45 | -1,43  | -1,14  | exon-4 / NM_001045364   | 3  | 16890421..16890555 |
| rpl71             | <b>mut+</b> | 30,54 | -0,40 | -0,27  | 0,12   | exon-5 / NM_199590      | 20 | 30585643..30585752 |
| rtn4b             | <b>mut+</b> | 2,33  | -0,24 | -0,02  | -0,76  | exon-3 / NM_001040335   | 13 | 51543573..51543617 |
| sb:cb363          | <b>mut+</b> | 1,89  | -1,53 | -2,28  | -1,78  | exon-2 / NM_001122654   | 11 | 42312772..42312822 |
| <b>scrib</b>      | <b>mut+</b> | 0,71  | -0,60 | -0,67  | -1,68  | exon-27a / NM_001007175 | 7  | 37131010..37131066 |
| sec11a            | <b>mut+</b> | 30,06 | -0,30 | -0,27  | -0,25  | exon-5 / NM_001002521   | 18 | 46242428..46242485 |
| sec22bb           | <b>mut+</b> | 0,55  | -2,14 | -2,23  | -2,23  | exon-1a / NM_201302     | 8  | 17271560..17271571 |
| sec63             | <b>mut+</b> | 32,06 | -0,92 | -0,98  | -0,27  | exon-19 / NM_001002588  | 20 | 34768136..34768240 |
| selt1b            | <b>mut+</b> | 30,06 | -0,31 | 0,09   | -0,68  | exon-2 / NM_178292      | 18 | 38161770..38161880 |
| sep15             | <b>mut+</b> | 4,44  | -0,33 | -0,39  | -0,28  | exon-4 / NM_178294      | 2  | 17930529..17930578 |
| sept3             | <b>mut+</b> | 3,51  | -0,93 | -0,58  | 0,14   | exon-5 / NM_001024418   | 1  | 39932524..39932661 |
| serhl             | <b>mut+</b> | 30,54 | -0,42 | -0,34  | -0,82  | exon-4 / NM_199615      | 1  | 39970263..39970376 |
| sesn3             | <b>mut+</b> | 30,32 | -0,54 | -0,23  | -0,57  | exon-2 / NM_213519      | 15 | 31772882..31772938 |
| setdb1b           | <b>mut+</b> | 30,32 | -0,10 | -0,25  | -0,18  | exon-21 / NM_001077277  | 16 | 18716819..18716907 |
| sfrs3a            | <b>mut+</b> | 30,73 | -0,30 | -0,61  | -0,61  | exon-2 / NM_001002053   | 6  | 27938227..27938261 |
| <b>sfrs6</b>      | <b>mut+</b> | 4,73  | -0,46 | -0,24  | 0,19   | exon-2 / NM_001008732   | 11 | 393010..393896     |
| sgce              | <b>mut+</b> | 27,73 | -0,55 | -1,07  | -0,66  | exon-4 / NM_001002594   | 19 | 37749736..37749808 |
| sgce              | <b>mut+</b> | 1,37  | -3,46 | -2,66  | -30,97 | exon-10a / NM_001002594 | 19 | 37731018..37731055 |
| sh3gl2            | <b>mut+</b> | 30,06 | -0,24 | -0,14  | -0,63  | exon-2 / NM_201116      | 1  | 25027359..25027427 |
| si:ch211-114c12.2 | <b>mut+</b> | 30,54 | -0,72 | -1,08  | -0,08  | exon-2 / NM_001002300   | 5  | 13673101..13673162 |
| si:ch211-181h6.2  | <b>mut+</b> | 27,73 | -1,27 | -1,79  | -0,71  | exon-4 / NM_001029960   | 20 | 29333447..29333516 |
| si:ch211-22i13.2  | <b>mut+</b> | 30,90 | -0,32 | -0,39  | -0,37  | exon-5 / NM_001020779   | 20 | 15421857..15421946 |
| si:ch211-276g21.1 | <b>mut+</b> | 30,73 | -0,17 | -0,35  | -0,58  | exon-7 / NM_001098742   | 14 | 37506030..37506080 |
| si:ch73-18j6.1    | <b>mut+</b> | 30,06 | -0,70 | -0,24  | 0,10   | exon-2 / NM_001099986   | 20 | 14490188..14490245 |
| si:dkey-110c1.7   | <b>mut+</b> | 1,42  | -1,43 | -0,70  | -1,28  | exon-34 / NM_001045165  | 22 | 20221619..20221648 |

## S3\_sk1E

|                         |             |       |       |       |        |                         |    |                    |
|-------------------------|-------------|-------|-------|-------|--------|-------------------------|----|--------------------|
| <b>si:dkey-204a24.7</b> | <b>mut+</b> | 0,84  | -1,41 | -1,29 | -1,85  | exon-6a / NM_001083066  | 19 | 5453771..5453815   |
| si:dkey-42i9.6          | <b>mut+</b> | 31,19 | -0,21 | -0,15 | -0,13  | exon-3 / NM_001044870   | 22 | 8172798..8172925   |
| si:xx-bac7cse.2         | <b>mut+</b> | 30,54 | -0,21 | -0,24 | -0,64  | exon-5 / NM_001089348   | 10 | 6342538..6342633   |
| slit2                   | <b>mut+</b> | 30,32 | -0,12 | -0,38 | -0,35  | exon-22 / NM_131735     | 1  | 20703370..20703441 |
| smarcb1b                | <b>mut+</b> | 1,50  | -0,68 | -0,89 | -0,88  | exon-8 / NM_131448      | 21 | 7847138..7847149   |
| spna2                   | <b>mut+</b> | 0,43  | -0,53 | -0,69 | -0,65  | exon-36 / NM_001098488  | 21 | 5224240..5224254   |
| spna2                   | <b>mut+</b> | 1,05  | -0,94 | -1,44 | -0,66  | exon-22 / NM_001098488  | 21 | 5212162..5212221   |
| srp14                   | <b>mut+</b> | 30,54 | -0,15 | -0,36 | -0,33  | exon-4 / NM_001033741   | 17 | 3322844..3322876   |
| stm                     | <b>mut+</b> | 2,61  | -0,61 | -0,59 | -0,54  | exon-20 / NM_198817     | 19 | 769580..769621     |
| supt5h                  | <b>mut+</b> | 3,97  | -0,25 | -0,13 | -0,28  | exon-29 / NM_131673     | 15 | 18027919..18028014 |
| tardbp1                 | <b>mut+</b> | 0,39  | -0,57 | -2,07 | -0,82  | exon-6a / NM_198364     | 23 | 25345338..25345609 |
| tbx1                    | <b>mut+</b> | 2,50  | -0,66 | -0,68 | -0,08  | exon-6 / NM_183339      | 7  | 23098926..23099026 |
| thyn1                   | <b>mut+</b> | 2,54  | -1,16 | -1,55 | -30,78 | exon-5 / NM_200657      | 15 | 16655154..16655249 |
| tmem48                  | <b>mut+</b> | 30,06 | -0,70 | -1,20 | -0,82  | exon-14 / NM_199943     | 2  | 22231586..22231636 |
| tnfsf10l                | <b>mut+</b> | 29,73 | -0,46 | -1,67 | -1,37  | exon-4 / NM_131843      | 7  | 13541005..13541097 |
| tomm34                  | <b>mut+</b> | 27,73 | -0,57 | -0,95 | -1,23  | exon-3 / NM_199638      | 6  | 53320674..53320773 |
| <b>u2af2b</b>           | <b>mut+</b> | 0,83  | -0,43 | -0,51 | -0,91  | exon-4 / NM_205689      | 19 | 7990248..7990283   |
| uba3                    | <b>mut+</b> | 30,73 | -0,87 | -0,75 | -0,86  | exon-12 / NM_213467     | 11 | 14571466..14571519 |
| ubl3                    | <b>mut+</b> | 27,73 | -0,33 | -1,06 | -0,79  | exon-3 / NM_212856      | 14 | 27828508..27828616 |
| usp14                   | <b>mut+</b> | 30,06 | -0,06 | -0,83 | -0,21  | exon-3 / NM_199973      | 18 | 39381503..39381535 |
| usp9                    | <b>mut+</b> | 0,81  | -0,54 | -0,61 | -0,61  | exon-43a / NM_001077449 | 9  | 27282328..27282435 |
| wu:fe11e12              | <b>mut+</b> | 30,06 | -0,41 | -1,64 | -1,11  | exon-16 / NM_001024951  | 6  | 1323629..1323718   |
| <b>xrn2</b>             | <b>mut+</b> | 30,32 | -1,09 | -0,68 | -1,15  | exon-30 / NM_001001944  | 20 | 48224884..48224923 |
| zgc:100909              | <b>mut+</b> | 1,42  | -1,09 | -1,43 | -1,75  | exon-2 / NM_001003752   | 11 | 4963407..4963465   |
| zgc:101555              | <b>mut+</b> | 31,73 | -0,34 | -0,38 | -0,28  | exon-4 / NM_001006000   | 18 | 12256360..12256458 |
| zgc:101896              | <b>mut+</b> | 3,24  | -0,99 | -0,77 | -0,60  | exon-2 / NM_001007373   | 4  | 24124558..24124680 |
| zgc:103421              | <b>mut+</b> | 29,73 | -0,63 | -0,72 | -0,68  | exon-9 / NM_001006042   | 1  | 10136324..10136377 |
| zgc:103433              | <b>mut+</b> | 3,68  | -0,53 | -0,54 | -0,23  | exon-2 / NM_001006038   | 14 | 51529002..51529049 |
| <b>zgc:103442</b>       | <b>mut+</b> | 1,49  | -0,17 | -0,27 | -0,21  | exon-10 / NM_001083855  | 8  | 16076834..16076881 |
| zgc:103670              | <b>mut+</b> | 31,06 | -0,71 | -0,99 | -0,41  | exon-2 / NM_001004664   | 8  | 9546986..9547080   |
| zgc:110113              | <b>mut+</b> | 3,87  | -1,01 | -0,90 | -1,17  | exon-5 / NM_001017574   | 9  | 3514022..3514099   |
| zgc:110158              | <b>mut+</b> | 30,06 | -0,34 | -0,08 | -0,10  | exon-8 / NM_001020567   | 2  | 51196762..51196797 |
| zgc:110179              | <b>mut+</b> | 29,73 | -2,05 | -2,67 | -2,21  | exon-2 / NM_001017840   | 7  | 50570174..50570230 |
| zgc:110289              | <b>mut+</b> | 30,54 | -1,08 | -0,42 | -0,06  | exon-4 / NM_001017600   | 22 | 34727089..34727172 |
| zgc:110796              | <b>mut+</b> | 27,73 | -0,09 | -0,78 | -0,53  | exon-2 / NM_001013333   | 13 | 47961333..47961373 |



## S3\_sk1E

|                   |             |       |       |        |        |                        |    |                    |
|-------------------|-------------|-------|-------|--------|--------|------------------------|----|--------------------|
| zgc:112064        | <i>mut+</i> | 29,73 | -1,20 | -0,99  | -2,05  | exon-7 / NM_001017651  | 15 | 21361866..21361895 |
| <b>zgc:112089</b> | <i>mut+</i> | 3,94  | -0,57 | 0,11   | -0,54  | exon-2 / NM_001020761  | 9  | 15174736..15174795 |
| zgc:112178        | <i>mut+</i> | 0,41  | -2,75 | -30,15 | -30,56 | exon-8a / NM_001017718 | 12 | 18627465..18627491 |
| zgc:113056        | <i>mut+</i> | 0,68  | -2,12 | -28,47 | -1,73  | exon-2 / NM_001014355  | 12 | 30769566..30769661 |
| zgc:113369        | <i>mut+</i> | 31,43 | -0,13 | -0,90  | 0,14   | exon-4 / NM_001030064  | 13 | 49952736..49952790 |
| zgc:114185        | <i>mut+</i> | 31,43 | -0,80 | -1,00  | -0,48  | exon-2 / NM_001025178  | 5  | 61899363..61899416 |
| zgc:123178        | <i>mut+</i> | 3,15  | -0,39 | -0,43  | -0,39  | exon-3 / NM_001079946  | 15 | 9631543..9631609   |
| <b>zgc:123214</b> | <i>mut+</i> | 0,37  | -0,58 | -0,52  | -0,82  | exon-2 / NM_001039990  | 16 | 6309633..6309694   |
| zgc:123246        | <i>mut+</i> | 1,34  | -0,63 | -1,15  | -2,98  | exon-5 / NM_001037694  | 1  | 55889735..55889767 |
| zgc:136503        | <i>mut+</i> | 30,06 | -0,93 | -0,65  | -1,61  | exon-3 / NM_001045293  | 24 | 16329583..16329685 |
| <b>zgc:136560</b> | <i>mut+</i> | 1,01  | -0,72 | -0,55  | -0,78  | exon-3a / NM_001045297 | 6  | 9002422..9002439   |
| <b>zgc:136591</b> | <i>mut+</i> | 4,59  | -0,36 | -0,61  | 0,15   | exon-3 / NM_001045335  | 24 | 25141618..25141739 |
| zgc:136875        | <i>mut+</i> | 30,06 | -0,52 | -0,36  | -0,32  | exon-11 / NM_001040249 | 10 | 28925858..28925937 |
| zgc:152902        | <i>mut+</i> | 30,06 | -0,82 | -0,26  | -0,37  | exon-5 / NM_001079951  | 25 | 12806814..12806882 |
| zgc:153153        | <i>mut+</i> | 27,73 | -1,27 | -2,43  | -2,07  | exon-11 / NM_001077166 | 21 | 11116786..11116819 |
| zgc:153867        | <i>mut+</i> | 0,28  | -0,44 | -0,77  | -1,29  | exon-5a / NM_213638    | 23 | 26322537..26322579 |
| zgc:153966        | <i>mut+</i> | 30,32 | -0,44 | -0,56  | -0,44  | exon-2 / NM_001045846  | 16 | 50156701..50156769 |
| zgc:153999        | <i>mut+</i> | 27,73 | -0,53 | -0,99  | -1,82  | exon-20 / NM_001077343 | 9  | 40562042..40562111 |
| zgc:154027        | <i>mut+</i> | 1,06  | -0,43 | -0,30  | -0,10  | exon-1a / NM_001076724 | 7  | 63219090..63219122 |
| zgc:158274        | <i>mut+</i> | 0,43  | -1,80 | -1,89  | -2,74  | exon-6 / NM_001082993  | 11 | 44221357..44221401 |
| zgc:158363        | <i>mut+</i> | 2,50  | -0,17 | -0,23  | -0,19  | exon-8 / NM_001079973  | 15 | 1247289..1247323   |
| zgc:158673        | <i>mut+</i> | 0,35  | -1,94 | -30,85 | -1,66  | exon-13 / NM_001080598 | 14 | 39658268..39658366 |
| zgc:162329        | <i>mut+</i> | 27,73 | -0,15 | -1,21  | -0,78  | exon-3 / NM_001110479  | 25 | 28315649..28315835 |
| zgc:162623        | <i>mut+</i> | 27,73 | -1,19 | -30,35 | -2,51  | exon-2 / NM_001089548  | 23 | 18679620..18679686 |
| zgc:171542        | <i>mut+</i> | 3,46  | -0,83 | -0,79  | -0,71  | exon-5 / NM_001123057  | 9  | 41295083..41295187 |
| zgc:171549        | <i>mut+</i> | 30,90 | -0,31 | -0,20  | -0,29  | exon-3 / NM_001127470  | 7  | 46011536..46011587 |
| zgc:193686        | <i>mut+</i> | 27,73 | -0,43 | -1,49  | -1,14  | exon-3 / NM_001130587  | 1  | 21998304..21998342 |
| zgc:194210        | <i>mut+</i> | 28,73 | -1,64 | -0,66  | -0,66  | exon-3 / NM_001130609  | 16 | 28082417..28082449 |
| zgc:55327         | <i>mut+</i> | 31,43 | -0,60 | 0,04   | -0,40  | exon-10 / NM_200946    | 20 | 55050486..55050566 |
| zgc:55343         | <i>mut+</i> | 27,73 | -1,63 | -1,62  | -1,18  | exon-9 / NM_200252     | 4  | 42102734..42102872 |
| zgc:56576         | <i>mut+</i> | 4,11  | -0,74 | -1,05  | -1,47  | exon-7 / NM_200270     | 17 | 14173561..14173609 |
| zgc:63783         | <i>mut+</i> | 30,32 | -0,34 | -0,78  | -0,92  | exon-9 / NM_213451     | 2  | 4486090..4486179   |
| zgc:63812         | <i>mut+</i> | 27,73 | -1,54 | -0,92  | -2,20  | exon-2 / NM_201109     | 15 | 29093283..29093323 |
| zgc:66472         | <i>mut+</i> | 30,90 | -0,20 | -0,32  | -1,27  | exon-2 / NM_199812     | 1  | 42919374..42919425 |
| zgc:73369         | <i>mut+</i> | 2,53  | -0,43 | -0,18  | -0,22  | exon-4 / NM_200807     | 24 | 13469389..13469448 |

## S3\_sk1E

|                  |             |        |       |       |       |                         |    |                    |
|------------------|-------------|--------|-------|-------|-------|-------------------------|----|--------------------|
| zgc:77407        | <i>mut+</i> | 27,73  | -0,71 | -0,88 | -0,64 | exon-23 / NM_213266     | 3  | 50356402..50356453 |
| <b>zgc:77898</b> | <i>mut+</i> | 0,73   | -1,58 | -1,14 | -1,34 | exon-1a / NM_213246     | 8  | 8615974..8616046   |
| zgc:86751        | <i>mut+</i> | 32,26  | -0,39 | -0,20 | -0,30 | exon-6 / NM_001002137   | 23 | 1501232..1501256   |
| zgc:86902        | <i>mut+</i> | 4,65   | -0,46 | -0,54 | -0,23 | exon-3 / NM_001002677   | 9  | 9590261..9590332   |
| zgc:91802        | <i>mut+</i> | 0,27   | -2,35 | -2,64 | -3,64 | exon-4a / NM_001005584  | 23 | 32852506..32852529 |
| zgc:92169        | <i>mut+</i> | 31,06  | -0,33 | -0,33 | -0,17 | exon-4 / NM_001004553   | 1  | 48822891..48822950 |
| zgc:92317        | <i>mut+</i> | 28,73  | -1,53 | -1,16 | -1,09 | exon-4 / NM_001005587   | 5  | 27739648..27739701 |
| zgc:92575        | <i>mut+</i> | 0,82   | -1,60 | -0,96 | -1,96 | exon-1a / NM_001007327  | 1  | 43524117..43524201 |
| <b>zgc:92615</b> | <i>mut+</i> | 33,46  | -0,82 | -0,83 | -1,10 | exon-5 / NM_001002703   | 5  | 6099613..6099677   |
| zgc:92715        | <i>mut+</i> | 30,90  | -0,82 | -1,26 | -1,41 | exon-2 / NM_001002590   | 11 | 43465549..43465604 |
| zgc:92723        | <i>mut+</i> | 0,61   | -1,15 | -0,71 | -0,52 | exon-4 / NM_001002583   | 9  | 17102308..17102357 |
| zgc:92726        | <i>mut+</i> | 30,90  | -0,24 | 0,02  | -0,33 | exon-2 / NM_001003427   | 25 | 32407324..32407368 |
| tbc1d23          | <i>wt+</i>  | -2,69  | 0,25  | 0,34  | -0,09 | exon-14a / NM_200487    | 6  | 20290331..20290375 |
| trpm7            | <i>wt+</i>  | -31,20 | 1,17  | 0,89  | 0,02  | exon-19a / NM_001030061 | 18 | 43585466..43585513 |
| zgc:194486       | <i>wt+</i>  | -1,92  | 0,40  | 0,08  | 0,14  | exon-3 / NM_001089421   | 12 | 25283014..25283046 |
| vcl              | <i>wt+</i>  | -1,04  | 0,41  | 1,65  | 0,42  | exon-19 / NM_001128681  | 13 | 23881076..23881267 |
| zgc:92380        | <i>wt+</i>  | -1,45  | 0,89  | 0,76  | 0,66  | exon-6a / NM_001003480  | 9  | 41149915..41149949 |
| rab11fip4a       | <i>wt+</i>  | -26,44 | 0,15  | 1,22  | 0,66  | exon-11 / NM_001002533  | 3  | 33800226..33800307 |
| wdr82            | <i>wt+</i>  | -2,47  | 0,22  | 1,00  | 0,91  | exon-4a / NM_199551     | 6  | 28345398..28345412 |
| amt2             | <i>wt+</i>  | -1,12  | 2,33  | 2,52  | 1,20  | exon-4 / NM_131674      | 7  | 5907511..5907555   |
| zgc:154102       | <i>wt+</i>  | -1,02  | 1,13  | 1,31  | 1,29  | exon-2a / NM_001076615  | 2  | 16995887..16995919 |
| fras1            | <i>wt+</i>  | -0,82  | 1,70  | 1,99  | 1,73  | exon-33 / NM_001130840  | 5  | 29390584..29390616 |
| zgc:91853        | <i>wt+</i>  | -0,29  | 2,30  | 2,90  | 2,42  | exon-6a / NM_001002196  | 16 | 32644888..32644902 |
| add1             | <i>wt+</i>  | -0,45  | 2,90  | 30,06 | 2,51  | exon-12a / NM_001079958 | 21 | 134765..134782     |

## Legend

|                   |                                                   |
|-------------------|---------------------------------------------------|
| gene_id           | gene symbol (zV7/danRer5 annotation database)     |
| AS                | alternative splicing mode:                        |
|                   | <i>mut+</i> : increased exon-skipping in mut      |
|                   | <i>wt+</i> : increased exon-skipping in wt        |
| <i>skip</i>       | value of exon-skipping information                |
| <i>incl 1/2/3</i> | value of exon-inclusion information               |
| alt.exon / refSeq | alternative exon number / refSeq mRNA             |
| chr               | chromosome name (zV7/danRer5)                     |
| position_alt.exon | chromosome position of alternative exon (0-based) |

S4\_sk2E

**Supplementary Table S4. List of multiple-exon skipping targets**

Targets selected and positively validated by RT-PCR are in red/bold under gene\_id

| gene_id           | AS          | skip  | incl_1a | incl_1b | incl_2 | incl_3 | incl_4 | alt.exon / refSeq        | chr | position_alt.exon                     |
|-------------------|-------------|-------|---------|---------|--------|--------|--------|--------------------------|-----|---------------------------------------|
| cmn               | <b>mut+</b> | 1,68  | -0,23   | 0,08    | -0,64  | -0,04  | -0,08  | exon-33a,b / NM_131014   | 12  | 16550715..16550762;16550525..16550600 |
| <b>tpd5212</b>    | <b>mut+</b> | 1,21  | -1,09   | -0,58   | -0,91  | -0,91  | -0,43  | exon-5a,b / NM_199582    | 23  | 15234117..15234143;15233779..15233820 |
| si:dkey-235d18.4  | <b>mut+</b> | 0,37  | -0,62   | -0,83   | -0,56  | -1,05  | -0,61  | exon-1a,b / NM_00103014  | 20  | 51896051..51896094;51899955..51900794 |
| tnnt3b            | <b>mut+</b> | 0,85  | -0,22   | -0,55   | -0,22  | -0,83  | -0,70  | exon-4a,b / NM_00111041  | 7   | 39263550..39263567;39263275..39263291 |
| elavl1            | <b>mut+</b> | 0,35  | -1,63   | -0,94   | -30,57 | -29,68 | -0,78  | exon-1a,b / NM_131452    | 2   | 35668187..35668199;35668341..35668400 |
| <b>sh3glb2</b>    | <b>mut+</b> | 1,34  | -0,68   | -0,63   | -1,17  | -0,38  | -0,89  | exon-5a,b / NM_201119    | 5   | 23437479..23437541;23434269..23434291 |
| <b>sulf1</b>      | <b>mut+</b> | 0,99  | -1,04   | -2,29   | -0,88  | -2,79  | -1,01  | exon-18a,b / NM_00100384 | 24  | 12115708..12115741;12117716..12117768 |
| <b>zgc:77795</b>  | <b>mut+</b> | 0,20  | -1,48   | -1,10   | -2,66  | -2,58  | -1,13  | exon-5a,b / NM_212731    | 8   | 21631078..21631101;21631607..21631651 |
| <b>zgc:158450</b> | <b>mut+</b> | 0,46  | -0,87   | -1,31   | -0,98  | -2,10  | -1,21  | exon-5a,b / NM_00108020  | 2   | 12535736..12535768;12536740..12536761 |
| rbm39b            | <b>wt+</b>  | -0,62 | 3,11    | 1,33    | 2,05   | 30,9   | 1,51   | exon-3a,b / NM_00101437  | 8   | 35306253..35306328;35304476..35304621 |

**Legend**

|                   |                                                   |
|-------------------|---------------------------------------------------|
| gene_id           | gene symbol (zV7/danRer5 annotation database)     |
| AS                | alternative splicing mode:                        |
|                   | <b>mut+</b> : increased exon-skipping in mut      |
|                   | <b>wt+</b> : increased exon-skipping in wt        |
| skip              | value of exon-skipping information                |
| incl_1a/1b/2/3/4  | value of exon-inclusion information               |
| alt.exon / refSeq | alternative exon number / refSeq mRNA             |
| chr               | chromosome name (zV7/danRer5)                     |
| position_alt.exon | chromosome position of alternative exon (0-based) |

## S5\_intronR

## Supplementary Table S5. List of intron-retention targets

Targets selected and positively validated by RT-PCR are in red/bold under gene\_id (in blue: target that was not positively validated)

| gene_id                  | AS          | retained | spliced | target_intron / refseq   | chr | position_target_intron |
|--------------------------|-------------|----------|---------|--------------------------|-----|------------------------|
| <b>a2bp1</b>             | <b>mut+</b> | 2,53     | -0,92   | intron-4 / NM_001005596  | 3   | 25621946..25622827     |
| blcap                    | <b>mut+</b> | 0,79     | -2,88   | intron-2 / NM_131493     | 6   | 52858533..52858541     |
| brd2a                    | <b>mut+</b> | 1,54     | -1,81   | intron-12 / NM_131200    | 19  | 4851942..4851953       |
| c2cd2l                   | <b>mut+</b> | 3,83     | -1,54   | intron-6 / NM_001077383  | 5   | 22331266..22331452     |
| ccnf                     | <b>mut+</b> | 0,62     | -1,46   | intron-14 / NM_207048    | 3   | 3947355..3947437       |
| <b>ccnt2</b>             | <b>mut+</b> | 0,57     | -1,18   | intron-9 / NM_199828     | 9   | 16584736..16584830     |
| cry2a                    | <b>mut+</b> | 1,54     | -0,73   | intron-7 / NM_131791     | 8   | 19015937..19016881     |
| <b>eif4a1b</b>           | <b>mut+</b> | 1,88     | -0,20   | intron-1 / NM_201510     | 5   | 13761737..13762342     |
| hes6                     | <b>mut+</b> | 3,02     | -1,48   | intron-2 / NM_194400     | 2   | 43100252..43100353     |
| <b>jph1b</b>             | <b>mut+</b> | 0,77     | -1,79   | intron-5 / NM_001044348  | 2   | 24724858..24726540     |
| mdm2                     | <b>mut+</b> | 2,53     | -0,58   | intron-2 / NM_131364     | 4   | 27590062..27591517     |
| mdm2                     | <b>mut+</b> | 3,88     | -0,77   | intron-8 / NM_131364     | 4   | 27586080..27586189     |
| ndufa4                   | <b>mut+</b> | 2,71     | -0,63   | intron-2 / NM_213025     | 12  | 8100236..8100304       |
| oclnb                    | <b>mut+</b> | 1,18     | -30,16  | intron-3 / NM_001008618  | 5   | 19333887..19333907     |
| papolg                   | <b>mut+</b> | 0,56     | -1,63   | intron-15 / NM_200621    | 13  | 23246601..23246671     |
| <b>pl10</b>              | <b>mut+</b> | 2,43     | -0,58   | intron-1 / NM_130941     | 6   | 59005302..59006145     |
| ptcd3                    | <b>mut+</b> | 3,24     | -0,61   | intron-16 / NM_001037372 | 14  | 12053643..12053731     |
| <b>rfx4</b>              | <b>mut+</b> | 3,62     | -1,33   | intron-4 / NM_205712     | 18  | 18942435..18943234     |
| <b>rpl38</b>             | <b>mut+</b> | 1,68     | -0,44   | intron-1 / NM_001002486  | 12  | 35914090..35914270     |
| slc25a22                 | <b>mut+</b> | 0,60     | -0,89   | intron-10 / NM_213408    | 6   | 35867519..35867527     |
| ubxn1                    | <b>mut+</b> | 8,16     | -0,46   | intron-2 / NM_212607     | 14  | 51213220..51213292     |
| <b>zgc:101644</b>        | <b>mut+</b> | 1,14     | -1,58   | intron-1 / NM_001008643  | 9   | 17725809..17726036     |
| zgc:110796               | <b>mut+</b> | 4,15     | -0,78   | intron-1 / NM_001013333  | 13  | 47961374..47961871     |
| zgc:114129               | <b>mut+</b> | 0,97     | -0,91   | intron-9 / NM_001030102  | 17  | 10434724..10434815     |
| zgc:136497               | <b>mut+</b> | 1,84     | -0,97   | intron-1 / NM_001040322  | 13  | 5707372..5707480       |
| zgc:158284               | <b>mut+</b> | 0,87     | -2,50   | intron-1 / NM_001123045  | 14  | 53926535..53926547     |
| zgc:158316               | <b>mut+</b> | 2,12     | -1,00   | intron-6 / NM_001080074  | 9   | 37220..37477           |
| zgc:158803               | <b>mut+</b> | 0,52     | -0,66   | intron-11 / NM_001089547 | 1   | 51678799..51678808     |
| <b>zgc:56141</b>         | <b>mut+</b> | 1,61     | -0,44   | intron-3 / NM_213317     | 7   | 13413366..13413729     |
| zgc:63783                | <b>mut+</b> | 2,37     | -0,74   | intron-7 / NM_213451     | 2   | 4485435..4485734       |
| <b>zgc:66168(rps27a)</b> | <b>mut+</b> | 0,74     | -0,35   | intron-1 / NM_200502     | 6   | 4856580..4856681       |

## S5\_intronR

|            |             |       |       |                          |    |                    |
|------------|-------------|-------|-------|--------------------------|----|--------------------|
| zgc:77517  | <b>mut+</b> | 1,08  | -0,48 | intron-6 / NM_200568     | 6  | 26340887..26340963 |
| arrdc3     | <b>wt+</b>  | -2,18 | 1,06  | intron-2 / NM_001080029  | 5  | 47559842..47559934 |
| dnmt7      | <b>wt+</b>  | -0,54 | 3,88  | intron-24 / NM_001020476 | 8  | 21805099..21805149 |
| fga        | <b>wt+</b>  | -0,97 | 1,34  | intron-5 / NM_001002039  | 1  | 6720269..6720488   |
| sardh      | <b>wt+</b>  | -1,16 | 1,60  | intron-16 / NM_201128    | 10 | 7499655..7500180   |
| sfrs1      | <b>wt+</b>  | -0,84 | 0,60  | intron-2 / NM_200593     | 21 | 31401902..31402226 |
| sfrs18     | <b>wt+</b>  | -0,95 | 1,14  | intron-11 / NM_001083837 | 16 | 39017464..39017760 |
| sfrs2      | <b>wt+</b>  | -0,90 | 0,62  | intron-2 / NM_213382     | 12 | 29337713..29338943 |
| trspap1    | <b>wt+</b>  | -1,22 | 0,75  | intron-3 / NM_001029966  | 2  | 19874145..19874586 |
| zgc:113564 | <b>wt+</b>  | -1,15 | 1,15  | intron-3 / NM_001013315  | 5  | 20944901..20946580 |
| zgc:113564 | <b>wt+</b>  | -0,59 | 0,71  | intron-7 / NM_001013315  | 5  | 20948368..20948627 |
| zgc:65779  | <b>wt+</b>  | -1,39 | 2,17  | intron-8 / NM_214750     | 5  | 68371673..68371688 |
| zgc:91951  | <b>wt+</b>  | -0,58 | 1,42  | intron-5 / NM_001007764  | 1  | 22969322..22969341 |

## Legend

|                        |                                                 |
|------------------------|-------------------------------------------------|
| gene_id                | gene symbol (zV7/danRer5 annotation database)   |
| AS                     | alternative splicing mode:                      |
|                        | <b>mut+</b> : increased intron-retention in mut |
|                        | <b>wt+</b> : increased intron-retention in wt   |
| <b>retained</b>        | value of intron-retained information            |
| <b>spliced</b>         | value of intron-spliced information             |
| target_intron / refSeq | target intron number / refSeq mRNA              |
| chr                    | chromosome name (zV7/danRer5)                   |
| position_target_intron | chromosome position of target intron (0-based)  |

## S6\_altSS

## Supplementary Table S6. List of targets with alternative 5' or 3' splice sites

Targets selected and positively validated by RT-PCR are in red/bold under gene\_id

| gene_id                   | AS                   | distal | proximal_1 | proximal_2 | target_exon / refsec   | chr | position_distal_5'(3)SS | position_proximal_5'(3)SS |
|---------------------------|----------------------|--------|------------|------------|------------------------|-----|-------------------------|---------------------------|
| <b>bcl7a</b>              | 5'SS / distal_mut+   | 0,98   | -0,53      | -0,75      | exon-4 / NM_212560     | 5   | 38526324(0)             | 38526306(+18)             |
| <b>brd2a</b>              | 5'SS / distal_mut+   | 0,38   | -0,88      | -0,53      | exon-3 / NM_131200     | 19  | 4846305(-12)            | 4846317(0)                |
| <b>her8a</b>              | 5'SS / distal_mut+   | 0,62   | -1,12      | -1,59      | exon-3 / NM_199624     | 7   | 17415059(-12)           | 17415047(0)               |
| <b>ilif3</b>              | 5'SS / distal_mut+   | 1,08   | -0,47      | -0,71      | exon-15 / NM_212595    | 3   | 4738803(-30)            | 4738833(0)                |
| <b>isoc1</b>              | 5'SS / distal_mut+   | 2,76   | -0,94      | -0,40      | exon-1 / NM_001079981  | 10  | 6497149(-77)            | 6497072(0)                |
| <b>pl10</b>               | 5'SS / distal_mut+   | 0,51   | -0,71      | -1,09      | exon-4 / NM_130941     | 6   | 59009792(0)             | 59009840(+48)             |
| <b>popdc2</b>             | 5'SS / distal_mut+   | 1,87   | -0,71      | -0,45      | exon-3 / NM_001114450  | 9   | 14576647(0)             | 14576504(+143)            |
| <b>pou2f1b</b>            | 5'SS / distal_mut+   | 0,94   | -1,50      | -1,97      | exon-12 / NM_001089325 | 9   | 28420890(0)             | 28420902(+12)             |
| <b>tcf12</b>              | 5'SS / distal_mut+   | 0,71   | -0,65      | -0,72      | exon-6 / NM_214816     | 7   | 49306883(-39)           | 49306922(0)               |
| <b>zgc:101828</b>         | 5'SS / distal_mut+   | 2,02   | -0,48      | -0,65      | exon-1 / NM_001005971  | 2   | 51090266(-38)           | 51090304(0)               |
| <b>zgc:110753</b>         | 5'SS / distal_mut+   | 0,61   | -0,60      | -0,53      | exon-1 / NM_001013293  | 19  | 38301871(-78)           | 38301793(0)               |
| <b>aup1</b>               | 5'SS / proximal_mut+ | -2,09  | 1,25       | 1,65       | exon-8 / NM_199690     | 14  | 1714087(0)              | 1714105(+18)              |
| <b>btf3</b>               | 5'SS / proximal_mut+ | -0,39  | 1,55       | 1,27       | exon-1 / NM_001076555  | 5   | 25494886(-63)           | 25494949(0)               |
| <b>c20orf1491</b>         | 5'SS / proximal_mut+ | -0,10  | 1,97       | 3,89       | exon-1 / NM_200008     | 23  | 15228392(0)             | 15228381(+11)             |
| <b>cbx3a</b>              | 5'SS / proximal_mut+ | -0,95  | 0,47       | 0,14       | exon-1 / NM_001045402  | 19  | 46027166(0)             | 46027046(+120)            |
| <b>clasp2</b>             | 5'SS / proximal_mut+ | -0,57  | 1,21       | 1,36       | exon-29 / NM_207072    | 19  | 39681558(0)             | 39681576(+18)             |
| <b>dnajc7</b>             | 5'SS / proximal_mut+ | -0,93  | 0,66       | 0,53       | exon-13 / NM_213290    | 3   | 14913135(0)             | 14913117(+18)             |
| <b>dync1li1</b>           | 5'SS / proximal_mut+ | -1,31  | 0,96       | 1,01       | exon-11 / NM_001102428 | 19  | 9845344(-30)            | 9845314(0)                |
| <b>foxp2</b>              | 5'SS / proximal_mut+ | -0,96  | 0,74       | 1,09       | exon-18 / NM_001030082 | 4   | 40364906(-18)           | 40364924(0)               |
| <b>hgs</b>                | 5'SS / proximal_mut+ | -0,59  | 0,92       | 0,75       | exon-9 / NM_199868     | 3   | 57924489(0)             | 57924507(+18)             |
| <b>htt</b>                | 5'SS / proximal_mut+ | -1,00  | 1,38       | 0,36       | exon-63 / NM_131018    | 1   | 39236344(-18)           | 39236326(0)               |
| <b>ldb1a</b>              | 5'SS / proximal_mut+ | -1,08  | 0,78       | 0,64       | exon-1 / NM_131316     | 13  | 20333670(0)             | 20333631(+39)             |
| <b>magi1</b>              | 5'SS / proximal_mut+ | -1,31  | 1,74       | 1,44       | exon-9 / NM_001007063  | 11  | 16802963(0)             | 16802945(+18)             |
| <b>nrf1</b>               | 5'SS / proximal_mut+ | -0,16  | 0,77       | 1,30       | exon-9 / NM_131680     | 4   | 15539005(0)             | 15538975(+30)             |
| <b>otpa</b>               | 5'SS / proximal_mut+ | -0,33  | 0,91       | 0,88       | exon-1 / NM_001128703  | 24  | 28613482(-39)           | 28613521(0)               |
| <b>pabpc1a</b>            | 5'SS / proximal_mut+ | -0,09  | 1,08       | 1,45       | exon-15 / NM_001031676 | 16  | 48346182(-21)           | 48346161(0)               |
| <b>si:ch211-13c6.3</b>    | 5'SS / proximal_mut+ | -0,92  | 0,70       | 0,74       | exon-2 / NM_001045167  | 19  | 38858843(-15)           | 38858858(0)               |
| <b>si:ch211-214j24.10</b> | 5'SS / proximal_mut+ | -0,47  | 2,43       | 31,32      | exon-1 / NM_001025503  | 4   | 3952109(0)              | 3952133(+24)              |
| <b>slc1a2</b>             | 5'SS / proximal_mut+ | -0,16  | 0,48       | 0,59       | exon-8 / NM_199978     | 25  | 29371187(-46)           | 29371233(0)               |
| <b>slc4a4</b>             | 5'SS / proximal_mut+ | -0,53  | 0,76       | 1,05       | exon-6 / NM_001034984  | 5   | 34439349(-27)           | 34439376(0)               |
| <b>stau2</b>              | 5'SS / proximal_mut+ | -0,05  | 1,54       | 2,49       | exon-14 / NM_200925    | 24  | 16565402(0)             | 16565420(+18)             |
| <b>stk25</b>              | 5'SS / proximal_mut+ | -0,01  | 1,14       | 2,05       | exon-7 / NM_213308     | 2   | 18171355(0)             | 18171337(+18)             |
| <b>yars</b>               | 5'SS / proximal_mut+ | -0,21  | 0,56       | 1,82       | exon-1 / NM_201316     | 19  | 28047810(0)             | 28047798(+12)             |
| <b>ywhae1</b>             | 5'SS / proximal_mut+ | -0,13  | 1,38       | 3,86       | exon-1 / NM_212605     | 15  | 21443887(0)             | 21443870(+17)             |
| <b>zgc:112066</b>         | 5'SS / proximal_mut+ | -2,97  | 2,53       | 1,68       | exon-3 / NM_001017649  | 10  | 20236356(0)             | 20236332(+24)             |
| <b>zgc:112221</b>         | 5'SS / proximal_mut+ | -0,96  | 1,47       | 1,68       | exon-5 / NM_001020763  | 5   | 19459983(-21)           | 19460004(0)               |
| <b>zgc:123105</b>         | 5'SS / proximal_mut+ | -0,96  | 0,70       | 0,79       | exon-8 / NM_001039994  | 21  | 25176145(-21)           | 25176124(0)               |
| <b>zgc:136497</b>         | 5'SS / proximal_mut+ | -3,22  | 1,15       | 0,48       | exon-4 / NM_001040322  | 13  | 5709589(-39)            | 5709628(0)                |
| <b>zgc:152873</b>         | 5'SS / proximal_mut+ | -1,05  | 1,18       | 0,80       | exon-7 / NM_001077560  | 15  | 20836676(-89)           | 20836765(0)               |

## S6\_altSS

|                   |                      |       |       |        |                        |    |               |                |
|-------------------|----------------------|-------|-------|--------|------------------------|----|---------------|----------------|
| zgc:158161        | 5'SS / proximal_mut+ | -0.62 | 1.68  | 1.39   | exon-29 / NM_001004526 | 17 | 856242(0)     | 856287(+45)    |
| <b>zgc:162329</b> | 5'SS / proximal_mut+ | -0.64 | 1.69  | 2.17   | exon-1 / NM_001110478  | 25 | 28324403(-49) | 28324354(0)    |
| <b>zgc:77282</b>  | 5'SS / proximal_mut+ | -0.41 | 0.90  | 1.38   | exon-1 / NM_205698     | 15 | 5088592(-18)  | 5088574(0)     |
| zgc:92567         | 5'SS / proximal_mut+ | -0.78 | 1.39  | 1.76   | exon-6 / NM_001002731  | 8  | 23452347(-18) | 23452329(0)    |
| im:7162273        | 3'SS / distal_mut+   | 0.53  | -1.16 | -30.98 | exon 8/NM_001079966    | 1  | 29608935(0)   | 29609081(-146) |
| mdm4              | 3'SS / distal_mut+   | 0.09  | -0.74 | -1.02  | exon 9/NM_212732       | 11 | 18724249(0)   | 18724234(-15)  |
| si:ch211-255/12.2 | 3'SS / distal_mut+   | 1.03  | -0.57 | -2.01  | exon 5/NM_001113218    | 18 | 41517071(+10) | 41517081(0)    |
| ssb               | 3'SS / distal_mut+   | 0.12  | -4.49 | -4.57  | exon 2/NM_199547       | 6  | 1487587(+16)  | 1487603(0)     |
| zgc:109973        | 3'SS / distal_mut+   | 0.36  | -1.29 | -1.19  | exon 2/NM_001020540    | 10 | 38442953(0)   | 38442926(-27)  |
| zgc:55671         | 3'SS / distal_mut+   | 0.06  | -0.90 | -1.19  | exon 9/NM_212588       | 7  | 55484246(+39) | 55484207(0)    |
| hspg2             | 3'SS / proximal_mut+ | -0.17 | 0.82  | 0.99   | exon 11/NM_001127467   | 23 | 28072195(+27) | 28072168(0)    |
| pax2a             | 3'SS / proximal_mut+ | -0.79 | 1.35  | 0.75   | exon 5/NM_131184       | 13 | 29261023(0)   | 29261074(-51)  |
| rhogc             | 3'SS / proximal_mut+ | -2.50 | 0.88  | 0.24   | exon 2/NM_199692       | 5  | 31770009(+15) | 31769994(0)    |
| sf1               | 3'SS / proximal_mut+ | -0.96 | 0.58  | 0.79   | exon 11/NM_212653      | 7  | 13438924(0)   | 13438846(-78)  |
| ucp2              | 3'SS / proximal_mut+ | -0.64 | 0.89  | 2.89   | exon 4/NM_131176       | 10 | 34191429(0)   | 34191318(-111) |
| zgc:112214        | 3'SS / proximal_mut+ | -0.20 | 0.61  | 0.81   | exon 18/NM_001020666   | 24 | 6875862(0)    | 6875775(-87)   |

## Legend

|                            |                                                                                                 |
|----------------------------|-------------------------------------------------------------------------------------------------|
| gene_id                    | gene symbol (zV7/danRer5 annotation database)                                                   |
| AS                         | alternative splicing mode:                                                                      |
|                            | 5'SS / <b>distal_mut+</b> : increased distal 5' splice site usage <i>immut</i>                  |
|                            | 5'SS / <b>proximal_mut+</b> : increased proximal 5' splice site usage <i>immut</i>              |
|                            | 3'SS / <b>distal_mut+</b> : increased distal 3' splice site usage <i>immut</i>                  |
|                            | 3'SS / <b>proximal_mut+</b> : increased proximal 3' splice site usage <i>immut</i>              |
| <b>distal</b>              | value of distal 5' splice site usage information                                                |
| <b>proximal_1/2</b>        | value of proximal 5' splice site usage information                                              |
| target_exon / refSeq       | target exon (with alt 5'/3' splice site) number / refSeq mRNA                                   |
| chr                        | chromosome name (zV7/danRer5)                                                                   |
| position_distal_5'(3')SS   | chromosome position of 5' (3') splice site (relative to splice site of refSeq mRNA target exon) |
| position_proximal_5'(3')SS | chromosome position of 5' (3') splice site (relative to splice site of refSeq mRNA target exon) |

## S7\_mutuallyExcl

**Supplementary Table S7. List of targets with mutually exclusive exons**

Targets selected and positively validated by RT-PCR are in red/bold under gene\_id

| gene_id      | <i>up_1</i> | <i>up_2</i> | <i>up_3</i> | <i>down_1</i> | <i>down_2</i> | <i>down_3</i> | chr | position_upstream_exon             | position_downstream_exon           | refSeq    |
|--------------|-------------|-------------|-------------|---------------|---------------|---------------|-----|------------------------------------|------------------------------------|-----------|
| <b>eno1</b>  | 0.44        | 0.47        | 0.64        | -1.78         | -1.76         | -1.60         | 23  | 21063020..21063078 (Exon 3a, mut+) | 21063316..21063374 (Exon 4, wt+)   | NM_212722 |
| cpne3l       | -0.53       | -0.79       | -0.97       | 0.20          | 0.38          | 0.58          | 11  | 23621096..23621191 (Exon 8, wt+)   | 23621279..23621377 (Exon 8a, mut+) | NM_199699 |
| <b>pkm2a</b> | -0.97       | -0.31       | -0.55       | 0.20          | 1.12          | 1.56          | 18  | 343962..344128 (Exon 8a, wt+)      | 341896..342062 (Exon 9, mut+)      | NM_199333 |

**Legend**

|                                                      |                                                                                                                                    |
|------------------------------------------------------|------------------------------------------------------------------------------------------------------------------------------------|
| gene_id                                              | gene symbol (zV7/danRer5 annotation database)                                                                                      |
| <i>up_1/2/3</i>                                      | value of upstream exon inclusion information                                                                                       |
| <i>down_1/2/3</i>                                    | value of downstream exon inclusion information                                                                                     |
| chr                                                  | chromosome name (zV7/danRer5)                                                                                                      |
| position_upstream exon /<br>position_downstream exon | chromosome position of target exon; (exon number in RefSeq mRNA; increased inclusion in mut [ <b>mut+</b> ] or wt [ <b>wt+</b> ]). |
| refSeq                                               | refSeq mRNA                                                                                                                        |



**Supplementary Table S8.****List of primers used for cloning, genotyping, qRT-PCR, cRNA detection, and validation RT-PCRs.**

The primer name provides information on the target gene as well as on the location (“E” for exon and “I” for intron) and direction (forward or reverse). The numbers of the primer mixes refer to Figure S2.

| <b>application</b>                    | <b>name</b>                    | <b>sequence 5' → 3'</b>                       |
|---------------------------------------|--------------------------------|-----------------------------------------------|
| cloning of ZFU1C expression construct | ZFU1C 3'end KpnI fwd           | CTAGTCGGTACCTTATTATCGATCAGGACGCACCA TACC      |
|                                       | ZFU1C 5'end BsmBI rev          | ACTTACCGTCTCCCATGCCGAAGTTTTATTGCGATT ACTGTGAC |
| qRT-PCR analysis of ZFU1C mRNA levels | ZFU1C qPCR fwd                 | CGGATCCCTGCTACCTCATCC                         |
|                                       | ZFU1C qPCR rev                 | GACCTGGTCCTCCAGGCATC                          |
|                                       | ZF b-actin E1 fwd              | GATCTTCACTCCCCTTGTTCA                         |
|                                       | ZF b-actin E2 rev              | ATGTCTGGGTCGTCCAACAA                          |
| genotyping of zebrafish embryos       | msl4 fwd                       | GCTAGCTTGCCAAACCTACAGGT                       |
|                                       | hi1371 wt positive fwd         | CTACGGCACTTCTGTTATTTAAACACG                   |
|                                       | hi1371 rev                     | CTCACCGAATCATGTGTCAGGTATG                     |
|                                       | wnt5a fwd                      | CAGTTCTCACGTCTGCTACTTGCA                      |
|                                       | wnt5a rev                      | ACTTCCGGCGTGTGGAGAATTC                        |
| cRNA detection                        | ZFU1C cmRNA fwd                | TGCCAGCCGTTAGACCTGGTATG                       |
|                                       | ZFU1C endo. mRNA spec. rev     | CGCACATCACACACAAACCCATTAC                     |
|                                       | ZFU1C inj. cRNA spec. rev      | TCACTCAAGCGGAACGAGGTTTCC                      |
| cloning of minigene constructs        | ZFc2orf24 mini E5 fwd          | ACGTACGGTACCGAGGAGGAGGTTTTCAA                 |
|                                       | ZFc2orf24 mini iF rev          | GTTGCAAAAACAAGTAAATACTCATGAGGATG              |
|                                       | ZFc2orf24 mini iF fwd          | CTTGTTTTGCAACCAGTGTGATTTGTGTTAG               |
|                                       | ZF c2orf24 mini E7 rev         | CTAGTCCTCGAGGGTAAAGTGCTGGTATATAG              |
|                                       | ZFc2orf24 U-rich A mini iF rev | CTTTGGGGGGGGGGGGCGGGGGGGGGTATGCCGTG ACCCC     |
|                                       | ZFc2orf24 U-rich A mini iF fwd | GTCACGGCATAACCCCCCGCCCCCCCCCAAA AGATCAAGG     |
|                                       | ZFzgc112089 mini E1 fwd        | ACGTACGGTACCGTGTAGTTTACTCAGAG                 |
|                                       | ZFzgc112089 mini E2 rev        | CTAGTCCTCGAGCTTCATGAGCCCCAAAC                 |
|                                       | ZFzgc112089 mini iB C-rich rev | GGTTGGGGGCGGTGGGGCTATATTTGCAGTTTACC           |
|                                       | ZFzgc112089 mini iB C-rich fwd | TATAGCCCCACCGCCCCCAACCCACTAAACGTAAT AAC       |
|                                       | ZFilf3 mini E15 fwd            | ACGTACGGTACCGTTGAGATCGATGGACA                 |
|                                       | ZFilf3 mini E16 rev            | CTAGTCCTCGAGCTTGGTTAAATCCTCCA                 |
|                                       | ZFilf3 mini C-rich iO rev      | CAGTGGGGGCGAGCAGGAATGGGGCCTAC                 |
|                                       | ZFilf3 mini C-rich iO fwd      | GCTGCCCCACTGTCGTTGGCCTAAATATTC                |
|                                       | ZFzgc162329 mini E1 fwd        | ACGTACGAATTCGCAGAAACGAGTCCC                   |
|                                       | ZFzgc162329 mini iA rev        | TAAAGTATCAGTGCTCTTCTTAAGTGTTC AACAGG          |
|                                       | ZFzgc162329 mini iA fwd        | AGCACTGATACTTAGTACGGGATTATTATCGC              |
|                                       | ZFzgc162329 mini E2 rev        | CTACTGTCTAGACGGGTCGGGTCCTTG                   |

| primer mix |                           |                             |
|------------|---------------------------|-----------------------------|
| 1          | ZFpostn E19 fwd           | CGGTGAGGACTCTGAGGGAATC      |
|            | ZFpostn E21 rev           | CCTAATAGGCTCTGGATCATTGTGC   |
| 2          | ZFndrg3a E2 fwd           | GCAGACCAACACAAAGATGGATGAG   |
|            | ZFndrg3a E4 rev           | GGTCAAAATGACGGGACGGTTGC     |
| 3          | ZFc2orf24 E5 fwd          | TCAACGATGAATGGGGTACTGCGG    |
|            | ZFc2orf24 E7 rev          | GGGCTTCCCTCCAATTGAGGTTTC    |
| 4          | ZFabcf1 E6 fwd            | TGGCAATATATTTGCTGCACTGAGCC  |
|            | ZFabcf1 E8 rev            | GCACCTTCATCTTGCTCGTCCTC     |
| 5          | ZFnap1l4 E13 fwd          | GAAGAGGAGGAGGGTGATTTTGACC   |
|            | ZFnap1la E15 rev          | GTTGCGAGTCCACGAGGAAATTAGG   |
| 6          | ZFhsp47 E1 fwd            | GAAAACATCCAAACAGCTGTCCAAG   |
|            | ZFhsp47 E3 rev            | CCAGATTGGCGCTGGTGTCTGC      |
| 7          | ZFzgc112089 E1 fwd        | GGCAGCAGCATCAAACAGTCGTG     |
|            | ZFzgc112089 E3 rev        | CCAGTATGGCCGTCTCATCGTG      |
| 8          | ZFzgc123214 E1 fwd        | ACGCTTGGTGCCCACTATTCCG      |
|            | ZFzgc123214 E3 rev        | GAAGCTGGGCTTGGCTTTGGATG     |
| 9          | ZFzgc136591 E2 fwd        | CTGGACTGCACTCACCTGTGG       |
|            | ZFzgc136591 E4 rev        | GAAGTAGCGCAGCTCATAGCTTTCC   |
| 10         | ZFelavl4 E6 fwd           | GCCATCAAGGGTCTGAATGGACAG    |
|            | ZFelavl4 E8 rev           | ACCAGCCTGTTCTGTGTGACC       |
| 11         | ZFcbx5 E1 fwd             | GTGCAAGGAAAAAGCCGCCGCC      |
|            | ZFcbx5 E3 rev             | GTA CTCTTCCTCATCTGAGGAAGCAG |
| 12         | ZFeifc3 E21 fwd           | CCAACAGAAGCAAGGCTACCAGAG    |
|            | ZFeifc3 E22 rev           | GAGGAAGCTGCAGTCTGGTCCTG     |
| 13         | ZFzgc136560 E3 fwd        | CGAGAGATTGGCATCCTCACCAC     |
|            | ZFzgc136560 E4 rev        | GGCTGCTGTGTGTGGAGTTGTTC     |
| 14         | ZFpdha1 E1 fwd            | GCTAGCTGGGCTGGTTCTGTGAG     |
|            | ZFpdha1 E2 rev            | GTCCTGGCAGATACCACAATCCTG    |
| 15         | ZFzgc77795 E5 fwd         | GACTCTCTCTCAGGCCGGTCAG      |
|            | ZFzgc77795 E6 rev         | CATGTTCTCCACCTTGTCTCAAACG   |
| 16         | ZFsulf1 E18 fwd           | CAGACCCAGAAGCTCAGATGCAG     |
|            | ZFsulf1 E19 rev           | CAGTCATCCAGAACGGGACTGTAG    |
| 17         | ZFtdp52l2 E5 fwd          | CAGGCTGGACAGAAGACCTCAG      |
|            | ZFtdp52l2 E6 rev          | TGTCCTCAAATGACTTGAAGGTTGGAG |
| 18         | ZFsi:dkey-204a24.7 E6 fwd | GTGGAGCTGGAAGGCGAGGAG       |
|            | ZFsi:dkey-204a24.7 E7 rev | TCCATCTTCAGGTTCCAGATTGCCTG  |
| 19         | ZFprrx1b E3 fwd           | GCTGGCCAGTAAGAACGCTTCAC     |
|            | ZFprrx1b E4 rev           | ATTCATTCCCTGGGTGGAAGTGGTG   |
| 20         | ZFLOC567533 E5 fwd        | GTCATGCCAGTGATGGACGCAAG     |
|            | ZFLOC567533 E6 rev        | CATGGACATCTGCACCGTACTGC     |
| 21         | ZFdnmt E7 fwd             | AAGTGAACCTGAAGAACGATGGAGCC  |
|            | ZFdnmt E8 rev             | GTCTGGGACTCGGTGTGGAATTTG    |
| 22         | ZFzgc92615 E4 fwd         | GGGCTTTGGATCCTTCGAGACG      |
|            | ZFzgc92615 E6 rev         | CAGATGGGGAAAACCTGATGGAGCAC  |
| 23         | ZFkhdrbs1 E6 fwd          | GGAGCAGCATCCCCTCAAGG        |
|            | ZFkhdrbs1 E8 rev          | TCGTA ACTCTCTGTGCCTCTCC     |
| 24         | ZFfam76b E2 fwd           | GAATGTCCGATTGCGCATCCCATAG   |
|            | ZFfam76b E4 rev           | GGTTTGTGGAGGGCCGTA CTTC     |

|    |                            |                              |
|----|----------------------------|------------------------------|
| 25 | ZFu2af2b E3fwd             | GCAGTCGAGAACCGAAGAGAAGG      |
|    | ZFu2af2b E5 rev            | CAAAGCCTGGAGGAGGGACATC       |
| 26 | ZFcdkn1b E1 fwd            | CGTGGATGTTAACGGGAATCACGAC    |
|    | ZFcdkn1b E3 rev            | AAATCAGCCACCAGGCACTGAGG      |
| 27 | ZFxr2 E29 fwd              | CACCATGTGGGCAGAAGTGATGG      |
|    | ZFxr2 E31 rev              | GAAGAGCCCTGGTTCTGCATGG       |
| 28 | ZFsfrs6 E1 fwd             | GGGTGTACATCGGCAAGCTGAG       |
|    | ZFsfrs6 E3 rev             | ACGATCAGCCGGTACTCTGTGC       |
| 29 | ZFzgc103442 E9 fwd         | CCTGCTGGCCATGATCAACTCAG      |
|    | ZFzgc103442 E11 rev        | GCTTTCCTGGGTGCAATCCTTCC      |
| 30 | ZFbtbd10a E7 fwd           | CCAGTGCTCAGAGCGGAGAGAG       |
|    | ZFbtbd10a E9 rev           | GATAAAGGGCCGCTGGACGTAG       |
| 31 | ZFmbnl2b E4 fwd            | CACCTGCAGGCCAAGATCAAAGC      |
|    | ZFmbnl2b E5 rev            | CTGGCCAAAGCCTGTTGGTAGTG      |
| 32 | ZFsh3glb2 E5 fwd           | TTGAGAACCGACGTCTTGACCTGG     |
|    | ZFsh3glb2 E6 rev           | CTCCAGCAGGAGGCGAGTCAC        |
| 33 | ZFzgc77898 E1 fwd          | AAACCCGTCAGGAACATCGACACG     |
|    | ZFzgc77898 E2 rev          | CGTATCCTTTGCTGAAGATGTCTTTGGC |
| 34 | ZFzgc158450 E5 fwd         | ACACTGCACCACAACCCAGACAG      |
|    | ZFzgc158450 E6 rev         | ATGGGATGGCCCTGAGAGTTAGC      |
| 35 | ZFLOC562370 E9 fwd         | AGTACCTGCGAGTGGGCAAAGC       |
|    | ZFLOC562370 E10 rev        | CCAAGAATAGAGGCTCCTGCTACCG    |
| 36 | ZFscrib E27 fwd            | GAAATGGTAAGAGAGACGTCCAGTG    |
|    | ZFscribE28 rev             | GGCAGAGCCGCCAGTGTCTTATAG     |
| 37 | ZFdync1li1 E11 fwd         | TCCCACAGGCTCACCAAGGAC        |
|    | ZFdync1li1 E12 rev         | CCTGGTGTGTTGCTCCCTCCTC       |
| 38 | ZFilf3 E15 fwd             | CCTGGCGGCTCTGGAGAAACTG       |
|    | ZFilf3 E16 rev             | TCCTCCACCGTTGTTGAATCCCC      |
| 39 | ZFotpa E1 fwd              | CATGCCGACCTGCTGGATGCTC       |
|    | ZFotpa E2 rev              | CCTTCCACCGCATCGGAGACC        |
| 40 | ZFtcf12 E6 fwd             | TTCTCCTGACCACACCAGCAGTAG     |
|    | ZFtcf12 E7 rev             | TGGAGGGAGTTCTCGTAGCTTGG      |
| 41 | ZFzgc162329 E1 fwd         | TGGCACCATAACTTCGGCTTGAGG     |
|    | ZFzgc162329 E2 rev         | GTCGGGTCCCTGGCTGGAAATATG     |
| 42 | ZFclasp2 E29 fwd           | CGCAGCCAGGAGGACATGACAG       |
|    | ZFclasp2 E30 rev           | GAGGAGGAGCCGAAGGAGGAG        |
| 43 | ZFc20orf149l E1 fwd        | CGGACGTGGAAGGTCTTATCCATC     |
|    | ZFc20orf149l E2 rev        | GTCGTGAGTGGCAACAAGAGAACC     |
| 44 | ZFsich211-214j24.10 E1 fwd | TGCGCGACACTCTCACGTACAC       |
|    | ZFsich211-214j24.10 E2 rev | GACGGTTGCGGATCTGTGGTTC       |
| 45 | ZFpabpc1a E15 fwd          | TCAGTGCCAGTCTCTGCTGTGC       |
|    | ZFpabpc1a E16 rev          | GCCTCTCAACCTGGCAGAGATTTG     |
| 46 | ZFaup1E8 fwd               | CTCAACGCAGATCACCAAAGCAGAC    |
|    | ZFaup1E9 rev               | GGACGTCTGGCAGCACTTCTTTC      |
| 47 | ZFdnajc7 E13 fwd           | TGATGCCAACAACATCTTCAAAGCATTC |
|    | ZFdnajc7 E14 rev           | TGGCACAGATGCAGGTCCAACCTG     |
| 48 | ZFzgc123105 E8 fwd         | GTCAGGGCTCCACCGCTTCTC        |
|    | ZFzgc123105 E9 rev         | GGGTGGCCTGGGCCTTCATTAC       |
| 49 | ZFhgs E9 fwd               | CCAGCACTGGGCCATCGGAAC        |

|    |                    |                               |
|----|--------------------|-------------------------------|
|    | ZFhgs E10 rev      | TTCTCCTCGGCCTCACTCTGGG        |
| 50 | ZFbcl7 E4 fwd      | TGGCCGCTTCTCAGAATGACAGC       |
|    | ZFbcl7 E5 rev      | CTGGGCCGATTTGGAAGAGTCTA       |
| 51 | ZFbrd2a E8 fwd     | GGCGGTGACTCCTCCTCTTCC         |
|    | ZFbrd2a E9 rev     | GATGATGGGCGTGGAGGACAGC        |
| 52 | ZFfoxp2 E18 fwd    | CGCAGTGCGACACAACCTCAGC        |
|    | ZFfoxp2 E19 rev    | CTGTAAGCTGGCGTTAAGAGCTGCC     |
| 53 | ZFpl10 E4 fwd      | GGGATAACGGACGCAGCAATGG        |
|    | ZFpl10 E5 rev      | GACCCGCGGTCATTGAAGAACG        |
| 54 | ZFzgc110753 E1 fwd | GTCTGAAACAAACATGGAGGAGACAG    |
|    | ZFzgc110753 E2 rev | CGAGGAAAGAGCCAAGTGTCTGG       |
| 55 | ZFzgc136497 E4 fwd | TCTGCAGATGGGTCAGTGTGGGC       |
|    | ZFzgc136497 E5 rev | GCTCGCTCTCCTCCCTCTTCC         |
| 56 | ZFbtf3 E1 fwd      | TCTCGCTTCCATCTTGCTCTCCG       |
|    | ZFbtf3 E2 rev      | CAATGCGGACTTGTGCCTGCAAC       |
| 57 | ZFslc1a2 E8 fwd    | CTCGTACGGCGCAGGTATCGTC        |
|    | ZFslc1a2 E9 rev    | ATCTCCGCAGTCGAGCCGTTGG        |
| 58 | ZFzgc152873 E7 fwd | CTGAAGACTCGGAGGCCACCAC        |
|    | ZFzgc152873 E8 rev | GGGTTGAAGCGAATGTGCAAGGAG      |
| 50 | ZFldb1a E1 fwd     | CTGCTTTCCGCACAGCACGATGG       |
|    | ZFldb1a E2 rev     | CACTACCGTTGGGAGGCTCCTTTG      |
| 60 | ZFher8a E3 fwd     | CTGGAGATCACAGTTCAGCACATGG     |
|    | ZFher8a E4 rev     | GGGTTCGGTGCTGATGTGAGG         |
| 61 | ZFzgc77282 E1 fwd  | CGAGACTCCAGAGAAGACTTCGAC      |
|    | ZFzgc77282 E2 rev  | CCATCTCTGAAGCGTCCCATGC        |
| 62 | ZFeno1 E3 fwd      | AGAGCTGCAGTGCCCAGTGGTG        |
|    | ZFeno1 E4a rev     | GCAGGGGCCAAGAACTCATTAC        |
| 63 | ZFeno1 E3 fwd      | AGAGCTGCAGTGCCCAGTGGTG        |
|    | ZFeno1 E4b rev     | CCAGACCAGGTGCAATTGTTTTATTGATA |
| 64 | ZFpkm2a E8 fwd     | GCAGTGATGTGGCCAATGCAGTTC      |
|    | ZF pkm2a E8a rev   | GTCCTCAAACACCTGCCGATGAAAC     |
| 65 | ZFpkm2a E8 fwd     | GCAGTGATGTGGCCAATGCAGTTC      |
|    | ZF pkm2a E9 rev    | GTCACGGGTGAGAACAGAGGAG        |
| 66 | ZFrpl38 E4 fwd     | AGGCTGAGAAGCTCAAGCAGTCC       |
|    | ZFrpl38 iD rev     | CTGAAAAACCAAAATGCTGGACACAAATG |
| 67 | ZFrpl38 E4 fwd     | AGGCTGAGAAGCTCAAGCAGTCC       |
|    | ZFrpl38 E5 rev     | CCAACATTTGTACAAGAGACATCTACTTC |
| 68 | ZFrps27a E1 fwd    | TCGGTTTCCGCCATCTAAGAGCTG      |
|    | ZFrps27a E2 rev    | CGAGGGTGATGGTTTTACCCGTGAG     |
| 69 | ZFrps27a E1 fwd    | TCGGTTTCCGCCATCTAAGAGCTG      |
|    | ZFrps27a E3 rev    | TCCTTGTCTTGAATCTTTGCCTTGAC    |
| 70 | ZFpl10 E1 fwd      | AGGAACCCGTCTATCCGCGACAC       |
|    | ZFpl10 E2 rev      | CATCAGCGGAGCTCAAGTCTAGGG      |
| 71 | ZFeif4a1b E1 fwd   | GTGATAATGTCGGCAGATTATGAAGGG   |
|    | ZFeif4a1b E2 rev   | CAATGACTCCATCTGGCTCCATGC      |
| 72 | ZFeif4a1b E1 fwd   | GTGATAATGTCGGCAGATTATGAAGGG   |
|    | ZFeif4a1b E3 rev   | TTTGCTGGATGGCAGAGGGCTTC       |
| 73 | ZFrfox4 E4 fwd     | TACGAGATCGCAGAGGGTGTGTG       |
|    | ZFrfox4 iE rev     | GGGAGCGGGATAAGGGTGTGCG        |

|                              |                    |                               |
|------------------------------|--------------------|-------------------------------|
| 74                           | ZFzgc101644 E1 fwd | CTCACACACGGCTGTGGTATTGC       |
|                              | ZFzgc101644 E2 rev | CCGCTCTTATCCGCCACTCTAC        |
| 75                           | ZFjph1b E5 fwd     | CCTCACTTGACGGAACATTAACCTCAG   |
|                              | ZFjph1b iE rev     | TGAGCTCACTGAAGGGTCGAAACAG     |
| 76                           | ZFzgc56141 E3 fwd  | GCACCCGCAGGAAATGGTACTC        |
|                              | ZFzgc56141 E4 rev  | GGAGACGACGACGACGATCTTG        |
| 77                           | ZFcct2 E9 fwd      | CACAACCTGGTCCGTTGCTGATGG      |
|                              | ZFcct2 E10 rev     | TTCTCAGGGCCATGACTCTCCAC       |
| <b>control<br/>ZFrpl38</b>   | ZFrpl38 E4 fwd     | AGGCTGAGAAGCTCAAGCAGTCC       |
|                              | ZFrpl38 E5 rev     | CCAACATTTGTACAAGAGACATCTACTTC |
| <b>control<br/>ZFrps27a</b>  | ZFrps27a E5 fwd    | TCCACACTTCATCTGGTGCTGAG       |
|                              | ZFrps27a E6 rev    | AGACGGTGGATCTTGCCATTCTC       |
| <b>control<br/>ZFeif4a1b</b> | ZFeif4a1b E7 fwd   | CCCTTGAGGGTATCCGTCAGTTC       |
|                              | ZFeif4a1b E8 rev   | GAAGTCCCTGGCATGCATCTTTTCTG    |
